# Supplementary material for: Efficacy of diagnostic testing for allergen sensitization in canine atopic dermatitis: a systematic review
Source: Front Vet Sci. 2025 May 21;12:1551207. doi: 10.3389/fvets.2025.1551207 (PMC12133834; doi:10.3389/fvets.2025.1551207)
Supplement: Supplementary file 1 [file Table_1.xlsx]

## Sheet: citations
CONS.	DATABASE	TITLE	REFERENCE	TYPE	YEAR	LANGUAGE	URL	ABSTRACT	Conserved by title (Y/N) RM	1. Irrelevant topics	2. Species other-than canines	3. Not an original article	4. Other languages	Duplicated	Conserved by title (Y/N) NC	1. Irrelevant topics	2. Species other-than canines	3. Not an original article	4. Other languages	Duplicated	Compendium by title	Conserved by abstract (Y/N) RM	1. Irrelevant topics	2. Species other-than canines	3. Not an original article	4. Other languages	Duplicated	Conserved by abstract (Y/N) MSG	1. Irrelevant topics	2. Species other-than canines	3. Not an original article	4. Other languages	Duplicated	Compendium by abstract	Conserved by fulltext (Y/N) RM	1. Irrelevant topics	2. Species other-than canines	3. Not an original article	4. Other languages	Duplicated	Conserved by fulltext (Y/N) NC	1. Irrelevant topics	2. Species other-than canines	3. Not an original article	4. Other languages	Duplicated	Not available as an OA	Compendium by full text
1	Ovid MEDLINE(R)	[ALLERGY TO ANIMAL HAIR IN CHILDREN. I. CRITICAL REVIEW]. [Review] [0 refs] [French]	Lille Medical. 41:675-84, 1963 Oct.	Journal Article Review	1963	French	Click here for full text options		N	X	X	X			N	X	X	X			N
2	Ovid MEDLINE(R)	[THE DIAGNOSTIC AND PROGNOSTIC ROLE OF THE PROTEIN PICTURE IN ALLERGIC DISEASES AND TUBERCULOSIS]. [French]	Acta Allergologica. 19:427-43, 1964.	Journal Article	1964	French	Click here for full text options		N	X					N	X					N
3	Ovid MEDLINE(R)	[Studies on the intradermal reactions with the fractions of Ascaris lumbricoides]. [Korean]	Kisaengch'Ung Hak Chapchi. 5(1):17-34, 1967 Jun.	Journal Article	1967	Korean	Click here for full text options	INTRODUCTION : The studies on allergic reaction with the substances of Ascaris lumbricoides have long been studied by various worers; Conventry(1929), Campbell(1936), Sakei(1949), Miyakawa(1950), Ikeda(1952), Matsumoto and Imawari(1952), Morishita and Kobayashi(1953, 1954), Komiyayama(1954) and Yammoto(1956). Campbell(1936) and some other workers reported that the polysaccharides from ascaris pro…	N				X		N				X		N
4	Ovid MEDLINE(R)	Flea-bite dermatitis: a simple method of diagnosing suspected flea infestation in hypersensitive dogs.	Veterinary Medicine, Small Animal Clinician. 64(7):580-3, 1969 Jul.	Journal Article	1969	English	Click here for full text options		N	X					N	X					N
5	Ovid MEDLINE(R)	Basic mechanism of hypersensitivity reactions. [Review] [249 refs]	Indian Journal of Physiology & Pharmacology. 13(4):191-221, 1969 Oct.	Journal Article Review	1969	English	Click here for full text options		N			X			N			X			N
6	Ovid MEDLINE(R)	Ultrastructural aspects of delayed hypersensitivity. [Review] [236 refs]	Current Topics in Pathology. 52:143-208, 1970.	Journal Article Review	1970	English	Click here for full text options		N			X			N			X			N
7	Ovid MEDLINE(R)	Hookworm dermatitis.	Journal of the American Veterinary Medical Association. 158(6):735-9, 1971 Mar 15.	Journal Article	1971	English	Click here for full text options		N	X					N	X					N
8	Ovid MEDLINE(R)	A follow-up study of children with asthmatoid bronchitis. I. Skin test reactions and IgE antibodies to common allergens.	Acta Paediatrica Scandinavica. 62(6):633-44, 1973 Nov.	Journal Article	1973	English	Click here for full text options		N	X	X				N	X	X				N
9	Ovid MEDLINE(R)	Successful treatment of inhalant allergic dermatitis with aqueous hyposensitization.	Veterinary Medicine, Small Animal Clinician. 68(5):465-6, 1973 May.	Journal Article	1973	English	Click here for full text options		N	X					N	X					N
10	Ovid MEDLINE(R)	Evaluation of the patient with allergic disease.	Veterinary Clinics of North America. 4(1):17-27, 1974 Feb.	Journal Article	1974	English	10.1016/s0091-0279(74)50002-4	In allergic diseases there are many factors that have to be taken into consideration. (1) Practically "any organ or tissue of the body may become the target" of immunologically mediated disease. In the dog our attention is drawn to the skin most, because this is the organ that is most frequently offended and seems to be the chief target, comparable to the lungs in man. However, this should not de…	Y						Y						Y	Y						Y						Y	N			X			N	X		X				N
11	Ovid MEDLINE(R)	[Allergy to animal hair. Cutaneous manifestations (author's transl)]. [Spanish]	Anales Espanoles de Pediatria. 8(6):609-13, 1975 Nov-Dec.	English Abstract Journal Article	1975	Spanish	Click here for full text options	The authors report 25 cases of allergy to animal hair in childhood. 13 patients were polisensitized, and in the remaining 12 hair was the only allergen responsible for the clinical picture. The main clinical features are discussed and the high incidence of atopic cutaneous signs pointed out. In three patients these were the only clinical manifestation. Desensitization was successful, although thi…	Y						Y						Y	N	X	X				N						N
12	Ovid MEDLINE(R)	Immunological features of asthma (Part II). A report to the Research Committee of the British Thoracic and Tuberculosis Association.	Clinical Allergy. 5(4):403-16, 1975 Dec.	Journal Article Research Support, Non-U.S. Gov't	1975	English	Click here for full text options	A serological comparison was made of two groups of 120 matched asthmatic and healthy subjects, between the ages of 20 and 49 years and matched for age and sex, in terms of serum total levels of IgG, IgM, IgA, IgD and IgE and of specific antibody levels in each immunoglobulin class to five common UK allergens. The relationship of clinical features to the serological tests was also examined in the …	N	X					N	X					N							N
13	Ovid MEDLINE(R)	A screening test for canine atopic dermatitis.	Veterinary Medicine, Small Animal Clinician. 70(11):1315-9, 1975 Nov.	Journal Article	1975	English	Click here for full text options	No encontrado	Y						Y						Y	N	X					N	X					N
14	Ovid MEDLINE(R)	Pharmacodynamic study of the capillaries of normal and allergic (atopic) subjects.	International Archives of Allergy & Applied Immunology. 49(3):341-9, 1975.	Journal Article	1975	English	Click here for full text options	Using the capillary resistance test as a method to study the cutaneous microvessels, a number of capillary active agents were investigated by applying them percutaneously in hydrophylic ointment base to manifestly allergic and definitely non-allergic volunteers. While the catecholamines and heparin increased capillary resistance in both allergic and non-allergic groups, metacholine, serotonin, th…	N	X					N	X					N							Y
15	Ovid MEDLINE(R)	[Allergy to domestic animals]. [Spanish]	Medicina Cutanea Ibero-Latino-Americana. 4(4):281-4, 1976.	English Abstract Journal Article	1976	Spanish	Click here for full text options	This report concerns of 37 cases of allergenicity to domestic animals, dogs and cats. Clinical observations and skin tests confirm diagnosis showing dog and cat danders as etiologic factors. Sixteen cases were positive only to cat and dog danders and twenty one cases were associated with house dust, mould spores, feathers, etc. Bronchial asthma, rhinitis and contact dermatitis in face and lips we…	Y						Y						Y	N	X	X				Y						N
16	Ovid MEDLINE(R)	Cell mediated immunity in the chinchilla (Chinchilla laniger): in vitro lymphocyte transformation.	Laboratory Animal Science. 26(5):751-7, 1976 Oct.	Journal Article Research Support, U.S. Gov't, P.H.S.	1976	English	Click here for full text options	The cell mediated immune system of the chinchilla (Chinchilla laniger) was examined using both in vivo and in vitro methods. An in vitro lymphocyte transformation microassay was developed utilizing tritiated thymidine incorporation into spleen cells stimulated by the nonspecific mitogen, phytohemagglutinin-M. Peak stimulation of blastogenesis occurred between 48 and 72 hours of incubation with 5 …	N	X	X				N	X	X				N							Y
17	Ovid MEDLINE(R)	A comparative study of skin tests and determination of the serum level of specific IgE immunoglobulins by means of the radioallergosorbent test in subjects with atopy.	Dermatologica. 152(2):100-8, 1976.	Comparative Study Journal Article	1976	English	10.1159/000251168	On 73 patients suspected for atopic diseases, 258 skin tests and radioallergosorbent tests (RAST) for specific IgE in serum were carried out. The results of both tests were compared in connection with the clinical picture. A good qualitative positive correlation was found, especially for grass pollen and house dust. False positive results with RAST cannot be excluded. The RAST seems to be a valua…	Y						Y						Y	Y						Y						Y	N		X				N	X	X					N
18	Ovid MEDLINE(R)	A comparative study of allergens of canine origin.	Annals of Allergy. 39(4):240-5, 1977 Oct.	Comparative Study Journal Article	1977	English	Click here for full text options	Among 115 children and young adults studied, 52 had current and 25 had past household exposure to dogs, totaling 77 subjects. Of 53 with clinical hypersensitivity to dog, 32 had a history of exposure, 34 positive cutaneous reactions and 15 RAST positive results. Of 62 without clinical hypersensitivity, 45 had a history of household exposure, 24 positive cutaneous reactions and 6 RAST positive res…	Y						Y						Y	N	X	X				N		X				N
19	Ovid MEDLINE(R)	A disease in dogs resembling human subcorneal pustular dermatosis.	Journal of the American Veterinary Medical Association. 170(7):704-8, 1977 Apr 01.	Journal Article	1977	English	Click here for full text options	A pustular eruption similar to subcorneal pustular dermatosis of man occurred in 10 dogs. The disease was characterized by pustules of the trunk, which ruptured to form annular or gyrate lesions with irregular, scaling borders. Biopsies revealed subcorneal pustules with occasional acantholytic cells. All 10 dogs improved after daily administration of diaminodiphenylsulfone (dapsone).	N	X					N	X					N							Y
20	Ovid MEDLINE(R)	Common canine dermatoses.	Journal of the South African Veterinary Association. 48(4):247-53, 1977 Dec.	Journal Article	1977	English	Click here for full text options	Refractory canine skin disorders from a large percentage of the cases referred to the Department of Medicine, Faculty of Veterinary Science, University of Pretoria. Included in these conditions are allergic skin diseases, primary pyoderma, generalised pustular demodicosis, endocrine alopecia, dermatomycosis, seborrhoea, acral pruritic nodule and nasal solar dermatitis. These conditions are discus…	Y						Y						Y	Y						Y						Y	N						N	X					X	N
21	Ovid MEDLINE(R)	Fleabite allergic dermatitis: a review and survey of 330 cases.	Journal of the American Veterinary Medical Association. 173(3):282-8, 1978 Aug 01.	Journal Article	1978	English	Click here for full text options	Clinical signs of acute fleabite allergic dermatitis (FAD) in dogs included intense pruritus and erythema. Dogs with chronic FAD had diminished pruritus. The primary lesion of FAD was a papule. Secondary lesions (hyperkeratosis and hyerpigmentation) were common. Diagnosis of FAD was based on history of flea infestation and on type and location of lesions. Intradermal testing with glycerinated fle…	N	X					N	X					N							Y
22	Ovid MEDLINE(R)	Canine allergic inhalant dermatitis: a review of 230 cases.	Journal of the American Veterinary Medical Association. 172(1):55-60, 1978 Jan 01.	Journal Article	1978	English	Click here for full text options		N	X					N	X		X			N							Y
23	Ovid MEDLINE(R)	[Allergy caused by animal ectodermal derivatives in children]. [Italian]	Minerva Pediatrica. 31(4):251-8, 1979 Feb 28.	English Abstract Journal Article	1979	Italian	Click here for full text options		N	X					N		X		X		N							Y
24	Ovid MEDLINE(R)	Atopy.	Veterinary Clinics of North America - Small Animal Practice. 9(1):117-32, 1979 Feb.	Journal Article	1979	English	Schweizerische Medizinische Wochenschrift. Journal Suisse de Medecine. 109(33):1205-12, 1979 Sep 01	Atopy should be considered an immunological disorder that may result in several clinical conditions including respiratory disease, allergic dermatitis, food allergy dermatitis, and perhaps flea allergy dermatitis. The clinical course of the disease tends to fluctuate from season to season, which makes objective evaluation of injection therapy difficult. The disease is subject to both familial and…	Y						Y						Y	Y						Y						Y	N						N	X					X	N
25	Ovid MEDLINE(R)	Canine allergic contact dermatitis: a clinical review.	Journal of Small Animal Practice. 21(1):17-27, 1980 Jan.	Journal Article	1980	English	Click here for full text options		N	X		X			N	X		X			N							Y
26	Ovid MEDLINE(R)	Bronchial hyperreactivity.	European Journal of Respiratory Diseases - Supplement. 108:21-8, 1980.	Journal Article	1980	English	Click here for full text options		N	X					N	X					N							Y
27	Ovid MEDLINE(R)	Dependence of immediate hypersensitivity in the adolescent period on factors encountered in infancy.	Allergy. 36(4):263-8, 1981 May.	Journal Article Research Support, Non-U.S. Gov't	1981	English	Click here for full text options	708 unselected adolescents 15-17 years old were studied. They were physically examined, interviewed and skin prick tested with 12 common allergens. Questionnaires were distributed to the adolescents and their parents to investigate past and present symptoms and environmental influences. Emphasis was on the first year of life. Exposition to allergens (pollens and cat epithelium) during the first 6…	N	X					N	X	X				N							Y
28	Ovid MEDLINE(R)	Investigative techniques in small animal clinical dermatology. [Review] [17 refs]	British Veterinary Journal. 137(2):133-54, 1981 Mar-Apr.	Journal Article Review	1981	English	Click here for full text options		N			X			N			X			N							Y
29	Ovid MEDLINE(R)	Relationship of allergen-specific IgE antibodies, skin prick tests and allergic disorders in unselected adolescents.	Allergy. 36(4):251-6, 1981 May.	Journal Article Research Support, Non-U.S. Gov't	1981	English	Click here for full text options	The relationship between serum levels of allergen-specific IgE (RAST) and skin prick test reactivity and allergic disorders was evaluated in 137 subjects randomly selected from an adolescent population. All subjects were prick tested with six common allergens, interviewed and physically examined. In addition, serum was collected for RAST analysis with three to six allergens. At least one positive…	N		X	X			N		X				N							N	X
30	Ovid MEDLINE(R)	Evaluation of the intradermal allergy test in normal dogs.	Research in Veterinary Science. 32(1):57-61, 1982 Jan.	Comparative Study Journal Article	1982	English	https://doi.org/10.1016/S0034-5288(18)32438-X	In 45 normal dogs, serial dilutions of different allergens were injected intradermally to determine the skin threshold concentrations. For housedust, housedust mite (Dermatophagoides pteronyssinus) and human dandruff extracts these were found to be the same in the dog as in man, while those for animal dandruffs, pollens and fungi were 10 times higher in the dog. The term 'histamine reactive value…	Y						Y						Y	Y						Y						Y	Y						Y							Y
31	Ovid MEDLINE(R)	Immunoglobulin E antibodies to ingested cereal flour components: studies with sera from subjects with asthma and eczema.	Clinical Allergy. 12(1):63-74, 1982 Jan.	Journal Article	1982	English	Click here for full text options	The specificity of immunoglobulin E for different cereal grain proteins was investigated using sera from twenty paediatric patients with asthma and/or eczema. Close correlations were observed between radioallergosorbent test values for grain extracts of wheat, rye and barley, and, to a lesser extent, oats. Of the different wheat four fractions tested, the globulins and glutenins consistently boun…	N		X				N	X					N							N
32	Ovid MEDLINE(R)	Type I and type IV hypersensitivity in animals. [Review] [42 refs]	Journal of the American Veterinary Medical Association. 181(10):1083-7, 1982 Nov 15.	Journal Article Research Support, Non-U.S. Gov't Review	1982	English	Click here for full text options		N			X			N			X			N							N	X
33	Ovid MEDLINE(R)	Clinical associations with serum allergen-specific IgG4 antibodies.	Clinical Allergy. 12(5):459-64, 1982 Sep.	Journal Article Research Support, Non-U.S. Gov't	1982	English	Click here for full text options	Serum total and allergen-specific IgE and IgG4 antibodies, were measured in eighty-seven atopic and nineteen non-atopic asthmatics. The allergens studied were: Dermatophagoides pteronyssinus, grass pollens, cat dander, dog dander, milk and egg. Sixty-eight atopic asthmatics and fourteen non-atopic asthmatics were found to have allergen-specific IgG4 antibodies, to at least one of the allergens te…	Y						Y						Y	N	X	X				Y						N
34	Ovid MEDLINE(R)	Investigations of the symptomatology and the significance of immediate skin test reactivity in canine atopic dermatitis.	Research in Veterinary Science. 34(3):261-5, 1983 May.	Comparative Study Journal Article	1983	English	Click here for full text options	Immediate skin test reactivity was determined with skin threshold concentrations of different allergen solutions in 208 dogs suspected of atopic dermatitis. Thirty-eight of the dogs (18.3 per cent) exhibited no reaction. Multisensitivity occurred in 59.1 per cent. House dust (39.4 per cent), human dandruff (39.9 per cent), dog dandruff (25.0 per cent), cat dandruff (29.8 per cent) and grasses (21…	Y						Y						Y	Y						Y						Y	Y						Y							Y
35	Ovid MEDLINE(R)	The atopic dog model: report of an attempt to establish a colony.	International Archives of Allergy & Applied Immunology. 72(2):97-101, 1983.	Journal Article Research Support, U.S. Gov't, P.H.S.	1983	English	10.1159/000234849	In an attempt to establish a colony of atopic dogs as a research resource, dogs with seasonal dermatitis - a reported manifestation of naturally occurring allergy in that species - were identified, acquired, and inbred. Progeny were studied during their first 2 years of life to determine if the trait could be genetically transmitted and to investigate the hypothesis that this spontaneously occurr…	Y						Y						Y	Y						Y						Y	N	X					N	X						N
36	Ovid MEDLINE(R)	An overview of immune-mediated mucocutaneous diseases of the dog and cat. I. Diseases based on allergic reactions.	American Journal of Dermatopathology. 5(5):505-9, 1983 Oct.	Journal Article	1983	English	10.1097/00000372-198310000-00017	Hypersensitivity has become increasingly recognized as an essential feature in a wide variety of cutaneous and mucous membrane diseases of the dog and cat. Up to recent times, the concept of hypersensitivity as a pathologic mechanism in cuta- neous diseases of the dog was involved in the so- called "grass allergies." During the second quarter of this century, and particularly in the past decade, …	Y						Y						Y	Y						Y						Y	N	X					N	X						N
37	Ovid MEDLINE(R)	Allergic reactions to industrial chemicals. [Review] [80 refs]	Clinical Immunology Reviews. 2(1):1-58, 1983.	Case Reports Journal Article Review	1983	English	Click here for full text options		N			X			N	X		X			N							Y
38	Ovid MEDLINE(R)	Canine atopic disease: investigations of eosinophils and the nasal mucosa.	American Journal of Veterinary Research. 45(9):1867-9, 1984 Sep.	Journal Article	1984	English	Click here for full text options	Blood eosinophil counts were comparable in dogs with and without canine atopic disease. Eosinophils were not observed in the nasal smears of any of the dogs studied. Of 46 dogs with atopic disease, a significant increase (P less than 0.001) in nasal airway resistance was observed in 2 dogs after nasal provocation with nebulized allergens of grasses and in 1 dog after provocation with summer weed …	Y						Y						Y	N	X					Y						N
39	Ovid MEDLINE(R)	Effect of hyposensitization on atopic dermatitis in dogs.	Journal of the American Veterinary Medical Association. 184(10):1277-80, 1984 May 15.	Clinical Trial Journal Article	1984	English	Click here for full text options	In a double-blind study, 51 dogs with clinically defined atopic dermatitis were injected with either alum-precipitated allergen solutions or a placebo. Comparing the treatment results of both groups on the basis of scores for clinical signs, a significant difference in clinical improvement was established in favor of the allergen-treated dogs (P less than 0.01). The proportional changes of scores…	Y						Y						Y	N	X					Y						N
40	Ovid MEDLINE(R)	Atopic dermatitis. [Review] [141 refs]	Journal of Allergy & Clinical Immunology. 73(2):211-26, 1984 Feb.	Journal Article Research Support, Non-U.S. Gov't Review	1984	English	Click here for full text options		N			X			N			X			N							N	X
41	Ovid MEDLINE(R)	Antigenic/allergenic composition of Poodle/Alsatian dandruff extract	Allergy. 39(2):125-33, 1984 Feb.	Journal Article	1984	English	10.1111/j.1398-9995.1984.tb01944.x	Poodle and Alsatian dog dandruff extracts were characterized by crossed immunoelectrophoresis (CIE) and crossed radioimmunoelectrophoresis (CRIE) using sera from 24 individuals clinically sensitive to dogs. By using a system with intermediate gel in immunoelectrophoresis, the content of dander-specific and serum-specific allergens was established. 29 antigens (18 dander-specific and 11 serum-spec…	Y						N	X					Y	Y						Y						Y	N		X				N	X	X					N
42	Ovid MEDLINE(R)	Atopic dermatitis in Norwegian dogs.	Nordisk Veterinaermedicin. 37(2):97-106, 1985 Mar-Apr.	Journal Article Research Support, Non-U.S. Gov't	1985	English	Click here for full text options	Of 122 dogs showing clinical symptoms of atopic dermatitis, 65.6% exhibited immediate skin test reactivity to one or more well defined allergen extracts, when intradermal skin tests were performed. The Prausnitz-Kustner test performed on two non-atopic recipient dogs, with serum from affected dogs, showed that "reaginic" antibodies transferred in serum from all affected dogs remained bound within…	Y						Y						Y	Y						Y						Y	N						N	X					X	N
43	Ovid MEDLINE(R)	Allergen specific IgGd antibodies in dogs with atopic dermatitis as determined by the enzyme linked immunosorbent assay (ELISA).	Clinical & Experimental Immunology. 59(2):359-63, 1985 Feb.	Journal Article	1985	English	Anticuerpos IgGd específicos contra alérgenos en perros con dermatitis atópica determinados por el ensayo de inmunoabsorción ligado a enzimas (ELISA). -PMC (lookproxy.com)	Allergen specific IgGd antibodies were detected by the enzyme linked immunosorbent assay (ELISA) in 89% of the 62 atopic dogs studied. Antibodies were found most frequently against house dust (47%), human dander (50%), grass pollens (58%) and spring tree pollens (43%). These antibodies were also found in 11 of 20 dogs with atopic symptoms but without immediate skin test reactivity to inhalant all…	Y						Y						Y	Y						Y						Y	Y						Y							Y
44	Ovid MEDLINE(R)	Responses of atopic dogs to regional allergens: 268 cases (1981-1984).	Journal of the American Veterinary Medical Association. 189(11):1493-6, 1986 Dec 01.	Comparative Study Journal Article	1986	English	Click here for full text options	Responses of atopic dogs to intradermal challenge with 60 allergens were determined and compared for 4 regions of the United States Twenty-seven allergens incited significantly higher responses in atopic dogs residing in northern Florida, when compared with dogs in Illinois; responses to 28 allergens were more significant in dogs residing in southern Florida vs Illinois. Only 1 allergen caused mo…	Y						Y						Y	Y						Y						Y	N						N	X					X	N
45	Ovid MEDLINE(R)	Food hypersensitivity in 30 dogs.	Journal of the American Veterinary Medical Association. 188(7):695-8, 1986 Apr 01.	Journal Article	1986	English	Click here for full text options	Food hypersensitivity was diagnosed in 30 dogs. Clinical signs varied, with pruritus (97%), erythema (50%), and papules (37%) being the most common. Diagnosis was based on resolution of clinical signs when the dogs were fed a restricted ("hypoallergenic") diet, and recurrence of signs when fed their original diet or other foods. No age, breed, or sex predilection was noticed. None of the owners c…	N	X					N	X					N							Y
46	Ovid MEDLINE(R)	Mechanisms of antigen-induced reactions in skin and lung.	Respiration. 50 Suppl 2:42-56, 1986.	Journal Article Research Support, Non-U.S. Gov't Research Support, U.S. Gov't, P.H.S.	1986	English	Click here for full text options	Investigators have tried to develop various experimental preparations suitable to study the effects of antigen on skin and airways in order to understand the mechanisms involved in asthma and to develop new methods of diagnosis, prevention and treatment. We have gained considerable experience in studies of specific antigens in inbred dogs with increased levels of serum IgE antibodies to aeroaller…	Y						N	X					Y	N	X	X				N	X					N
47	Ovid MEDLINE(R)	Compositae dermatitis in childhood.	Archives of Dermatology. 123(4):500-2, 1987 Apr.	Case Reports Journal Article	1987	English	Click here for full text options	Compositae dermatitis occurred in a 9-year-old boy with a strong personal and family history of atopy. Positive patch test reactions were 2+ for dandelion (Taraxacum officinale), false ragweed (Ambrosia acanthicarpa), giant ragweed (Ambrosia trifida), short ragweed (Ambrosia artemisifolia), sagebrush (Artemisia tridentata), wild feverfew (Parthenium hysterophorus), yarrow (Achillea millifolium), …	N		X				N	X	X				N							Y
48	Ovid MEDLINE(R)	The prevalence of allergic skin test reactivity to eight common aeroallergens in the U.S. population: results from the second National Health and Nutrition Examination Survey.	Journal of Allergy & Clinical Immunology. 80(5):669-79, 1987 Nov.	Comparative Study Journal Article	1987	English	Click here for full text options	Immediate hypersensitivity skin tests to eight select allergens were performed on a sample (N = 16,204) of the civilian noninstitutional population of the United States, 6 to 74 years of age, in the second National Health and Nutrition Examination Survey (NHANES II). The eight allergens were house dust, cat, dog, Alternaria, mixed giant/short ragweed, oak, perennial ryegrass, and Bermuda grass. S…	N		X				N		X				N							Y
49	Ovid MEDLINE(R)	Antigenic analysis of household dust samples.	American Review of Respiratory Disease. 137(2):358-63, 1988 Feb.	Journal Article Research Support, Non-U.S. Gov't Research Support, U.S. Gov't, P.H.S.	1988	English	Click here for full text options	Household dust samples from the homes of 106 allergy clinic patients in Baltimore were analyzed for specific allergen content. Dust mite antigen content was determined by enzyme-linked immunosorbent assays (ELISA) specific for the major allergens of Dermatophagoides pteronyssinus, D. farinae, and D. microceras. Cat and dog antigen content were determined by ELISA using antisera for Fel d 1 (forme…	N	X					N	X					N							Y
50	Ovid MEDLINE(R)	[Atopic dermatitis in dogs: current diagnostic criteria]. [Review] [32 refs] [Dutch]	Tijdschrift voor Diergeneeskunde. 113(2):74-9, 1988 Jan 15.	Comparative Study English Abstract Journal Article Review	1988	Dutch	Click here for full text options	The diagnostic features of atopic dermatitis in man and dogs are compared in the present paper. On this basis, reconsidering the diagnostic criteria to be applied in the canine diseases, is suggested. [References: 32]	Y						N			X	X		Y	Y						Y						Y	N				X		N	X			X			N
51	Ovid MEDLINE(R)	[Atopic dermatitis in dogs: symptomatology and diagnosis]. [Review] [21 refs] [Dutch]	Tijdschrift voor Diergeneeskunde. 113(2):66-73, 1988 Jan 15.	English Abstract Journal Article Review	1988	Dutch	Click here for full text options	The immunological backgrounds of canine atopy, and in particular of atopic dermatitis, are described in the present review. The significance of the history, the intradermal allergic test and the determination of allergen-specific antibodies in the diagnosis of canine atopy is discussed. [References: 21]	Y						N			X	X		Y	Y						N			X			N
52	Ovid MEDLINE(R)	Diseases of the pinna.	Veterinary Clinics of North America - Small Animal Practice. 18(4):869-84, 1988 Jul.	Journal Article	1988	English	Click here for full text options	Many diseases can affect the pinna of the dog and cat. These diseases represent most categories of cutaneous disease, from infectious to neoplastic. Although some diseases affect primarily the pinna, most pinnal dermatoses occur in conjunction with other integumentary disorders. One should approach the diagnostic work-up of pinnal disease in an organized manner, obtaining first a thorough history…	Y						N	X					Y	Y						N	X					N
53	Ovid MEDLINE(R)	Carpet deodorizer as a contact allergen in a dog.	Journal of the American Veterinary Medical Association. 193(12):1553-4, 1988 Dec 15.	Case Reports Journal Article	1988	English	Click here for full text options	Allergic contact dermatitis was diagnosed in a 7-year-old dog. Clinical signs and history were consistent with a contact allergen being the cause of pruritic skin disease. Patch testing confirmed that carpet deodorizer was the allergen.	N			X			N	X					N							Y
54	Ovid MEDLINE(R)	Atopic dermatitis. [Review] [43 refs]	Veterinary Clinics of North America - Small Animal Practice. 18(5):1049-59, 1988 Sep.	Journal Article Review	1988	English	Click here for full text options	The article considers the pathogenesis, clinical signs, diagnosis, and treatment of atopic dermatitis. [References: 43]	N			X			N			X			N							Y
55	Ovid MEDLINE(R)	Skin disorders and prick and patch test reactivity in Finnish reindeer herders.	Dermatosen in Beruf und Umwelt. Occupational & Environmental Dermatoses. 36(3):83-5, 1988 May-Jun.	Journal Article Research Support, Non-U.S. Gov't	1988	English	Click here for full text options	In addition to an interview, skin tests and clinical examinations were performed on 211 randomly selected reindeer herders from 21 to 77 years of age (mean 45 years). Skin tests consisted of skin prick tests (SPT) with 9 allergens: cat and cow epithelium, dog, horse and reindeer epithelium, house dust mite, birch pollen, meadow grass pollen and mugwort pollen, as well as patch tests with 31 aller…	N		X				N	X	X				N							N	X
56	Ovid MEDLINE(R)	T-cell subset assay. A useful differentiating marker of atopic and seborrheic eczema in infancy?.	Archives of Dermatology. 124(8):1235-8, 1988 Aug.	Journal Article	1988	English	Click here for full text options	To confirm T-cell changes previously reported in atopic eczema, to compare T-cell subset values in atopic and seborrheic infants, and to determine whether T-cell subset assay would be a useful differentiating marker between atopic and seborrheic infants, three age- and sex-matched groups of normal, seborrheic, and atopic infants were recruited. T-cell subset values, total serum IgE, and serum IgE…	N	X	X				N		X				N							Y
57	Ovid MEDLINE(R)	Morphometric analyses of the skin of dogs with atopic dermatitis and correlations with cutaneous and plasma histamine and total serum IgE.	Veterinary Pathology. 27(3):179-86, 1990 May.	Journal Article Research Support, Non-U.S. Gov't	1990	English	10.1177/030098589002700305	In order to improve the diagnostic value of histopathologic examination of skin biopsy samples from dogs with atopic dermatitis and, perhaps, to identify any differences from the normal state that may predispose to this skin condition, we compared the anatomic and cellular morphology of skin from three standard sites in 21 normal and 15 atopic dogs. The standard sites were lateral neck, dorsal ru…	Y						Y						Y	Y						Y						Y	Y						Y							Y
58	Ovid MEDLINE(R)	[The usefulness of determining specific immunoglobulins E in atopic dermatitis in light of personal investigations]. [Polish]	Przeglad Dermatologiczny. 77(6):399-404, 1990 Nov-Dec.	English Abstract Journal Article	1990	Polish	Abstracto	In 67 patients with allergic dermatitis the levels of total IgE and specific IgEs against 14 allergens were determined by the FAST-test method. The most frequently raised levels of specific IgE were found against the following allergens: dog epidermis, timothy grass, Candida albicans, beef. Test by FAST method confirmed increased levels of total and specific IgEs in most cases of atopic dermatiti…	N		X				N		X		X		N							Y
59	Ovid MEDLINE(R)	[Atopic dermatitis in dogs: new diagnostic criteria]. [Review] [32 refs] [German]	Tierarztliche Praxis. 18(5):525-8, 1990 Oct.	English Abstract Journal Article Review	1990	German	Click here for full text options	The diagnostic features of atopic dermatitis in man and dogs are compared in this paper. Based on the comparison, new diagnostic possibilities for atopic dogs are presented. [References: 32]	N			X			N			X	X		N							Y
60	Ovid MEDLINE(R)	Allergic contact dermatitis in the dog. Principles and diagnosis. [Review] [25 refs]	Veterinary Clinics of North America - Small Animal Practice. 20(6):1443-56, 1990 Nov.	Journal Article Review	1990	English	Click here for full text options	Allergic contact dermatitis is a rare hypersensitivity disorder in the dog. Clinical diagnosis is not easy. Primary lesions are transient. Secondary lesions caused by chronic inflammation and self-trauma are commonly present on typical areas, especially in sparsely haired regions and on the feet. A presumptive diagnosis can be made based on the history, clinical signs, and positive standardized c…	N	X		X			N	X		X			N							N	X
61	Ovid MEDLINE(R)	Advances in methodology for diagnosis of allergic skin disease. [Review] [31 refs]	Veterinary Clinics of North America - Small Animal Practice. 20(6):1419-27, 1990 Nov.	Journal Article Review	1990	English	Click here for full text options	Advantages of IDST for diagnosis of atopy and selection of antigens for hyposensitization include the following: 1. The test is widely accepted by clients. 2. The clinician can select individual test allergens based on the patient history and geographic location. 3. It has been the standard for diagnosing atopy in the dog for more than 40 years. Disadvantages of IDST include the following: 1. The…	N			X			N			X			N							Y
62	Ovid MEDLINE(R)	[Atopic dermatitis in dogs. Symptomatology and diagnosis]. [Review] [21 refs] [German]	Tierarztliche Praxis. 19(1):96-101, 1991 Feb.	English Abstract Journal Article Review	1991	German	Click here for full text options	The immunological backgrounds of canine atopy, and in particular of atopic dermatitis, are described in the present review. The significance of the history, the intradermal allergic test and the determination of allergen-specific antibodies in the diagnosis of canine atopy are discussed. [References: 21]	Y						N				X		Y	Y						N			X			N
63	Ovid MEDLINE(R)	Allergy and allergy-like symptoms in 1,050 medical students.	Allergy. 46(1):20-6, 1991 Jan.	Journal Article	1991	English	Click here for full text options	During a 10-year period 1,050 medical students were questioned regarding allergy and allergy-like symptoms and 612 of them underwent skin prick tests with dog, cat, timothy and birch allergens. Symptoms of eczema, asthma or non-infectious rhinitis, past or current, or current reactions to pollen, furred animals, dust, mould or food were reported by 46% of the students. Three per cent reported pre…	N		X				N	X	X				N							Y
64	Ovid MEDLINE(R)	[Comparison of the intradermal and prick tests for diagnosis of allergy in the dog]. [German]	Tierarztliche Praxis. 19(4):428-30, 1991 Aug.	Comparative Study English Abstract Journal Article	1991	German	Click here for full text options	The diagnosis of allergic dermatitis and respiratory disease is increasing in veterinary practice. Searching for the initiating allergen(s) can be done with several kinds of dermal tests. In four healthy dogs and in 18 patients with a dermal or respiratory allergy problem the intradermal and prick tests were compared. Intradermal test reactions were readily identifiable and correlated well with a…	Y						N	X			X		Y	Y						Y						Y	N				X		N	X			X		X	N
65	Ovid MEDLINE(R)	Abnormal cutaneous response to mitogens and a contact allergen in dogs with atopic dermatitis.	Veterinary Immunology & Immunopathology. 28(2):97-106, 1991 Apr.	Journal Article Research Support, Non-U.S. Gov't	1991	English	10.1016/0165-2427(91)90132-v	Antigen specific and nonspecific T-lymphocyte activity was evaluated in normal dogs and in dogs with atopic dermatitis by measuring the increase in skin thickness after application of the contact allergen dinitrochlorobenzene and after intradermal injection of the mitogens phytohemagglutinin and concanavalin A. The atopic dogs had a significantly reduced response to the contact allergen (P less t…	Y						N	X					Y	Y						Y						Y	Y						Y							Y
66	Ovid MEDLINE(R)	Atopic disease. [Review] [15 refs]	Seminars in Veterinary Medicine & Surgery (Small Animal). 6(4):290-5, 1991 Nov.	Journal Article Review	1991	English	Click here for full text options		N			X			N			X			N							Y
67	Ovid MEDLINE(R)	Double blind, placebo-controlled, crossover study of evening primrose oil in the treatment of canine atopy.	Veterinary Record. 131(5):97-9, 1992 Aug 01.	Journal Article Research Support, Non-U.S. Gov't	1992	English	Click here for full text options	Thirty-five dogs with non-seasonal atopic dermatitis were used in a double-blind, placebo-controlled crossover study of the effects of evening primrose (Oenothera biennis) oil. There was a significant treatment effect (P less than 0.05) on erythema. An analysis of the changes in plasma phospholipid levels of essential fatty acids revealed a significant (P less than 0.05) rise in linoleic acid con…	N	X					N	X					N							Y
68	Ovid MEDLINE(R)	Atopy and bronchial responsiveness in random population sample of 527 children and adolescents.	Annals of Allergy. 69(2):116-22, 1992 Aug.	Journal Article Research Support, Non-U.S. Gov't	1992	English	Click here for full text options	The relationship between bronchial responsiveness, lung function, and results of skin prick testing was studied in 527 children and adolescents from Copenhagen. All participants completed a questionnaire concerning allergic symptoms (asthma, rhinitis, atopic dermatitis, and urticaria). Furthermore, skin prick test reactivity to nine common aeroallergens, lung function, serum IgE and bronchial res…	N		X				N		X				N							Y
69	Ovid MEDLINE(R)	Effect of environmental factors on the development of allergic disorders in infancy.	Journal of Allergy & Clinical Immunology. 90(2):235-41, 1992 Aug.	Journal Article Research Support, Non-U.S. Gov't	1992	English	Click here for full text options	A total of 1167 infants were followed for 1 year in a population-based prospective study to assess the effect of environmental factors on the development of allergic disorders. Some of these environmental factors are interdependent. Mothers who formula fed their infants smoked more often (p less than 0.001) and tended to belong to lower social classes (p less than 0.01). Logistic regression analy…	N		X				N	X	X				N							Y
70	Ovid MEDLINE(R)	A double-blind comparison of olive oil and a combination of evening primrose oil and fish oil in the management of canine atopy.	Veterinary Record. 131(24):558-60, 1992 Dec 12.	Clinical Trial Comparative Study Journal Article Randomized Controlled Trial	1992	English	Click here for full text options	A randomised double-blind parallel study lasting eight weeks was used to assess the effects of olive oil in a group of atopic dogs whose clinical signs were well controlled by dietary supplementation with a combination of evening primrose oil and fish oil. Nine of the 11 dogs which continued to receive this combination were considered unchanged at the conclusion of the study, whereas eight of the…	N	X					N	X					N							Y
71	Ovid MEDLINE(R)	Evaluation of serum total IgE in Chinese allergic children using different assays.	Allergologia et Immunopathologia. 20(2):51-6, 1992 Mar-Apr.	Comparative Study Journal Article	1992	English	Click here for full text options	Since differences in HLA groups have been found in Chinese populations, as well as differences in the values of total IgE in China, Japan and Thailand, a study has been done in 44 Chinese children, all of them with a history of atopic conditions divided into five groups: asthma, rhinitis, conjunctivitis, allergic bronchitis and atopic dermatitis. 34 of them were positive against D. pteronyssimus,…	N		X				N		X				N							N	X		X
72	Ovid MEDLINE(R)	Serial thyroid hormone concentrations in healthy euthyroid dogs, dogs with hypothyroidism, and euthyroid dogs with atopic dermatitis.	British Veterinary Journal. 148(5):451-8, 1992 Sep-Oct.	Journal Article	1992	English	Click here for full text options	Serum thyroxine (T4) and 3,5,3'-triiodothyronine (T3) concentrations were determined every 3 h for 12 h beginning at 8 a.m. in 20 healthy euthyroid dogs, 19 dogs with hypothyroidism, and 18 euthyroid dogs with atopic dermatitis. Status of thyroid function was based on history, physical findings, results of thyrotropin response testing, and requirement for thyroid hormone replacement therapy. Mean…	N	X					N	X					N							Y
73	Ovid MEDLINE(R)	Efficacy of AHR-13268, an antiallergenic compound, in the management of pruritus caused by atopic disease in dogs.	American Journal of Veterinary Research. 53(4):532-6, 1992 Apr.	Clinical Trial Journal Article Randomized Controlled Trial	1992	English	Click here for full text options	Twenty-nine pruritic, atopic dogs were entered into a double-blind, placebo-controlled, crossover study to evaluate the efficacy of an investigational antiallergenic compound, AHR-13268. Fourteen dogs were evaluated by a veterinary dermatologist (at intervals) and the owner (daily). Fifteen dogs were evaluated only by the owner. The mean (+/- SE) owner scores for pruritus, erythema, and lesions w…	N	X					N	X					N							Y
74	Ovid MEDLINE(R)	Zoonoses of dermatological interest. [Review] [38 refs]	Seminars in Dermatology. 12(1):57-64, 1993 Mar.	Journal Article Review	1993	English	Click here for full text options	The zoonoses are those diseases transmitted from animals to humans. Although commonly thought to be infectious in origin such as scabies or dermatophytosis, inflammatory processes may also be zoonotic. Contact dermatitis may result from allergens being carried from animals to humans. Although the scabies mite is somewhat species specific, various mites sometimes have the opportunity of producing …	N	X		X			N	X		X			N							Y
75	Ovid MEDLINE(R)	[Feed allergy in dogs and cats--not only a gastrointestinal problem]. [Review] [11 refs] [German]	Tierarztliche Praxis. 21(1):53-6, 1993 Feb.	English Abstract Journal Article Review	1993	German	Click here for full text options	Immunologically mediated reactions to foods are responsible for up to 10% of all allergic syndromes in dogs and cats. Skin lesions (pruritus, erythema and papules) represent the main manifestation (70 to 80%) compared to only 10 to 15% incidence of gastrointestinal signs in combination with skin problems or alone. Diarrhea, vomiting, low appetite, chronic weight loss, abdominal pain and lethargy …	N			X			N	X		X	X		N							Y
76	Ovid MEDLINE(R)	Comparison of intradermal allergy test and enzyme-linked immunosorbent assay in dogs with allergic skin disease.	Journal of the American Veterinary Medical Association. 202(5):739-43, 1993 Mar 01.	Comparative Study Journal Article	1993	English	Click here for full text options	Results of an ELISA for allergen-specific IgE were compared with results of an intradermal (ID) allergy test in 5 clinically normal dogs and 36 dogs referred for evaluation of allergic dermatitis. The ELISA had a sensitivity of 100% and a specificity of 0%. Agreement between ID allergy test and ELISA for positive and negative results ranged from 44 to 56% for pollens, 39% for house dust/dust mite…	Y						N	X					Y	Y						Y						Y	N						N	X					X	N
77	Ovid MEDLINE(R)	Diagnosis of food allergy in dogs.	Journal of the American Veterinary Medical Association. 203(2):259-62, 1993 Jul 15.	Journal Article	1993		Click here for full text options	The diagnosis of food allergy was confirmed in 51 dogs while the responsiveness to a 60-day home-cooked restricted dietary trial (elimination-diet trial) was evaluated. The primary clinical sign of allergy detected and evaluated in all dogs was persistent and nonseasonally pruritic skin disease. The duration of time between starting the elimination-diet trial and remission of clinical signs was r…	N	X					N	X					N							Y
78	Ovid MEDLINE(R)	[Ragweed allergy in domestic carnivores: symptoms, diagnosis, treatment]. [French]	Allergie et Immunologie. 25(9):384, 1993 Nov.	Journal Article	1993	French	Click here for full text options	No encontrado	Y						Y						Y	N	X					N	X					N
79	Ovid MEDLINE(R)	Cutaneous late-phase reaction to environmental antigen in patients with atopic dermatitis.	Dermatology. 187(3):182-5, 1993.	Journal Article	1993	English	Click here for full text options	Intradermal testing with 7 environmental allergens was performed on 71 patients with atopic dermatitis (AD) with respiratory atopy (RAT) and 30 pure AD patients, and the cutaneous late-phase reaction (CLPR) was observed several to 48 h after challenge. CLPR was not seen in pure AD. In AD patients with RAT, CLPR was positive in 29 of 71 patients. No macroscopic eczematous lesions appeared. All CLP…	Y						N	X	X				Y	N	X	X				Y						N
80	Ovid MEDLINE(R)	Reactivity of dogs and cats to feeding fleas and to flea antigens injected intradermally.	Australian Veterinary Journal. 70(8):313-4, 1993 Aug.	Journal Article Research Support, Non-U.S. Gov't	1993	English	Click here for full text options	An evaluation of the response at the site of injection of flea antigens is used as a diagnostic test for flea allergy dermatitis (FAD) in dogs (De Boer 1989), although more frequently clinicians diagnose FAD on the clinical presentation of the patient and the response to therapy and flea control. The failure of veterinarians to use skin tests routinely as a diagnostic aid can be partly explained …	Y						N	X					Y	Y						N	X					N
81	Ovid MEDLINE(R)	[Immuno-allergic reactions and hepatic hydatidosis]. [Spanish]	Anales de Medicina Interna. 10(12):618-9, 1993 Dec.	Case Reports Letter	1993	Spanish	Click here for full text options		N	X					N	X					N							N	X
82	Ovid MEDLINE(R)	Familial cutaneous vasculopathy of German shepherds: clinical, genetic and preliminary pathological and immunological studies.	Canadian Veterinary Journal. 35(12):763-9, 1994 Dec.	Journal Article Research Support, Non-U.S. Gov't	1994	English	Click here for full text options	A genodermatosis affecting the German shepherd breed has been recognized in 26 dogs in Ontario since 1991. Clinical signs, first noted in young puppies,are manifested as pyrexia and lethargy. The main cutaneous lesions are footpad swelling and depigmentation,but there is also crusting and ulceration of ear tips and tail tips, and focal depigmentation of the nasal planum. Affected puppies show no …	N	X					N	X					N							N		X
83	Ovid MEDLINE(R)	[Prospective study of a commercial hypoallergenic diet in 18 dogs with food allergy]. [Dutch]	Tijdschrift voor Diergeneeskunde. 119(20):602-4, 1994 Oct 15.	English Abstract Journal Article	1994	Dutch	Click here for full text options	A diagnosis of food allergy was made in eighteen dogs after they were fed on a hypoallergenic diet of lambs meat and rice. The skin complaints returned after the dogs were challenged with the original food. A commercial hypoallergenic diet was given once the skin complaints had disappeared after refeeding of the lamb and rice diet. Six of the eighteen dogs developed skin complaints (pruritus, sca…	N	X					N	X			X		N							N		X
84	Ovid MEDLINE(R)	[Food allergy in dog and cat]. [Review] [15 refs] [Dutch]	Tijdschrift voor Diergeneeskunde. 119(20):599-601, 1994 Oct 15.	English Abstract Journal Article Review	1994	Dutch	Click here for full text options	Food allergy in the dog or cat can only be described as non-seasonal dermatitis accompanied by scratching. When the term 'food allergy' is used, an immune-mediated reaction is not always meant, although the term would suggest that it is. The frequency of occurrence of food allergy is unknown, with the literature giving widely differing percentages. Type I and type IV hypersensitivity reactions pr…	N	X					N	X			X		N							N	X
85	Ovid MEDLINE(R)	Flea allergy dermatitis in dogs diagnosed by intradermal skin tests.	Research in Veterinary Science. 57(1):21-7, 1994 Jul.	Journal Article Research Support, Non-U.S. Gov't	1994	English	Click here for full text options	Thirty-three dogs were categorised according to their clinical signs of flea allergy dermatitis and reactivity to feeding fleas (Ctenocephalides felis felis). A soluble extract of whole fleas (FS), fractions of this extract separated by chromatography, and a commercially available flea antigen extract were used in intradermal skin tests (IDST) to establish the presence or absence of type I and ty…	Y						N	X					Y	Y						N	X					N
86	Ovid MEDLINE(R)	Development of gastroscopic food sensitivity testing in dogs.	Journal of Veterinary Internal Medicine. 8(6):414-22, 1994 Nov-Dec.	Journal Article Research Support, Non-U.S. Gov't	1994	English	Click here for full text options	The aims of this study were to develop a gastroscopic food sensitivity testing (GFST) technique for clinical use in dogs and to determine if the results of GFST were influenced by the feeding of a hypoallergenic diet immediately before the testing period ("unmasking"). The technical requirements for GFST were devised during a total of eight endoscopies performed in four healthy dogs. GFST was per…	N	X					N	X					N							Y
87	Ovid MEDLINE(R)	Atopic dermatitis. [Review] [70 refs]	Clinics in Dermatology. 12(4):565-71, 1994 Oct-Dec.	Journal Article Review	1994	English	Click here for full text options		N			X			N			X			N							N			X
88	Ovid MEDLINE(R)	Evaluation of two enzyme-linked immunosorbent assays for the diagnosis of canine atopy.	Veterinary Record. 135(6):130-3, 1994 Aug 06.	Journal Article Research Support, Non-U.S. Gov't	1994	English	10.1111/j.1439-0442.1993.tb00663.x	Serum samples from 10 dogs without skin disease, 10 with non-atopic pruritic skin disease, and 10 atopic dogs were tested blind by using two enzyme-linked immunosorbent assays (ELISAS) (Veterinary Allergy Test Kit; All-Vet [test A] and Elisarest; Bloxham Laboratories [test B]) designed to detect immunoglobulin E antibodies to environmental allergens. All the dogs tested had at least three positiv…	Y						Y						Y	Y						Y						Y	N						N	X					X	N
89	Ovid MEDLINE(R)	Use of ELISAs for the diagnosis of canine atopy.	Veterinary Record. 135(19):463-4, 1994 Nov 05.	Comment Letter	1994	English	https://pubmed-ncbi-nlm-nih-gov.udea.lookproxy.com/7864950/	Serum samples from 10 dogs without skin disease, 10 with non-atopic pruritic skin disease, and 10 atopic dogs were tested blind by using two enzyme-linked immunosorbent assays (ELISAS) (Veterinary Allergy Test Kit; All-Vet [test A] and Elisarest; Bloxham Laboratories [test B]) designed to detect immunoglobulin E antibodies to environmental allergens. All the dogs tested had at least three positiv…	Y						Y						Y	N	X				X	N					X	N
90	Ovid MEDLINE(R)	Use of ELISAs for the diagnosis of canine atopy.	Veterinary Record. 135(11):264, 1994 Sep 10.	Comment Letter	1994	English	Click here for full text options	Letter to the Editor_x000D_	Y						N					X	Y	N	X		X		X	N	X					N
91	Ovid MEDLINE(R)	Sensitisation to the House Dust Mite, Dermatophagoides farinae, in Dogs with Sarcoptic Mange.	Veterinary Dermatology. 6(4):205-209, 1995 Dec.	Journal Article	1995	English	10.1111/j.1365-3164.1995.tb00066.x	Abstract- Sensitisation to the house dust mite, Dermatophagoides farinae, was demonstrated by skin testing and allergen-specific IgG determination in 15 out of 20 dogs in which a definitive diagnosis of sarcoptic mange was made following recovery of Sarcoptes scabiei mites on skin scrapings. After therapy, no dogs exhibited clinical signs of atopic dermatitis. Intradermal skin testing and 40 per …	Y						N	X					Y	Y						Y						Y	Y						Y							Y
92	Ovid MEDLINE(R)	Australian Case-Control Study of Adverse Reactions to Japanese Encephalitis Vaccine.	Journal of Travel Medicine. 2(3):159-164, 1995 Sep 01.	Journal Article	1995	English	Click here for full text options	Background: Japanese encephalitis (JE) is widely distributed in Asia and is the world's most common aborviral encephalitis. An effective vaccine against JE has been used in Asia for decades without reports of serious adverse reactions. Since 1989, an apparent increase in frequency of allergic reactions to JE vaccine has been reported from a number of nonendemic countries, including Australia. The…	N	X					N	X					N							Y
93	Ovid MEDLINE(R)	Canine atopic disease: therapeutic use of an evening primrose oil and fish oil combination.	Veterinary Record. 137(7):169-70, 1995 Aug 12.	Clinical Trial Journal Article Randomized Controlled Trial	1995	English	Click here for full text options		N	X					N	X					N							N	X
94	Ovid MEDLINE(R)	Hypersensitivity to Japanese cedar (Cryptomeria japonica) pollen in dogs.	Journal of Veterinary Medical Science. 57(4):683-5, 1995 Aug.	Journal Article	1995	English	10.1292/jvms.57.683	Four of 51 dogs with chronic dermatitis were made to react to crude Japanese cedar (Cryptomeria japonica, CJ) pollen allergen by the intradermal skin test (IDST). These four dogs had specific IgE to CJ as determined by Prausnitz-Kustner test. In the provocation test, nasal discharge increased 5 to 20 min after introduction of the crude CJ pollen allergen into the nasal cavities, in two of three d…	Y						N	X					Y	Y						Y						Y	Y						Y							Y
95	Ovid MEDLINE(R)	[A retrospective study in 45 West Highland White Terriers with skin problems]. [Dutch]	Tijdschrift voor Diergeneeskunde. 120(10):292-5, 1995 May 15.	English Abstract Journal Article	1995	Dutch	Click here for full text options	Forty-five West Highland White Terriers with skin problems were studied retrospectively. Two disorders occurred frequently. Food allergy was diagnosed in 11 dogs (24%) and atopy in 9 dogs (20%). It was not possible to differentiate between these disorders on the basis of the history and clinical findings. Other diagnoses were demodectic mange (3), dermatomycosis (2), superficial pyoderma (3) and …	Y						N				X		Y	N	X					Y						N
96	Ovid MEDLINE(R)	N-acetyltransferases: pharmacogenetics and clinical consequences of polymorphic drug metabolism.	Journal of Pharmacokinetics & Biopharmaceutics. 24(5):509-19, 1996 Oct.	Journal Article	1996	English	Click here for full text options	Since the discovery of polymorphic N-acetylation of drugs nearly 40 years ago, great progress has been made in understanding the molecular genetics of acetylation as well as the clinical consequences of being a rapid or slow acetylator. Inborn errors (several different alleles) at the NAT2 locus are responsible for the traditional acetylator polymorphism. Studies have revealed variant alleles at …	N	X					N	X					N							Y
97	Ovid MEDLINE(R)	[Immediate hypersensitivity in the development of contact sensitivity to disinfectant agents]. [Polish]	Medycyna Pracy. 47(6):533-9, 1996.	English Abstract Journal Article	1996	Polish	Click here for full text options	In 53 female health service workers with contact allergy to disinfectants (formaldehyde, glutaraldehyde, benzalkonium, lisoformine) the results of skin prick tests using common environment allergens were analysed, and concentrations of total IgE in blood serum were identified. In 29 (54.7%) persons positive prick tests (Dermatophytes--21, pollens--21, latex--7, domestic dust--5, goose and duck fe…	N	X					N	X			X		N							Y
98	Ovid MEDLINE(R)	[Laboratory animals as a cause of occupational allergy]. [Review] [55 refs] [Polish]	Medycyna Pracy. 47(5):523-31, 1996.	English Abstract Journal Article Research Support, U.S. Gov't, Non-P.H.S. Review	1996	Polish	Click here for full text options	Animal allergens are the strongest occupational allergens which sensitize the respiratory tract. Allergy to the animal is the most important occupational health hazard among people working with experimental animals in university and other research laboratories. The most common manifestations of allergy to laboratory animals are: bronchial asthma, rhinitis, contact urticaria, angioedema and contac…	N	X					N		X		X		N							N		X
99	Ovid MEDLINE(R)	Effects of mold proteases on the biological activity of allergenic pollen extracts.	American Journal of Veterinary Research. 57(10):1447-52, 1996 Oct.	Journal Article Research Support, Non-U.S. Gov't	1996	English	Click here for full text options	OBJECTIVE: To determine the effect of mold extracts with high protease activity on the biological activity of allergenic tree, grass, and weed extracts, using in vivo and in vitro methods, in atopic dogs. ANIMALS: 15 dogs with history and clinical signs of atopy. All dogs had strong positive reactions (3+ or 4+) to 1 or more preselected allergens and negative reactions (O) to molds. PROCEDURE: Mo…	Y						N	X					Y	Y						Y						Y	N						N						X	N
100	Ovid MEDLINE(R)	Subclass profile of allergen-specific IgG antibodies in atopic dogs.	Research in Veterinary Science. 61(2):136-42, 1996 Sep.	Comparative Study Journal Article	1996	English	10.1016/s0034-5288(96)90088-0	Levels of allergen-specific IgE and IgE antibodies were determined in serum samples from 60 atopic and 11 normal dogs by means of commercially available ELISA test kits and a panel of 33 allergens. In the atopic population, IgE antibodies were most commonly identified with a specificity for Dermatophagoides farinae (78.3 per cent of affected dogs), D pteronyssinus (61.6 per cent), mould mix (25 p…	Y						Y						Y	Y						Y						Y	N						Y							Y
101	Ovid MEDLINE(R)	[Different threshold concentrations for sensitization by cattle hair allergen Bos d 2 in atopic and non-atopic farmers]. [German]	Pneumologie. 50(2):177-81, 1996 Feb.	English Abstract Journal Article	1996	German	Click here for full text options	Several threshold values for indoor allergens leading to IgE sensitization were proposed. Currently such values exists for allergens of house dust mite, cat, dog, and cockroach and cattle. A high sensitization is known as an important risk factor in the development of asthma. This study was undertaken to examine threshold values of major cow hair allergen Bos d 2 in the house dust of atopic and n…	N		X				N		X		X		N							N	X
102	Ovid MEDLINE(R)	The significance of reactions to purified fractions of Dermatophagoides pteronyssinus and Dermatophagoides farinae in canine atopic dermatitis.	Veterinary Immunology & Immunopathology. 52(3):147-57, 1996 Jul.	Journal Article	1996	English	10.1016/0165-2427(96)05550-x	The significance of reactions to crude extracts and purified fractions of the house dust mites Dermatophagoides pteronyssinus (Der p I and Der p II) and Dermatophagoides farinae (Der f I and Der f II) was evaluated in dogs with clinical manifestations of atopic dermatitis (AD). In 13 healthy control dogs and eight dogs with AD, immediate skin test reactivity was determined to serial dilutions of …	Y						Y						Y	Y						Y						Y	Y						Y							Y
103	Ovid MEDLINE(R)	Responses of dogs with food allergies to single-ingredient dietary provocation.	Journal of the American Veterinary Medical Association. 209(3):608-11, 1996 Aug 01.	Journal Article	1996	English	Click here for full text options	OBJECTIVE: To characterize specific food ingredients causing allergic reactions in dogs and to assess cross-reactivity between proteins derived from a single animal source or from different plant products. DESIGN: Prospective study. ANIMALS: 25 dogs with histories and cutaneous signs consistent with food-allergic dermatitis. PROCEDURE: Dogs were fed a food-elimination diet until resolution of cli…	N	X					N	X					N							N		X
104	Ovid MEDLINE(R)	Aeroallergen sensitivity of Thai patients with allergic rhinitis.	Asian Pacific Journal of Allergy & Immunology. 15(4):183-5, 1997 Dec.	Journal Article Research Support, Non-U.S. Gov't	1997	English	Click here for full text options	The aim of this study was to determine the aeroallergen sensitivity of allergic rhinitis patients. A total of 100 cases (female: 59, male: 41, aged between 10-59 years, mean age 27.9 years) who were diagnosed with allergic rhinitis by history and clinical presentation, underwent a prick skin test with 30 aeroallergens, and the important sensitizing allergens were assessed. Skin test reactivity sh…	N		X				N	X	X				N							N	X
105	Ovid MEDLINE(R)	[Atopic dermatitis in dogs and cats]. [Dutch]	Tijdschrift voor Diergeneeskunde. 122(24):703-5, 1997 Dec 15.	Journal Article	1997	Dutch	Click here for full text options	No encontrado	Y						N				X		Y	N	X			X		N	X					N
106	Ovid MEDLINE(R)	Auto IgG anti-IgE and IgG x IgE immune complex presence and effects on ELISA-based quantitation of IgE in canine atopic dermatitis, demodectic acariasis and helminthiasis.	Veterinary Immunology & Immunopathology. 60(1-2):33-46, 1997 Dec 12.	Journal Article Research Support, Non-U.S. Gov't	1997	English	10.1016/s0165-2427(97)00119-0	Atopic dermatitis is a common allergic disease manifestation in dogs; however, there is no correlation between clinical disease and detectable total serum IgE. Auto antibodies of the IgG subclass against IgE may affect the detection of serum IgE by immunoassay and may be important in the regulation of IgE production by B cells. ELISA were developed to detect serum antibodies specific for IgE usin…	Y						Y						Y	Y						Y						Y	Y						Y							Y
107	Ovid MEDLINE(R)	Serum and skin IgA concentrations in normal and atopic dogs.	Australian Veterinary Journal. 75(12):906-9, 1997 Dec.	Comparative Study Journal Article Research Support, Non-U.S. Gov't	1997	English	10.1111 /j.1751-0813.1997.tb11264.x	OBJECTIVE: To compare serum and skin surface IgA concentrations from atopic and normal dogs. PROCEDURE: IgA concentrations in sera and skin washings of 20 clinically normal dogs that had no history of pruritus or skin disease were compared to those obtained in 20 dogs with a diagnosis of atopy determined by history, clinical examination and positive intradermal skin test. RESULTS: There was no si…	Y						Y						Y	Y						Y						Y	Y						Y							Y
108	Ovid MEDLINE(R)	Characterization of the cutaneous inflammatory infiltrate in canine atopic dermatitis.	American Journal of Dermatopathology. 19(5):477-86, 1997 Oct.	Comparative Study Journal Article	1997	English	Click here for full text options	Sections from lesional atopic, clinically normal atopic, and normal canine skin were investigated by light microscopy and an immunoperoxidase method using monoclonal antibodies specific for canine leukocyte antigens. We confirmed that skin-infiltrating cells of canine atopic dermatitis are constituted of mast cells, dendritic antigen-presenting cells, memory helper T-lymphocytes, low numbers of e…	Y						Y						Y	N	X					Y						Y	N			X			N			X			X	N
109	Ovid MEDLINE(R)	German shepherd dog pyoderma: a prospective study of 12 dogs.	Journal of the American Animal Hospital Association. 33(4):355-63, 1997 Jul-Aug.	Journal Article	1997	English	Click here for full text options	Twelve German shepherd dogs, each diagnosed as having a recurrent or refractory deep pyoderma (i.e., German shepherd dog pyoderma [GSP]), were evaluated for several parameters over a six-year period. Results indicated that GSP could be associated with flea allergy dermatitis, atopic dermatitis, food allergy, cell-mediated immunodeficiency, or hypothyroidism, or could be an idiopathic disease. The…	N	X					N	X					N							N		X
110	Ovid MEDLINE(R)	Effect of an omega-3/omega-6 fatty acid-containing commercial lamb and rice diet on pruritus in atopic dogs: results of a single-blinded study.	Canadian Journal of Veterinary Research. 61(2):145-53, 1997 Apr.	Clinical Trial Journal Article Randomized Controlled Trial Research Support, Non-U.S. Gov't	1997	English	Click here for full text options	A commercial, lamb and rice, dog food with an omega-6:omega-3 fatty acid ratio of 5.5:1 was fed in a single-blinded, self-controlled clinical trial to 18 atopic dogs. The pruritus in 8 of these dogs (44.4%) was satisfactorily controlled within 7 to 21 d, returned within 3 to 14 d after the diet was withdrawn, and was again controlled when the diet was reinstated. Plasma and skin levels of examine…	N	X					N	X					N							Y
111	Ovid MEDLINE(R)	Effect of H1-antihistamines on histamine release from dispersed canine cutaneous mast cells.	American Journal of Veterinary Research. 58(3):293-7, 1997 Mar.	Journal Article Research Support, Non-U.S. Gov't	1997	English	Click here for full text options	OBJECTIVE: Because of the implication of histamine in canine atopic dermatitis, H1-antihistamines may provide a valid alternative to glucocorticoid therapy. In vitro study of these drugs prior to clinical testing can allow the most promising compounds to be selected for trials and render trials with drugs of doubtful efficacy unnecessary. SAMPLE POPULATION: Isolated canine cutaneous mast cells. P…	N	X					N	X					N							Y
112	Ovid MEDLINE(R)	The atopic dog: a model for food allergy.	Laboratory Animal Science. 47(1):40-9, 1997 Feb.	Journal Article	1997	English	Click here for full text options	The renewed interest in food allergy and its investigation has been hampered by the lack of an appropriate animal model with similar comparative aspects of form and function relative to humans. Therefore we have been characterizing an inbred colony of high immunoglobulin E-producing dogs that were immunized subcutaneously with food antigen extracts in alum and that developed clinical manifestatio…	N	X					Y	Y	Y	Y	Y	Y	Y	N	X					N	X					N
113	Ovid MEDLINE(R)	Double-blind pilot study on the effects of ketoconazole on intradermal skin test and leukotriene C4 concentration in the skin of atopic dogs.	Veterinary Dermatology. 8(1):3-10, 1997 Mar.	Journal Article	1997	English	Click here for full text options	Abstract The effects of ketoconazole on intradermal skin test results and on leukotriene C4 (LTC4 ) concentration in the skin of atopic dogs were evaluated in a pilot study. Twelve atopic dogs without a detectable Malassezia dermatitis were selected. All dogs had positive immediate reaction to intradermal injection of house dust mite (HDM) at 25 PNU mL-1 . Six dogs received a control sugar tablet…	N	X					N	X					N							N	X
114	Ovid MEDLINE(R)	Allergen-specific IgE and IgGd antibodies in atopic and normal dogs.	Veterinary Immunology & Immunopathology. 66(3-4):203-23, 1998 Dec 11.	Journal Article Research Support, Non-U.S. Gov't	1998	English	Click here for full text options	Intradermal skin tests (IDSTs) were performed on 65 atopic and 24 normal dogs. The levels of allergen-specific IgE and IgGd antibodies were determined in serum samples by enzyme-linked immunosorbent assay (ELISA) using the same 12 allergens that were used in the IDST on normal dogs. The correlation between the levels of IgE and IgGd to Dermatophagoides farinae (DF) and Dermatophagoides pteronyssi…	Y						Y						Y	Y						Y						Y	Y						Y							Y
115	Ovid MEDLINE(R)	Atopic dermatitis in early infancy predicts allergic airway disease at 5 years.	Clinical & Experimental Allergy. 28(8):965-70, 1998 Aug.	Journal Article Multicenter Study Research Support, Non-U.S. Gov't	1998	English	Click here for full text options	BACKGROUND: Screening tests for atopy risk in newborns have a low predictive value. If early atopic symptoms and signs could be used as predictors for the next expected atopic disorder then secondary prevention could be employed. The aim of this study was to evaluate the capacity of early atopic dermatitis to predict aeroallergen sensitization and the manifestation of respiratory atopic disorders…	N		X				N	X	X				N							N	X
116	Ovid MEDLINE(R)	[Significance and possibilities of histopathologic diagnosis in breed-specific skin diseases]. [Review] [13 refs] [German]	Tierarztliche Praxis. Ausgabe K, Kleintiere/Heimtiere. 26(4):247-58, 1998 Jul.	English Abstract Journal Article Review	1998	German	Click here for full text options	An increasing number of punch biopsies is submitted for histopathology. Results are often disappointing for the veterinary pathologist as well as the referring veterinarian. Inappropriate timing of sampling, selection and preparation of the biopsy site, type of biopsy, biopsy technique and fixation as well as incomplete histories often contribute to insufficient diagnosis and interpretation of sk…	N			X			N		X	X	X		N							N	X
117	Ovid MEDLINE(R)	Type-1 hypersensitivity reactions to Malassezia pachydermatis extracts in atopic dogs.	American Journal of Veterinary Research. 59(7):836-41, 1998 Jul.	Journal Article Research Support, Non-U.S. Gov't	1998	English	Click here for full text options	OBJECTIVE: To investigate the potential allergenic role of the yeast Malassezia pachydermatis in dogs with clinical diagnosis of atopic dermatitis. ANIMALS: 5 clinically normal nonatopic dogs, 10 atopic dogs with cytologic evidence of Malassezia dermatitis, and 12 atopic dogs without cytologic evidence of Malassezia dermatitis. PROCEDURE: A crude yeast extract was produced by disrupting the cell …	Y						Y						Y	Y						Y						Y	N						N						X	N
118	Ovid MEDLINE(R)	Comparison between IMMUNODOT tests and the intradermal skin test in atopic dogs.	Veterinary Dermatology. 9(3):201-205, 1998 Sep.	Journal Article	1998	English	Click here for full text options	This study evaluated a new perspective in the diagnosis of dermatitis in dogs with signs suggestive of allergic skin disease. The results obtained with CMG IMMUNODOT tests using the technique of allergen-specific strip tests, as employed for human allergy diagnosis, were compared with those obtained by the intradermal skin test (IDST). Forty-eight cases completed the diagnostic evaluation, which …	Y						Y						Y	Y						Y						Y	Y						Y							Y
119	Ovid MEDLINE(R)	Comparison of two diagnostic tests for canine atopy using monoclonal anti-IgE antibodies.	Veterinary Dermatology. 9(3):191-199, 1998 Sep.	Journal Article	1998	English	Click here for full text options	In 66 dogs of various races consulting the veterinary clinic for skin problems suspicious of atopic dermatitis, parallel skin tests with two commercial brands of allergens and serological tests with the CMG IMMUNODOT system and with an ELISA assay using monoclonal anti-IgE antibodies were performed. The most frequent sensitivities found were towards house dust (44%) and storage mites (50%). Depen…	Y						Y						Y	Y						Y						Y	Y						Y							Y
120	Ovid MEDLINE(R)	[Keeping dogs indoor aggravates infantile atopic dermatitis]. [Japanese]	Arerugi - Japanese Journal of Allergology. 48(12):1309-15, 1999 Dec.	Case Reports English Abstract Journal Article	1999	Japanese	Click here for full text options	We had a two-month-old girl with severe dermatitis since birth. Her serum RAST to HD, Df and Dp were 1.06, 0.03 and 0.01 Ua/ml respectively. A Yorkshire terrier were kept at her mother's parents' home where the patient had lived for a month since birth. Her eczema, which became markedly aggravated whenever she visited there, improved after the elimination of the dog. We investigated the relations…	N		X				N		X		X		N							Y
121	Ovid MEDLINE(R)	Advances in the diagnosis and treatment of atopy. [Review] [31 refs]	Veterinary Clinics of North America - Small Animal Practice. 29(6):1437-47, 1999 Nov.	Journal Article Review	1999	English	Click here for full text options	Regarding the diagnosis of atopy, the emphasis in this article has been on how to use the initial history and physical examination findings to lead the clinician towards this diagnosis. After a systematic approach to the differential diagnosis of pruritus in the dog has been completed, the diagnosis of atopy can be further evaluated using one of the specific allergy tests available. The author's …	N			X			N			X			N							Y
122	Ovid MEDLINE(R)	Putative salivary allergens of the cat flea, Ctenocephalides felis felis.	Veterinary Immunology & Immunopathology. 69(2-4):229-37, 1999 Aug 02.	Journal Article Research Support, Non-U.S. Gov't	1999	English	Click here for full text options	The cat flea, Ctenocephalides felis felis, is the major initiator of flea bite hypersensitivity in dogs. Previous analyses of whole extracts of the flea and flea salivary secretions have failed to identify the allergens responsible. We dissected >2000 salivary glands from adult female fleas, extracted them into buffered saline containing protease inhibitors and fractionated the extract using gel …	Y						N	X	X				Y	Y						N	X					N
123	Ovid MEDLINE(R)	Canine atopic dermatitis in Greece: clinical observations and the prevalence of positive intradermal test reactions in 91 spontaneous cases.	Veterinary Immunology & Immunopathology. 69(1):61-73, 1999 Jul 01.	Journal Article	1999	English	Click here for full text options	Atopic dermatitis was diagnosed in a total of 91 dogs by combining the compatible historical evidence and clinical signs with the presence of one or more positive intradermal test reactions well correlated with the exposure to the aeroallergens and the seasonality of the clinical signs. Compared to the general hospital population Yorkshire terriers, Chinese Shar-Peis and cocker spaniels showed a …	Y						Y						Y	Y						Y						Y	Y						Y							Y
124	Ovid MEDLINE(R)	Eosinophilic dermatitis with edema in nine dogs, compared with eosinophilic cellulitis in humans.	Journal of the American Veterinary Medical Association. 215(5):649-53, 1999 Sep 01.	Case Reports Comparative Study Journal Article	1999	English	Click here for full text options	A unique eosinophilic dermatitis with edema in dogs is characterized by extremely erythematous coalescing macules and plaques with associated edema, and is similar to eosinophilic cellulitis (Wells' syndrome) in humans. Histopathologic features include a profound eosinophilic dermal infiltrate, focal areas of collagen fiber degeneration surrounded by eosinophils (flame figures), dilated vessels, …	N	X					N	X					N							N	X
125	Ovid MEDLINE(R)	Comparison of intradermal testing and serum testing for allergen-specific IgE using monoclonal IgE antibodies in 84 atopic dogs.	Australian Veterinary Journal. 77(5):290-4, 1999 May.	Comparative Study Journal Article	1999	English	Click here for full text options	OBJECTIVE: To compare an ELISA measuring serum allergen-specific IgE with intradermal skin testing in canine atopic dermatitis. PROCEDURE: Eighty-four dogs with the clinical diagnosis of atopic dermatitis underwent intradermal skin testing and serum testing for allergen-specific IgE. Tests were performed in a blinded fashion. Positive reactions were compared and the sensitivity and specificity of…	Y						Y						Y	Y						Y						Y	Y						Y							Y
126	Ovid MEDLINE(R)	A blinded, placebo-controlled study of the efficacy of borage seed oil and fish oil in the management of canine atopy.	Veterinary Record. 144(15):405-7, 1999 Apr 10.	Clinical Trial Journal Article Randomized Controlled Trial	1999	English	Click here for full text options	Twenty-one dogs with atopy were entered into a blinded, placebo-controlled study lasting eight weeks. They were randomly divided into three groups and were all given supplementary oils orally once daily. The dogs in groups A and B were given borage seed oil and fish oil in combination (Viacutan; Boehringer Ingelheim Vetmedica) to provide 176 mg/kg or 88 mg/kg borage seed oil respectively. The dog…	N	X					N	X					N							N	X
127	Ovid MEDLINE(R)	Occupational allergy to animals. [Review] [130 refs]	Occupational Medicine. 14(2):285-304, 1999 Apr-Jun.	Journal Article Review	1999	English	Click here for full text options	This chapter reviews the epidemiology, manifestations, etiologic agents, and exposure controls related to occupational allergies from animals and insects, including both respiratory and dermatologic responses. The overall prevalence of allergic respiratory symptoms in exposed workers is about 23% 4-9% of exposed individuals develop asthma. Symptom development is related to duration and intensity …	N		X	X			N		X	X			N							N		X
128	Ovid MEDLINE(R)	Allergies and vocal fold edema: a preliminary report.	Journal of Voice. 13(1):113-22, 1999 Mar.	Journal Article	1999	English	Click here for full text options	This paper describes different tools to rule out the etiology of vocal fold edema. A complete voice assessment is used in our Voice Center. This includes patient history, acoustic analysis, laryngeal video-stroboscopy, otolaryngology consultation, allergy testing from our Allergy Clinic, and gastroenterology consultation as appropriate. Inhalant allergy can be a hidden, yet very common cause of c…	N		X				N	X					N							Y
129	Ovid MEDLINE(R)	Mast cell density and subtypes in the skin of dogs with atopic dermatitis.	Journal of Comparative Pathology. 120(2):187-97, 1999 Feb.	Comparative Study Journal Article	1999	English	https://doi.org/10.1053/jcpa.1998.0270	Skin biopsies from seven dogs with atopic dermatitis and 13 dogs with no clinical or histological evidence of skin diseases were examined. The study of the atopic dogs included 11 biopsy samples of nonlesional skin and 15 samples of lesional skin. One section of each tissue sample was stained with haematoxylin and eosin and another with toluidine blue to demonstrate the sulphated acid glycosamino…	Y						Y						Y	N	X					Y						Y	N						Y							N
130	Ovid MEDLINE(R)	Serum immunoglobulin E concentrations in West Highland White Terrier puppies do not predict development of atopic dermatitis.	Veterinary Dermatology. 10(4):275-281, 1999 Dec.	Journal Article	1999	English	Click here for full text options	Sera from 154 West Highland White Terrier puppies between 6 and 12 weeks of age were assayed for total IgE using a sandwich ELISA method. Development of clinical signs of atopic dermatitis in these dogs was monitored by use of an annual owner questionnaire, until the dog reached 3 years of age. Of 114 evaluated dogs, skin disease severe enough to warrant veterinary examination was reported in 52 …	Y						Y						Y	Y						Y						Y	N						N	X						N
131	Ovid MEDLINE(R)	Effects of a 1 per cent hydrocortisone conditioner on the prevention of immediate and late-phase reactions in canine skin.	Veterinary Record. 147(26):739-42, 2000 Dec 23-30.	Clinical Trial Journal Article Randomized Controlled Trial Research Support, Non-U.S. Gov't	2000	English	Click here for full text options	Ten laboratory beagles were used to determine whether a 1 per cent hydrocortisone conditioner applied topically for three consecutive days would inhibit IgE-mediated immediate and late-phase reactions induced in their skin. The trial was blinded, controlled with the product's vehicle and designed with a crossover. It consisted of three phases: one period without treatment (control phase) and two …	N	X					N	X					N							N		X
132	Ovid MEDLINE(R)	Prevalence and predictors of rhinitis in Danish children and adolescents.	Allergy. 55(11):1019-24, 2000 Nov.	Journal Article Research Support, Non-U.S. Gov't	2000	English	Click here for full text options	BACKGROUND: The prevalence of self-reported symptoms of allergic rhinitis is increasing in many countries, but the reasons for this trend are not well understood. Data from a 6-year follow-up study of a population sample of children and adolescents (n=408), aged 7-17 years at enrolment in 1986, were analyzed to investigate the prevalence and predictors of self-reported rhinitis. METHODS: Case his…	N	X	X				N	X	X				N							Y
133	Ovid MEDLINE(R)	Identification, cloning, and characterization of a major cat flea salivary allergen (Cte f 1).	Molecular Immunology. 37(7):361-75, 2000 May.	Journal Article	2000	English	Click here for full text options	An 18 kDa protein isolated from saliva of the cat flea, Ctenocephalides felis, elicits a positive intradermal skin test (IDST) in 100 and 80% of experimental and clinical flea allergic dogs, respectively. Using solid-phase enzyme-linked immuno assay (ELISA), this protein detected IgE in 100 and 80% of experimental and clinical flea allergic dogs, respectively. A cDNA (pFSI) encoding a full-length…	N	X					N	X	X				N							N	X
134	Ovid MEDLINE(R)	[Atopic dermatitis and domestic animals]. [Review] [13 refs] [French]	Revue Medicale de Bruxelles. 21(4):A251-4, 2000 Sep.	English Abstract Journal Article Review	2000	French	Click here for full text options	Several arguments are raised attributing to aeroallergens an important role in atopic dermatitis. The aeroallergens that penetrate the epidermis could be fixed by IgE on the Langerhans cells and then induce a cellular mediator reaction comparable to that of allergic contact eczema. Patch tests have been developed to evaluate the role of aeroallergens (dust mites, animal dander, etc.). Preventive …	N			X			N			X			N							N	X
135	Ovid MEDLINE(R)	In vivo and in vitro tests showing sensitization to Japanese cedar (Cryptomeria japonica) pollen allergen in atopic dogs.	Journal of Veterinary Medical Science. 62(9):995-1000, 2000 Sep.	Journal Article Research Support, Non-U.S. Gov't	2000	English	Click here for full text options	Using both in vivo and in vitro tests, dogs with atopic dermatitis were examined for sensitization with Japanese cedar (Cryptomeria japonica, CJ) pollen allergen. Ten dogs with clinical manifestation of atopic dermatitis were shown to be sensitized to CJ pollen based on the results of intradermal skin test and serum antigen-specific IgE test. In vitro lymphocyte stimulation test showed blastogeni…	Y						Y						Y	Y						Y						Y	Y						Y							Y
136	Ovid MEDLINE(R)	Comparison of response to immunotherapy by intradermal skin test and antigen-specific IgE in canine atopy.	Journal of Veterinary Medical Science. 62(9):983-8, 2000 Sep.	Clinical Trial Journal Article Research Support, Non-U.S. Gov't	2000	English	Click here for full text options	The intradermal skin test (IDST) and serologic allergy test (SAT) has been developed for confirming a diagnosis of canine atopy and determining allergens for immunotherapy. To determine the prevalence of causative allergens for canine atopic dermatitis in Japan, IDST and SAT were performed with the CMG Immunodot strips on 95 atopic dogs using 9 allergens. In addition, we compared agreement rate, …	Y						N	X					Y	Y						Y						Y	Y						Y							Y
137	Ovid MEDLINE(R)	Reactivity to intradermal injection of extracts of Dermatophagoides farinae, Dermatophagoides pteronyssinus, house dust mite mix, and house dust in dogs suspected to have atopic dermatitis: 115 cases (1996-1998).	Journal of the American Veterinary Medical Association. 217(4):536-40, 2000 Aug 15.	Comparative Study Journal Article	2000	English	Click here for full text options	OBJECTIVE: To compare reactivities to intradermal injection of extracts of Dermatophagoides farinae, Dermatophagoides pteronyssinus, house dust mite mix, and house dust in dogs suspected to have atopic dermatitis. DESIGN: Retrospective study. ANIMALS: 115 dogs. PROCEDURES: Records of all dogs suspected to have atopic dermatitis that underwent intradermal testing between October 1996 and July 1998…	Y						Y						Y	Y						Y						Y	Y						Y							Y
138	Ovid MEDLINE(R)	Similar prevalence of respiratory symptoms and atopy in Estonian schoolchildren with changing lifestyle over 4 yrs.	European Respiratory Journal. 16(1):86-90, 2000 Jul.	Journal Article Research Support, Non-U.S. Gov't	2000	English	Click here for full text options	The prevalence of allergic sensitization and clinical manifestations is low in Eastern Europe, despite a continuous increase in industrialized countries with a market economy. The aim of the present study was to study changes in the prevalence of respiratory symptoms and atopic sensitization over time among schoolchildren in Estonia, in relation to environmental changes as the country transformed…	N		X				N	X	X				N							Y
139	Ovid MEDLINE(R)	Aero-allergens in canine atopic dermatitis in southeastern Australia based on 1000 intradermal skin tests.	Australian Veterinary Journal. 78(6):392-9, 2000 Jun.	Journal Article	2000	English	Click here for full text options	OBJECTIVE: To determine the most relevant aero-allergens involved in canine atopic dermatitis in southeastern Australia and provide information about these aero-allergens to the general practitioner. PROCEDURE: Dogs presented to the Animal Skin & Allergy Clinic with history and clinical signs of atopic dermatitis were injected intradermally with 38 different allergens and negative and positive co…	Y						Y						Y	Y						Y						Y	Y						Y							Y
140	Ovid MEDLINE(R)	Positive reactions to common allergens in 42 atopic dogs in Japan.	Veterinary Immunology & Immunopathology. 73(2):193-204, 2000 Feb 25.	Journal Article Research Support, Non-U.S. Gov't	2000	English	Click here for full text options	Clinically important allergens for the diagnosis and treatment of atopic dermatitis vary geographically. In order to identify the most prevalent allergens in atopic dogs in Japan, 42 dogs with a clinical diagnosis of atopy were tested using both in vivo (intradermal skin test (IDST)) and in vitro (antigen-specific IgE assay) allergy tests. Allergens used for IDST included 26 allergen extracts fro…	Y						Y						Y	Y						Y						Y	Y						Y							Y
141	Ovid MEDLINE(R)	Rash after visiting Tucson.	Dermatology Online Journal. 7(2):10, 2001 Dec.	Case Reports Journal Article	2001	English	Click here for full text options	Cactus dermatitis is a common problem among harvesters of cactus fruit. The smaller spines (glochidia) are responsible for most of the dermatitis. Easily separated from the body of the plant, the glochidia may be transferred to bystanders through contact with clothing or pets exposed to these cacti. Removal of the glochidia from the skin is key to treatment, and household glue may aid in this ext…	N	X					N	X					N							Y
142	Ovid MEDLINE(R)	Epidermal dysplasia and Malassezia infection in two West Highland White Terrier siblings: an inherited skin disorder or reaction to severe Malassezia infection?.	Veterinary Dermatology. 12(5):285-90, 2001 Oct.	Case Reports Journal Article	2001	English	Click here for full text options	Two 9-month-old West Highland White Terrier siblings were referred to our clinic with pruritus, alopecia and lichenification. Cytological examination of Scotch tape strippings revealed Malassezia organisms and cocci. Skin biopsy specimens showed epidermal dysplasia. Treatment included bathing with a 2% miconazole/chlorhexidine-containing shampoo, orally administered ketoconazole (5 mg kg-1, every…	N	X					N	X					N							N	X
143	Ovid MEDLINE(R)	A randomized, double-blind, placebo-controlled trial to investigate the efficacy and safety of a Chinese herbal product (P07P) for the treatment of canine atopic dermatitis.	Veterinary Dermatology. 12(5):265-74, 2001 Oct.	Clinical Trial Journal Article Randomized Controlled Trial Research Support, Non-U.S. Gov't	2001	English	Click here for full text options	A randomized, double-blind, placebo-controlled trial of P07P, a product derived from a traditional Chinese herbal remedy, was undertaken in 50 dogs with atopic dermatitis. Owners recorded a daily itch score for 4-14 days before treatment and during treatment. Packets of powder containing P07P or placebo were added to the food once daily for 8 weeks. Dogs were assessed for erythema, surface damage…	N	X					N	X					N							N	X
144	Ovid MEDLINE(R)	Serum antibodies to Malassezia yeasts in canine atopic dermatitis.	Veterinary Dermatology. 12(6):327-32, 2001 Dec.	Journal Article Research Support, Non-U.S. Gov't	2001	English	Click here for full text options	Significant numbers of humans with atopic dermatitis develop Malassezia-specific IgE. Immediate skin-test reactivity to Malassezia has been demonstrated in atopic dogs. The aim of this study was to compare the serum IgG and IgE response to Malassezia in atopic dogs with and without clinical evidence of Malassezia dermatitis and/or otitis, nonatopic dogs with clinical evidence of Malassezia dermat…	Y						Y						Y	Y						Y						Y	N						Y							N
145	Ovid MEDLINE(R)	Canine and feline atopic dermatitis: a review of the diagnostic options. [Review] [11 refs]	Clinical Techniques in Small Animal Practice. 16(4):230-2, 2001 Nov.	Journal Article Review	2001	English	Click here for full text options	Atopic dermatitis is an inherited pruritic skin disease in dogs and cats. This pruritic skin condition is due to the animal having an allergic reaction to environmental allergens. The environmental allergens that an individual dog or cat is allergic to are specific for that individual animal. Management options for affected dogs and cats include identification of the offending environmental aller…	N			X			N			X			N							N			X
146	Ovid MEDLINE(R)	Development of allergy and IgE antibodies during the first five years of life in Estonian children.	Clinical & Experimental Allergy. 31(12):1854-61, 2001 Dec.	Comparative Study Journal Article Research Support, Non-U.S. Gov't	2001	English	Click here for full text options	BACKGROUND: Epidemiological studies have demonstrated a low prevalence of allergic diseases and atopic sensitization among schoolchildren and young adults in the formerly socialist countries of Central and Eastern Europe as compared to Western Europe. OBJECTIVE: The aim of our study was to prospectively investigate IgE responses to food and inhalant allergens and the development of allergy during…	N		X				N	X	X				N							N	X				X
147	Ovid MEDLINE(R)	Exposure to endotoxin decreases the risk of atopic eczema in infancy: a cohort study.	Journal of Allergy & Clinical Immunology. 108(5):847-54, 2001 Nov.	Journal Article Research Support, Non-U.S. Gov't	2001	English	Click here for full text options	BACKGROUND: Previous studies have shown a protective effect of early exposure to cats and dogs on the development of atopic eczema, asthma, allergic rhinitis, and atopic sensitization in later life. In particular, a higher microbial exposure to endotoxin in early childhood might contribute to this effect. OBJECTIVE: We examined the associations between bacterial endotoxin in house dust and atopic…	N		X				N	X	X				N							N		X
148	Ovid MEDLINE(R)	Sensitization and cross-reaction patterns in Danish Compositae-allergic patients.	Contact Dermatitis. 45(4):197-204, 2001 Oct.	Journal Article	2001	English	Click here for full text options	Results of aimed patch testing with constituents of sesquiterpene lactone (SL) mix, Compositae mix (CM) and other Compositae extracts and allergens in 190 Compositae-allergic patients detected in an 8-year period are presented. Feverfew of CM elicited positive reactions most frequently, followed by tansy, wild chamomile, yarrow and arnica, whereas dehydrocostus lactone of SL was the most frequent…	N		X				N		X				N							Y
149	Ovid MEDLINE(R)	Examination of faecal samples as a method of identifying pollen exposure in dogs.	Veterinary Record. 149(14):424-6, 2001 Oct 06.	Evaluation Study Journal Article Research Support, Non-U.S. Gov't	2001	English	Click here for full text options	SHORT COMMUNICATIONS_x000D_	Y						Y						Y	N	X		X			N			X			N
150	Ovid MEDLINE(R)	IgE reactivity and cross-reactivity to Japanese cedar (Cryptomeria japonica) and cypress (Chamaecyparis obtusa) pollen allergens in dogs with atopic dermatitis.	Veterinary Immunology & Immunopathology. 83(1-2):69-77, 2001 Nov.	Journal Article	2001	English	Click here for full text options	The natural occurrence of Japanese cedar (Cryptomeria japonica) pollinosis has been reported in dogs with atopic dermatitis. However, the reactivity to Japanese cypress (Chamaecyparis obtusa) pollen allergens in these dogs has not been reported. The present study was designed to investigate the reactivity to Japanese cypress pollen allergens in dogs sensitized to Japanese cedar pollen allergens. …	Y						Y						Y	Y						Y						Y	N						Y							N
151	Ovid MEDLINE(R)	Peripheral blood mononuclear cell responses to Dermatophagoides farinae in canine atopic dermatitis.	Veterinary Immunology & Immunopathology. 82(3-4):273-80, 2001 Oct.	Journal Article Research Support, Non-U.S. Gov't	2001	English	Click here for full text options	Atopic dermatitis is a chronic inflammatory and pruritic skin disease commonly seen in dogs and humans that is characterised by the presence of allergen-specific IgE. Data from skin tests and serological analysis suggest that the house dust mite Dermatophagoides farinae is the most important allergen in dogs with atopic dermatitis. The aim of this study was to determine if D. farinae specific per…	Y						Y						Y	Y						Y						Y	N						Y							N
152	Ovid MEDLINE(R)	The ACVD task force on canine atopic dermatitis (XVIII): histopathology of skin lesions. [Review] [12 refs]	Veterinary Immunology & Immunopathology. 81(3-4):305-9, 2001 Sep 20.	Journal Article Review	2001	English	Click here for full text options	For years, the histopathology of skin lesions of canine atopic dermatitis was deemed non-specific for this diagnosis. However, more recent studies have established that canine atopic skin lesions exhibit an inflammatory pattern characterized as a chronic, hyperplastic and spongiotic, mixed perivascular dermatitis. The nature of epidermal and dermal inflammatory cell infiltrates has now been chara…	N			X			N			X			N							Y
153	Ovid MEDLINE(R)	The ACVD task force on canine atopic dermatitis (XVII): intradermal testing. [Review] [79 refs]	Veterinary Immunology & Immunopathology. 81(3-4):289-304, 2001 Sep 20.	Journal Article Review	2001	English	Click here for full text options	Intradermal testing has been practiced for decades in human and veterinary medicine. The primary utility of intradermal testing is in the demonstration of IgE-mediated allergen hypersensitivity. The presence of a positive reaction on an intradermal test is not always indicative of allergy, as it may sometimes be an indication of sub-clinical hypersensitivity. Despite its widespread use by veterin…	N			X			N			X			N							Y
154	Ovid MEDLINE(R)	The ACVD task force on canine atopic dermatitis (XVI): laboratory evaluation of dogs with atopic dermatitis with serum-based "allergy" tests. [Review] [41 refs]	Veterinary Immunology & Immunopathology. 81(3-4):277-87, 2001 Sep 20.	Journal Article Review	2001	English	Click here for full text options	Serum-based in vitro "allergy tests" are commercially available to veterinarians, and are widely used in diagnostic evaluation of a canine atopic patient. Following initial clinical diagnosis, panels of allergen-specific IgE measurements may be performed in an attempt to identify to which allergens the atopic dog is hypersensitive. Methodology for these tests varies by laboratory; few critical st…	N			X			N			X			N							Y
155	Ovid MEDLINE(R)	The ACVD task force on canine atopic dermatitis (XV): fundamental concepts in clinical diagnosis. [Review] [20 refs]	Veterinary Immunology & Immunopathology. 81(3-4):271-6, 2001 Sep 20.	Comparative Study Journal Article Review	2001	English	Click here for full text options	The clinical signs of atopic dermatitis (AD) in man and in dogs are variable, and there is no single physical or historical feature that, if present, indicates the presence of AD. The initial diagnosis of AD is made clinically with the fulfillment of a combination of criteria that are strongly associated with the disease. Several schemes have been proposed in an attempt to define uniform clinical…	N			X			N			X			N							Y
156	Ovid MEDLINE(R)	The ACVD task force on canine atopic dermatitis (XIV): clinical manifestations of canine atopic dermatitis. [Review] [30 refs]	Veterinary Immunology & Immunopathology. 81(3-4):255-69, 2001 Sep 20.	Journal Article Review	2001	English	Click here for full text options	Canine atopic diseases, including those with skin lesions, have been described for many years. Unfortunately, early descriptions often failed to establish definitive guidelines for considering a patient atopic, and criteria for diagnosing atopic dermatitis (AD) have varied from author to author. Larger case-series published from the 1960s to the 1980s suggested that the most common clinical manif…	N			X			N			X			N							N	X
157	Ovid MEDLINE(R)	The ACVD task force on canine atopic dermatitis (VI): IgE-induced immediate and late-phase reactions, two inflammatory sequences at sites of intradermal allergen injections. [Review] [23 refs]	Veterinary Immunology & Immunopathology. 81(3-4):199-204, 2001 Sep 20.	Journal Article Review	2001	English	Click here for full text options	Intradermal testing is a common diagnostic procedure used in the evaluation of dogs with suspected atopic dermatitis (AD). To do this, most investigators assess the appearance of wheals that develop at the sites of intradermal allergen injections. However, wheals are rarely seen in dogs with naturally occurring AD. Furthermore, infiltration of inflammatory cells into the injection sites can occur…	N			X			N			X			N							N	X
158	Ovid MEDLINE(R)	The ACVD task force on canine atopic dermatitis (IV): environmental allergens. [Review] [89 refs]	Veterinary Immunology & Immunopathology. 81(3-4):169-86, 2001 Sep 20.	Comparative Study Journal Article Review	2001	English	Click here for full text options	Numerous environmental allergens have been incriminated in the pathogenesis of canine atopic dermatitis (AD). These include dust and storage mite antigens, house dust, pollens from grasses, trees and weeds, mould spores, epidermal antigens, insect antigens, and miscellaneous antigens such as kapok. In this paper, we review the literature concerning the allergens that have been reported to contrib…	N			X			N			X			N							N		X
159	Ovid MEDLINE(R)	Double-blinded, placebo-controlled, cross-over pilot study on the efficacy of zileuton for canine atopic dermatitis.	Veterinary Dermatology. 12(4):189-95, 2001 Aug.	Clinical Trial Journal Article Randomized Controlled Trial Research Support, Non-U.S. Gov't	2001	English	Click here for full text options	Nine dogs meeting the diagnostic criteria for canine atopic dermatitis were enrolled in a double-blind, placebo-controlled, cross-over clinical trial. In this pilot study, zileuton (a 5-lipoxygenase inhibitor) given orally at 2 mg kg(-1) three times daily for 4 weeks significantly decreased erythema in dogs with atopic dermatitis but had no effect on pruritus. Zileuton was well tolerated and no a…	N	X					N	X					N							Y
160	Ovid MEDLINE(R)	Sensitization to common allergens and its association with allergic disorders at age 4 years: a whole population birth cohort study.	Pediatrics. 108(2):E33, 2001 Aug.	Journal Article Research Support, Non-U.S. Gov't	2001	English	Click here for full text options	BACKGROUND: Atopy is defined as the genetic propensity to develop immunoglobulin E antibodies in response to exposure to allergens and assessed by skin prick test responses to common allergens. Although it is generally agreed that atopy is an important risk factor for allergic diseases such as asthma, rhinitis, and eczema, the extent to which atopy accounts for these diseases is controversial. OB…	N		X				N		X				N							N		X
161	Ovid MEDLINE(R)	Intradermal skin test reactivity to histamine and substance P is blunted in dogs with atopic dermatitis.	Veterinary Dermatology. 12(3):149-54, 2001 Jun.	Journal Article Research Support, Non-U.S. Gov't	2001	English	10.1046/j.1365-3164.2001.00244.x	Skin reactivity to intradermal injections (0.1, 0.5 and 1 nM) of substance P (SP) was evaluated in 20 clinically normal dogs and 20 dogs with atopic dermatitis (AD). Saline and histamine were used as negative and positive controls, respectively. Wheal diameters were measured. Reactions were evaluated for erythema and induration and a subjective score, on a scale from 0 to 4+, was given. Evaluatio…	Y						Y						Y	Y						Y						Y	Y						Y							Y
162	Ovid MEDLINE(R)	Investigation of antinuclear antibodies in canine atopic dermatitis.	Journal of Veterinary Medicine - Series A. 48(4):193-8, 2001 May.	Journal Article	2001	English	10.1046 /j.1439-0442.2001.00346.x	Serum samples from 40 atopic dogs and 20 healthy dogs were assayed for antinuclear antibodies (ANA) using a human epithelial cell line (HEp-2) and standard indirect immunofluorescent methods. Samples from the atopic dogs were grouped according to the presence (n = 28) or absence (n = 12) of facial lesions at any moment during the follow-up period. Positive ANA titres were found in 10 of the 40 at…	Y						Y						Y	Y						Y						Y	N						Y							N
163	Ovid MEDLINE(R)	The use of compound 48/80 and codeine phosphate as positive controls for intradermal skin testing in dogs.	Veterinary Dermatology. 12(2):93-9, 2001 Apr.	Journal Article	2001	English	10.1046/j.1365-3164.2001.00232.x	The mast cell secretagogues compound 48/80 and codeine phosphate were evaluated as potential positive controls for intradermal skin testing in dogs. Wheal responses to both agents were compared with responses to histamine and saline in 11 normal dogs, and were strong and not significantly different from histamine responses in nine dogs (P < 0.01), and significantly weaker than histamine in two do…	Y						Y						Y	Y						Y						Y	N						N	X						N
164	Ovid MEDLINE(R)	Characterization of the inflammatory infiltrate during IgE-mediated late phase reactions in the skin of normal and atopic dogs.	Veterinary Dermatology. 12(1):49-58, 2001 Feb.	Journal Article Research Support, Non-U.S. Gov't	2001	English	10.1046 /j.1365-3164.2001.00230.x	In canine and human atopic patients, the intracutaneous injection of offending allergens is followed by the development of both immediate and late-phase reactions. The present study was performed to expand on the characterization and dynamics of inflammatory cell subsets during IgE-mediated late-phase reactions in canine skin. Three normal dogs and three Dermatophagoides farinae-allergic dogs wer…	Y						Y						Y	Y						Y						Y	N						Y							N
165	Ovid MEDLINE(R)	Clinicopathologic findings, sensitivity to house dust mites and efficacy of milbemycin oxime treatment of dogs with Cheyletiella sp. infestation.	Veterinary Dermatology. 12(1):13-8, 2001 Feb.	Journal Article	2001	English	Click here for full text options	Twenty-three dogs with positive skin scrapings for Cheyletiella sp. were treated with milbemycin oxime using a protocol approximating 2 mg kg-1 orally once weekly for three weeks. Nineteen of these dogs belonged to a household of 41 dogs and two dogs were in households with one other dog. All in-contact dogs were treated. Pre-treatment intradermal skin tests showed positive reactions to D. farina…	N	X					N	X					N							Y
166	Ovid MEDLINE(R)	Measurement of canine IgE using the alpha chain of the human high affinity IgE receptor.	Veterinary Immunology & Immunopathology. 78(3-4):349-55, 2001 Feb 10.	Evaluation Study Journal Article	2001	English	10.1016/s0165-2427(01)00242-2	In vitro assays for allergen specific immunoglobulin E (IgE) are a convenient and reproducible alternative to intradermal skin testing in dogs. Such tests may be used to support a diagnosis of atopic dermatitis and to define appropriate allergens for immunotherapy. Current in vitro assays rely upon monoclonal or polyclonal antibodies as IgE detection reagents. However, in sera where allergen-spec…	Y						Y						Y	Y						Y						Y	Y						N	X						N
167	Ovid MEDLINE(R)	Evaluation of the safety of an abbreviated course of injections of allergen extracts (rush immunotherapy) for the treatment of dogs with atopic dermatitis.	American Journal of Veterinary Research. 62(3):307-10, 2001 Mar.	Evaluation Study Journal Article	2001	English	Click here for full text options	OBJECTIVE: To evaluate the safety of an abbreviated course of injections of allergen extracts (rush immunotherapy) for the treatment of dogs with atopic dermatitis. ANIMALS: 30 dogs with atopic dermatitis examined at a veterinary dermatology referral practice for treatment with allergen-specific immunotherapy. PROCEDURE: A catheter was placed in a vein in each dog. Dogs were constantly observed t…	N	X					N	X					N							N	X
168	Ovid MEDLINE(R)	NAC Manchester Asthma and Allergy Study (NACMAAS): risk factors for asthma and allergic disorders in adults.	Clinical & Experimental Allergy. 31(3):391-9, 2001 Mar.	Journal Article	2001	English	Click here for full text options	Asthma and atopic disorders are the most common chronic diseases in the developed countries. Knowledge of the risk factors for these disorders may facilitate the development of preventive strategies aimed at reducing prevalence rates. To investigate the risk factors for asthma and allergic diseases in a large number of adults who are the parents of children in the National Asthma Campaign Manches…	N		X				N	X	X				N							N	X	X
169	Ovid MEDLINE(R)	Analysis of the canine IgE-binding epitope on the major allergen (Cry j 1) of Japanese cedar pollen with anti-Cry j 1 monoclonal antibodies.	Veterinary Immunology & Immunopathology. 78(1):35-43, 2001 Jan 10.	Journal Article Research Support, Non-U.S. Gov't	2001	English	10.1016/s0165-2427(00)00250-6	In our previous study [Immunology 91 (1997) 161] using monoclonal antibodies (mAbs) specific to Cry j 1, a major allergen in Japanese cedar (Cryptomeria japonica) pollen, we identified five independent epitopes (EP-1-EP-5) on the molecule and found that EP-1 and EP-5 are the predominant allergic epitopes for humans and monkeys, respectively. In this study, we analyzed the epitopes recognized by I…	Y						N	X					Y	Y						Y						Y	Y						Y							Y
170	Ovid MEDLINE(R)	Allergens causing atopic diseases in canine.	Journal of Veterinary Science. 3(4):335-41, 2002 Dec.	Journal Article	2002	English	Click here for full text options	Canine atopic skin disease is seasonal or sometimes non-seasonal immune-mediated skin disease which occurs commonly in Korea. The definite clinical sign is systemic pruritus, especially on periocular parts, external ear, interdigit spaces and lateral flank. For diagnosis of this dermatitis, complete history taking followed by intradermal skin test and serum in vitro IgE test needs to be performed…	Y						Y						Y	Y						Y						Y	N						N						X	N
171	Ovid MEDLINE(R)	Clinical course of cow's milk protein allergy/intolerance and atopic diseases in childhood.	Pediatric Allergy & Immunology. 13(s15):23-8, 2002.	Comparative Study Journal Article	2002	English	Click here for full text options	A cohort of 1,749 newborns from the municipality of Odense, born during 1995 at the Odense University Hospital, were followed up prospectively for the development of cow's milk protein allergy/intolerance (CMPA/I) during the first year of life. Once a diagnosis of CMPA/I was confirmed, a milk-free diet was continued until a new milk challenge had shown development of tolerance. All infants with C…	N		X				N	X	X				N							Y
172	Ovid MEDLINE(R)	Study defies the most basic tenets of homeopathy.	Canadian Veterinary Journal. 43(12):911-2, 2002 Dec.	Comment Letter	2002	English	Click here for full text options		N	X					N	X					N							N	X
173	Ovid MEDLINE(R)	Not classical homeopathy.	Canadian Veterinary Journal. 43(12):908-9; author reply 910-1, 2002 Dec.	Letter	2002	English	Click here for full text options		N	X					N	X					N							N	X
174	Ovid MEDLINE(R)	A retrospective study of hyposensitization in canine atopy based on a polyclonal ELISA test.	Veterinary Research Communications. 26(8):613-24, 2002 Dec.	Journal Article Research Support, Non-U.S. Gov't	2002	English	Click here for full text options	Compliance with the treatment protocol and the most significant reasons encountered in general practice for the discontinuation of treatment in hyposensitized dogs are examined. The data are based on (1) a review of order forms for the hyposenzitization mixture and information sheets for an ELISA test and (2) telephone interviews with dog owners. Most of the owners (81%) gave their dogs allergen …	Y						Y						Y	N	X					N	X					N
175	Ovid MEDLINE(R)	Exposure to pets and atopic dermatitis during the first two years of life. A cohort study.	Pediatric Allergy & Immunology. 13(6):394-401, 2002 Dec.	Comparative Study Journal Article Research Support, Non-U.S. Gov't	2002	English	Click here for full text options	The aim of this study was to assess the association between keeping pets in early childhood and the occurrence of atopic dermatitis in an ongoing birth cohort followed up to the age of 2 years. We analyzed data of 4578 children in the intervention and observation part of an ongoing cohort study. The children were recruited at birth in the two study regions Wesel and Munich between January 1996 an…	Y						N	X	X				Y	N	X	X				N		X				N
176	Ovid MEDLINE(R)	Incidence rates and risk factors for asthma among school children: a 2-year follow-up report from the obstructive lung disease in Northern Sweden (OLIN) studies.	Respiratory Medicine. 96(12):1006-13, 2002 Dec.	Journal Article Research Support, Non-U.S. Gov't Research Support, U.S. Gov't, P.H.S.	2002	English	Click here for full text options	Studies of incidence of asthma are still limited. A longitudinal study of asthma in school children was started in 1996 in Northern Sweden. The incidence of asthma and the associated risk factors have been studied over a 2 years period. The study started with a parental questionnaire, the ISAAC questionnaire with additional questions, and a skin-prick test. The cohort, 3,525 children, 7 and 8 yea…	N		X				N	X	X				N							Y
177	Ovid MEDLINE(R)	Exposure to pets and allergies in children.	Pediatric Allergy & Immunology. 13(5):334-41, 2002 Oct.	Comparative Study Journal Article Research Support, Non-U.S. Gov't	2002	English	Click here for full text options	Currently, there is ongoing discussion regarding potential protective effects of exposure to pets during early childhood on the development of atopic disorders in children later in life. We used data from three consecutive cross-sectional surveys to study the relationship between contact with dogs, cats and other pets, and allergic diseases in schoolchildren 5-14 years of age. In three study area…	N		X				N	X	X				N							N	X
178	Ovid MEDLINE(R)	[The contribution of food and airborne allergens in the pathogenesis of atopic dermatitis]. [Polish]	Przeglad Lekarski. 59(6):453-6, 2002.	English Abstract Journal Article	2002	Polish	Click here for full text options	Food hypersensitivity and airborne allergens may play a role in the pathogenesis of atopic dermatitis (AD). The aim of this study was to evaluate the kind of food and airborne allergens which may most often induce and intensify AD lesions and also to assess the variability and the kind of allergens leading to AD. The subjects of this study were 610 persons, aged 3 months-70 years. The clinical st…	N		X		X		N				X		N							Y
179	Ovid MEDLINE(R)	Evaluation of the usefulness of sensitization to aeroallergens as a model for canine atopic dermatitis in genetically predisposed Beagles.	American Journal of Veterinary Research. 63(9):1329-36, 2002 Sep.	Journal Article	2002	English	Click here for full text options	OBJECTIVE: To evaluate a model for atopic dermatitis (AD) and to measure the effect of sensitization in Beagles genetically predisposed to produce high serum concentrations of allergen specific IgE. ANIMALS: 22 laboratory Beagles. PROCEDURE: Seventeen dogs were sensitized from birth to 3 allergens (recombinant birch pollen, Dermatophagoides pteronyssinus, and D farinae). Five nonsensitized dogs f…	Y						N	X					Y	Y						N		X				N
180	Ovid MEDLINE(R)	Fatty acid composition of serum lipids in atopic and healthy dogs.	Research in Veterinary Science. 73(2):153-8, 2002 Oct.	Journal Article Research Support, Non-U.S. Gov't	2002	English	Click here for full text options	Fatty acids are increasingly used in the treatment of canine atopic dermatitis and their beneficial effects are documented in several prospective, controlled studies. Results from recent studies have indicated that atopic dogs have disordered fat metabolism, due to decreased desaturase activity. To further clarify these possible abnormalities, we examined serum fatty acid patterns in dogs with at…	Y						Y						Y	N	X					N	X					N
181	Ovid MEDLINE(R)	Investigation on the use of 0.3% tacrolimus lotion for canine atopic dermatitis: a pilot study.	Veterinary Dermatology. 13(4):203-10, 2002 Aug.	Clinical Trial Journal Article Randomized Controlled Trial	2002	English	Click here for full text options	The efficacy of 0.3% tacrolimus lotion (maximum dosage: 0.3 mg kg-1 per day) for treatment of atopic dermatitis (AD) was evaluated. Systemic absorption and effects on complete blood cell counts (CBC) and chemistry panels were also investigated. Eight dogs were assigned randomly to either a tacrolimus or a vehicle lotion treatment group. Both owners and investigator were blinded to the treatment. …	N	X					N	X					N							N	X
182	Ovid MEDLINE(R)	Treatment of canine atopic dermatitis with a commercial homeopathic remedy: a single-blinded, placebo-controlled study.	Canadian Veterinary Journal. 43(8):601-3, 2002 Aug.	Clinical Trial Controlled Clinical Trial Journal Article	2002	English	Click here for full text options	A commercial homeopathic remedy and a placebo were administered orally as individual agents to 18 dogs with atopic dermatitis. The pruritus was reduced by less than 50% in only 2/18 dogs; 1 of these dogs was receiving the homeopathic remedy, the other was receiving the placebo. One dog vomited after administration of the homeopathic remedy.	N	X					N	X					N							N	X
183	Ovid MEDLINE(R)	Randomized controlled trial of the efficacy of cyclosporine in the treatment of atopic dermatitis in dogs.	Journal of the American Veterinary Medical Association. 221(3):370-7, 2002 Aug 01.	Clinical Trial Journal Article Multicenter Study Randomized Controlled Trial Research Support, Non-U.S. Gov't	2002	English	Click here for full text options	OBJECTIVE: To evaluate efficacy of cyclosporine A, administered at either of 2 dosages, in dogs with atopic dermatitis (AD). DESIGN: Multicenter randomized controlled trial. ANIMALS: 91 dogs with AD. PROCEDURE: Dogs were assigned to receive placebo (30 dogs), cyclosporine at a low dosage (2.5 mg/kg [1.1 mg/lb], PO, q 24 h for 6 weeks; 30 dogs), or cyclosporine at a high dosage (5.0 mg/kg [2.3 mg/…	N	X					N	X					N							Y
184	Ovid MEDLINE(R)	The effects of capsaicin topical therapy in dogs with atopic dermatitis: a randomized, double-blinded, placebo-controlled, cross-over clinical trial.	Veterinary Dermatology. 13(3):131-9, 2002 Jun.	Clinical Trial Journal Article Randomized Controlled Trial Research Support, Non-U.S. Gov't	2002	English	Click here for full text options	The efficacy of twice daily topical application of capsaicin (0.025%) for the management of pruritus in dogs with atopic dermatitis (AD) was evaluated in double-blinded, placebo-controlled study. Twelve dogs with AD were randomly assigned to either 0.025% capsaicin or vehicle lotion applied twice daily for 6 weeks. After a 4-week wash-out period, treatments were switched. Significant improvement …	N	X					N	X					N							Y
185	Ovid MEDLINE(R)	Immune dysregulation in atopic dermatitis.	Veterinary Immunology & Immunopathology. 87(3-4):351-6, 2002 Sep 10.	Journal Article	2002	English	10.1016/s0165-2427(02)00066-1	Atopic dermatitis (AD) is a chronic inflammatory skin disease in humans and dogs with comparable clinical features. Comparative studies of immunological events in the pathogenesis of AD may contribute to understanding of the disease in dogs and to development and evaluation of immunomodulatory strategies of relevance to both species. Both allergen-specific as well as non-specific mechanisms contr…	Y						Y						Y	Y						Y						Y	Y						N			X				N
186	Ovid MEDLINE(R)	Evaluation of cross-reactivity of allergens by use of intradermal testing in atopic dogs.	American Journal of Veterinary Research. 63(6):874-9, 2002 Jun.	Journal Article	2002	English	10.2460/ajvr.2002.63.874	OBJECTIVE: To examine cross-reactivity of aeroallergens in Colorado and surrounding states by evaluating concurrent positive reactions of related and nonrelated allergens of intradermal tests in dogs. SAMPLE POPULATION: Intradermal test results of 268 atopic dogs. PROCEDURE: A retrospective evaluation of skin test results for 268 dogs was performed. Pairs of closely related and nonrelated allerge…	Y						Y						Y	Y						Y						Y	Y						Y							Y
187	Ovid MEDLINE(R)	Antihistamines in the management of canine atopic dermatitis: a retrospective study of 171 dogs (1992-1998).	Veterinary Therapeutics. 3(1):88-96, 2002 Spring.	Journal Article	2002	English	Click here for full text options	Antihistamines were prescribed for 178 of 271 dogs with a diagnosis of atopic dermatitis at the Veterinary Medical Teaching Hospital of the University of California, Davis from 1992 to 1998. Fifty-four percent of 166 dogs given antihistamines responded favorably to these treatments, with 27% of the responses rated as good and 27% rated as moderate. Diphenhydramine and hydroxyzine were the most co…	N	X					N	X					N							Y
188	Ovid MEDLINE(R)	Food sensitivity in the dog: a quantitative study.	Journal of Small Animal Practice. 43(5):203-7, 2002 May.	Journal Article Research Support, Non-U.S. Gov't	2002	English	Click here for full text options	Over a period of one year, 251 dogs were presented to a UK-based dermatology referral clinic. Eighty-five of these were either diagnosed as having symptoms compatible with atopy (58 dogs), or suffered from chronic otitis or recurrent pyoderma. All 85 were placed on a carefully restricted diet for eight to nine weeks in an attempt to establish whether the symptoms were due to food sensitivity. In …	N	X					N	X					N							N	X
189	Ovid MEDLINE(R)	Identification of Malassezia species from patient skin scales by PCR-RFLP.	Clinical Microbiology & Infection. 8(3):162-73, 2002 Mar.	Evaluation Study Journal Article Research Support, Non-U.S. Gov't	2002	English	Click here for full text options	OBJECTIVE: This study was aimed at the development of a DNA-based procedure directly applicable to pathological skin scales and at the assessment of its value in rapid laboratory confirmation and identification of each of the seven Malassezia species. These lipophilic basidiomycetous yeasts in predisposed individuals are involved in pityriasis versicolor, seborrheic dermatitis, blepharitis, folli…	N	X					N	X					N							N	X
190	Ovid MEDLINE(R)	Intradermal test reactivity to Malassezia pachydermatis in atopic dogs.	Veterinary Record. 150(14):448-9, 2002 Apr 06.	Journal Article Research Support, Non-U.S. Gov't	2002	English	10.1136/vr.150.14.448	SHORT COMMUNICATIONS_x000D_	Y						Y						Y	N	X		X			N						N
191	Ovid MEDLINE(R)	Canine atopic dermatitis: a retrospective study of 266 cases examined at the University of California, Davis, 1992-1998. Part I. Clinical features and allergy testing results.	Veterinary Dermatology. 13(2):89-102, 2002 Apr.	Journal Article	2002	English	Click here for full text options	The medical records of 266 dogs diagnosed as having atopic dermatitis were reviewed. Statistical data were evaluated referable to breed predilections, clinical signs and positive reactions to allergens. Positive reactions were most common to house dust mites (more common with clinical signs in the fall) followed by moulds (more common with clinical signs in the fall and spring). Dogs with positiv…	Y						Y						Y	Y						Y						Y	Y						Y							Y
192	Ovid MEDLINE(R)	Cyclosporine decreases skin lesions and pruritus in dogs with atopic dermatitis: a blinded randomized prednisolone-controlled trial.	Veterinary Dermatology. 13(2):77-87, 2002 Apr.	Clinical Trial Journal Article Multicenter Study Randomized Controlled Trial	2002	English	Click here for full text options	During the last decade, oral cyclosporin (CsA) has proven to be effective, in randomized controlled trials, for the treatment of atopic dermatitis (AD) in human patients. The purpose of this blinded randomized controlled trial was to test the hypothesis that CsA was successful in reducing the gravity of clinical signs of AD in dogs. Thirty dogs with nonseasonal AD were randomly allocated to recei…	N	X					N	X					N							N	X
193	Ovid MEDLINE(R)	Do levels of immunoglobulin G antibodies to foods predict the development of immunoglobulin E antibodies to cat, dog and/or mite?.	Clinical & Experimental Allergy. 32(4):556-62, 2002 Apr.	Journal Article Research Support, Non-U.S. Gov't	2002	English	Click here for full text options	BACKGROUND: In children at high risk of inhalation allergy, food sensitization is associated with an increased risk for sensitization to inhalant allergens. Furthermore, this association was also found in a cross-sectional study. OBJECTIVE: To examine in a prospective study, whether levels of IgG to foods (i.e. mixture of wheat and rice, mixture of soy bean and peanut, egg white, cow's milk, meat…	Y						Y						Y	N	X	X				N		X				N
194	Ovid MEDLINE(R)	Increase of allergen-specific immunoglobulin E antibodies from 1973 to 1994 in a Finnish population and a possible relationship to Helicobacter pylori infections.	Clinical & Experimental Allergy. 32(3):373-8, 2002 Mar.	Comparative Study Journal Article Research Support, Non-U.S. Gov't	2002	English	Click here for full text options	BACKGROUND: The prevalence of atopic diseases--hayfever, asthma and eczema--has increased over the past decades. The increase may be associated with decreased rates of infections such as measles, hepatitis A, tuberculosis, toxoplasmosis, and, as recently suggested, Helicobacter pylori gastritis. OBJECTIVE: Since the increase of atopy has been mainly based on clinical studies, we wanted to study t…	N		X				N	X	X				N							Y
195	Ovid MEDLINE(R)	Maternal history, sensitization to allergens, and current wheezing, rhinitis, and eczema among children in Costa Rica.	Pediatric Pulmonology. 33(4):237-43, 2002 Apr.	Clinical Trial Clinical Trial, Phase II Journal Article Multicenter Study Randomized Controlled Trial Research Support, Non-U.S. Gov't Research Support, U.S. Gov't, P.H.S.	2002	English	Click here for full text options	Little is known about the factors associated with asthma, allergic rhinitis, and eczema in Latin American countries. We investigated the relation between potential risk factors and current wheezing, allergic rhinitis, and eczema among 208 Costa Rican children aged 10-13 years participating in phase II of the International Study of Asthma and Allergies in Childhood (ISAAC). The geometric mean ( +/…	N		X				N	X	X				N							Y
196	Ovid MEDLINE(R)	Allergic sensitization owing to 'second-hand' cat exposure in schools.	Allergy. 57(4):357-61, 2002 Apr.	Comparative Study Journal Article Research Support, Non-U.S. Gov't	2002	English	Click here for full text options	BACKGROUND: Environmental allergen loads play an important role in triggering symptoms in atopic individuals. While a number of previous studies have shown that cat allergens (Fel d 1) can be found in school dust samples, no study has provided evidence that public places contribute to increased atopic sensitization rates in children. METHODS: We employed data collected in a health survey of schoo…	N		X				N	X	X				N							Y
197	Ovid MEDLINE(R)	Treatment of canine atopic dermatitis with zafirlukast, a leukotriene-receptor antagonist: a single-blinded, placebo-controlled study.	Canadian Veterinary Journal. 43(3):203-6, 2002 Mar.	Clinical Trial Controlled Clinical Trial Journal Article	2002	English	Click here for full text options	Zafirlukast and placebo were administered orally as individual agents to 20 dogs with atopic dermatitis. The pruritus was effectively reduced by at least 50% in 2/18 (11%) dogs that completed the trial with zafirlukast. Two dogs vomited after administration of the active drug.	N	X					N	X					N							N
198	Ovid MEDLINE(R)	Seasonal atopic dermatitis in dogs sensitive to a major allergen of Japanese cedar (Cryptomeria japonica) pollen.	Veterinary Dermatology. 13(1):53-59, 2002 Feb.	Case Reports Journal Article Research Support, Non-U.S. Gov't	2002	English	10.1046/j.0959-4493.2001.00277.x	Three dogs were examined because of episodes of recurrent pruritic dermatitis in the spring, the season of Japanese cedar (Cryptomeria japonica, CJ) pollination in Japan. The dogs were shown to be sensitive to CJ pollen allergen using intradermal testing and antigen-specific IgE measurement. Fluorometric enzyme-linked immunosorbant assay (ELISA) showed increased concentrations of IgE specific to …	Y						Y						Y	Y						Y						Y	N			X			N			X				N
199	Ovid MEDLINE(R)	Sensitivity patterns to house dust mites and forage mites in atopic dogs: 150 cases.	Veterinary Dermatology. 13(1):37-42, 2002 Feb.	Journal Article	2002	English	10.1046/j.0959-4493.2001.00270.x	This study investigated intradermal test reactions to extracts of six species of mites in 150 dogs with atopic dermatitis. At least one positive reaction was seen in 120 animals (80%). Dermatophagoides farinae attracted the highest number of positive reactions (108 dogs, 90% of dogs and 72% of atopic dogs showing positive reactions). Positive reactions to other mites were not uncommon, with many …	Y						Y						Y	Y						Y						Y	N						Y							N
200	Ovid MEDLINE(R)	Peripheral blood mononuclear cell responses to major and minor Dermatophagoides allergens in canine atopic dermatitis.	Veterinary Immunology & Immunopathology. 84(3-4):143-50, 2002 Jan 15.	Journal Article Research Support, Non-U.S. Gov't	2002	English	10.1016/s0165-2427(01)00405-6	Atopic dermatitis is a chronic inflammatory and pruritic skin disease commonly seen in dogs and humans. Most cases involve hypersensitivity to the house dust mites (HDM) Dermatophagoides farinae and Dermatophagoides pteronyssinus. Human atopic dermatitis is associated with the HDM derived allergens Der f 1 and 2, and Der p 1 and 2. Serological data, however, suggest that a 98/104kD protein is the…	Y						Y						Y	Y						Y						Y	N						Y							N
201	Ovid MEDLINE(R)	Childhood asthma and continuous exposure to cats since the first year of life with cats allowed in the child's bedroom.	Allergy. 58(10):1033-6, 2003 Oct.	Journal Article	2003	English	Click here for full text options	BACKGROUND: There are controversial data as to interdependencies of exposure to furred pets in infancy and the prevalence of asthma and hay fever in children. Does the timing, intensity and type of pet exposure matter? METHODS: Cross-sectional questionnaire data on 8216 German schoolchildren aged 5-7 years not living on a farm in ten rural districts in Bavaria in 1997 were analysed. The diagnosis…	N		X				N	X	X				N							Y
202	Ovid MEDLINE(R)	Effects of propofol-induced sedation on intradermal test reactions in dogs with atopic dermatitis.	Veterinary Dermatology. 14(3):167-76, 2003 Jun.	Clinical Trial Journal Article Randomized Controlled Trial	2003	English	Click here for full text options	We compared the effect of propofol and saline control on intradermal test reactions in dogs with atopic dermatitis undergoing outpatient intradermal testing (IDT). Nineteen dogs were used in this clinical study. Patients were randomly allocated to receive either intravenous (IV) propofol or IV 0.9% saline, and IDT was performed on the right or left (randomized) lateral thorax. One investigator, u…	Y						N	X					Y	Y						N	X					N
203	Ovid MEDLINE(R)	Comparison of intradermal and serum testing for allergen-specific IgE using a Fcepsilon RIalpha-based assay in atopic dogs in the UK.	Veterinary Immunology & Immunopathology. 93(1-2):51-60, 2003 May 30.	Clinical Trial Comparative Study Journal Article	2003	English	10.1016/s0165-2427(03)00052-7	Atopic dermatitis in dogs is a common allergic skin disease that affects substantial numbers of dogs in the UK. The purpose of this study was to compare the results of an intradermal test (IDT) and an in vitro test in a large cohort of dogs. Dogs were intradermal tested with Greer allergens (Greer Labs Inc, Lenoir, NC, USA) using standard techniques. At the same time blood samples were drawn and …	Y						Y						Y	Y						Y						Y	Y						Y							Y
204	Ovid MEDLINE(R)	Serum IgE and IgG responses to food antigens in normal and atopic dogs, and dogs with gastrointestinal disease.	Veterinary Immunology & Immunopathology. 92(3-4):113-24, 2003 May 12.	Journal Article	2003	English	Click here for full text options	In human food allergy, with or without concurrent atopy, there may be significant increases in serum allergen-specific IgE. Serological methods have been tried but are not currently recommended for diagnosis of suspected food allergy in dogs. The aim of this study was to investigate humoral immune responses to food antigens in dogs. Serum IgG and IgE antibodies specific for food antigens were mea…	Y						Y						Y	N	X					N	X					N
205	Ovid MEDLINE(R)	Different sensitization profile for asthma, rhinitis, and eczema among 7-8-year-old children: report from the Obstructive Lung Disease in Northern Sweden studies.	Pediatric Allergy & Immunology. 14(2):91-9, 2003 Apr.	Comparative Study Journal Article Research Support, Non-U.S. Gov't Research Support, U.S. Gov't, P.H.S.	2003	English	Click here for full text options	Sensitization to different airborne allergens in relation to asthma, rhinitis, and eczema has been studied. A cross-sectional study was performed among 7-8-year-old children living in northern Sweden. The ISAAC-questionnaire with additional questions were sent to the parents, and 3431 (97%) participated. Two-thirds of the children were invited to undergo a skin test with 10 common airborne allerg…	N		X				N	X	X				N							Y
206	Ovid MEDLINE(R)	Evaluation of serum obtained from atopic dogs with dermatitis attributable to Malassezia pachydermatis for passive transfer of immediate hypersensitivity to that organism.	American Journal of Veterinary Research. 64(3):262-6, 2003 Mar.	Clinical Trial Journal Article Research Support, Non-U.S. Gov't	2003	English	Click here for full text options	OBJECTIVE: To determine the functionality of canine anti-Malassezia IgE via the passive transfer of immediate hypersensitivity localized to the skin (ie, cutaneous anaphylaxis) from atopic dogs with dermatitis attributable to overgrowth of Malassezia pachydermatis (Malassezia dermatitis [MD]) to healthy recipient dogs by use of the Prausnitz-Kustner (P-K) technique. ANIMALS: 7 clinically normal d…	Y						Y						Y	N	X					Y						N
207	Ovid MEDLINE(R)	A randomized controlled trial of misoprostol monotherapy for canine atopic dermatitis: effects on dermal cellularity and cutaneous tumour necrosis factor-alpha.	Veterinary Dermatology. 14(1):37-46, 2003 Feb.	Clinical Trial Journal Article Randomized Controlled Trial Research Support, Non-U.S. Gov't	2003	English	Click here for full text options	In this blinded randomized placebo-controlled trial, 20 dogs with atopic dermatitis (AD) were given placebo (8 dogs) or misoprostol (12 dogs) at 5 micro g kg-1, orally, three times daily for 3 weeks. Administration of the active drug, but not of placebo, led to a significant decrease in lesional and pruritus scores. The median reduction from baseline of both scores was approximately 30%. Misopros…	N	X					N	X					N							Y
208	Ovid MEDLINE(R)	Comparison of cyclosporine A with methylprednisolone for treatment of canine atopic dermatitis: a parallel, blinded, randomized controlled trial.	Veterinary Dermatology. 14(1):11-22, 2003 Feb.	Clinical Trial Comparative Study Journal Article Randomized Controlled Trial Research Support, Non-U.S. Gov't	2003	English	Click here for full text options	The objective of this multicentre, parallel, blinded, randomized controlled study was to evaluate the efficacy and the safety of cyclosporine (CsA group, 117 dogs) in comparison with methylprednisolone (MP group, 59 dogs) in the treatment of atopic dermatitis for 4 months. Mean induction dose of both drugs (5 mg/kg CsA, 0.75 mg/kg MP) was tapered over time according to the clinical response. At t…	N	X					N	X					N							Y
209	Ovid MEDLINE(R)	Evaluation of a commercially available enzyme-linked immunosorbent assay for the detection of allergen-specific IgE antibodies in dogs.	Research in Veterinary Science. 74(1):37-45, 2003 Feb.	Evaluation Study Journal Article Research Support, Non-U.S. Gov't	2003	English	10.1016/s0034-5288(02)00151-0	Twenty-eight atopic dogs, 22 pruritic, non-atopic dogs and 10 healthy dogs were ELISA tested. For calculations of diagnostic specificity and sensitivity, positive ELISA test results in non-atopic dogs were considered false positive results. The absence of any positive results in the atopic dogs was considered false negative results. The atopic dogs were tested both with ELISA and an intradermal t…	Y						Y						Y	Y						Y						Y	Y						Y							Y
210	Ovid MEDLINE(R)	Canine atopic dermatitis: new targets, new therapies. [Review] [47 refs]	Journal of Nutrition. 134(8 Suppl):2056S-2061S, 2004 08.	Journal Article Review	2004	English	Click here for full text options	Atopic dermatitis is a common allergic skin disease of complex etiopathogenesis in both humans and dogs. Immediate-type hypersensitivity to environmental allergens that arises as a result of environmental and genetic factors is a major part of the pathogenesis in most but not all patients. Alterations in epidermal barrier function, priming of cutaneous antigen-presenting cells with IgE, intrinsic…	N			X			N	X		X			N							N	X
211	Ovid MEDLINE(R)	Asthma and allergic diseases in schoolchildren: third cross-sectional survey in the same primary school in Ankara, Turkey.	Pediatric Allergy & Immunology. 15(6):531-8, 2004 Dec.	Journal Article	2004	English	Click here for full text options	We investigated prevalence and determinants of asthma and allergic diseases in a cross-sectional survey of schoolchildren aged 6-14 in 2002. This was the third of a series of cross-sectional surveys, conducted in 1992 and 1997, in the same school in Ankara, Turkey. Questionnaire including information on house characteristics, dietary habits, past and current exposures and diseases were distribute…	N		X				N	X	X				N							N			X
212	Ovid MEDLINE(R)	Correlation among skin prick test, total and specific IgE UniCAP tests in atopic patients from Zagreb, Croatia.	Acta Dermatovenerologica Croatica. 12(4):257-60, 2004.	Comparative Study Journal Article	2004	English	Click here for full text options	The correlation of pollen allergens, Dermatophagoides pteronyssinus and animal dender was assessed during a two-year period. Results of skin prick test, total and specific IgE UniCAP tests were compared in atopic patients (AP) with the following diagnoses: atopic dermatitis, allergic rhinitis, allergic conjunctivitis, allergic bronchitis or asthma, allergic urticaria and angioedema. The study inc…	Y						N		X				Y	Y						N		X				N
213	Ovid MEDLINE(R)	Differential diagnosis of IgE-mediated allergy in young children with wheezing or eczema symptoms using a single blood test.	Annals of Allergy, Asthma, & Immunology. 93(4):328-33, 2004 Oct.	Evaluation Study Journal Article Research Support, Non-U.S. Gov't	2004	English	Click here for full text options	BACKGROUND: Allergy-like symptoms are common in young children, but the case history and physical examination cannot identify the underlying origins of overlapping symptom profiles. OBJECTIVE: To evaluate a blood test, Phadiatop Infant (Pharmacia Diagnostics AB, Uppsala, Sweden), for differentiating the capability of IgE-mediated disease in young children with recurrent wheezing, eczema, or both.…	N		X				N	X	X				N							N			X
214	Ovid MEDLINE(R)	Cheyletiella infestation in the dog: observations on diagnostic methods and clinical signs.	Journal of Small Animal Practice. 45(10):495-500, 2004 Oct.	Comparative Study Journal Article Research Support, Non-U.S. Gov't	2004	English	Click here for full text options	The aims of this study were to evaluate the ability of diagnostic methods to detect naturally occurring Cheyletiella infestation in dogs, and to quantify and relate the number of mites and eggs present to clinical signs. Privately owned dogs with skin problems were eligible for inclusion in the study. Four diagnostic tests were performed on each dog in the following order: tape impression, hair p…	N	X					N	X					N							Y
215	Ovid MEDLINE(R)	Diagnosis of flea allergy dermatitis: comparison of intradermal testing with flea allergens and a FcepsilonRI alpha-based IgE assay in response to flea control.	Veterinary Dermatology. 15(5):321-30, 2004 Oct.	Comparative Study Evaluation Study Journal Article Research Support, Non-U.S. Gov't	2004	English	10.1111/j.1365-3164.2004.00394.x	The objective of this study was to evaluate the accuracy of in vivo and in vitro tests in the diagnosis of flea allergy dermatitis in comparison with history, clinical signs and response to flea control. Intradermal testing using four different sources of flea allergens and FcepsilonRIalpha-based immunoglobulin (Ig)E assays were performed in 15 flea-allergic dogs, 15 atopic dogs and 15 dogs infes…	Y						N	X					Y	Y						Y						Y	N						N	X						N
216	Ovid MEDLINE(R)	Determination of threshold concentrations of allergens and evaluation of two different histamine concentrations in canine intradermal testing.	Veterinary Dermatology. 15(5):304-8, 2004 Oct.	Evaluation Study Journal Article Research Support, Non-U.S. Gov't	2004	English	10.1111 /j.1365-3164.2004.00400.x	The purpose of this study was to determine the optimal histamine concentration and allergen threshold concentrations for canine intradermal testing. Thirty healthy dogs were tested using two different concentrations of histamine and four different concentrations of each allergen. The optimal histamine concentration was determined to be 1:10 000 w/v. The threshold concentration was at least 1750 P…	Y						Y						Y	Y						Y						Y	Y						Y							Y
217	Ovid MEDLINE(R)	Investigation on the clinical efficacy and safety of 0.1% tacrolimus ointment (Protopic) in canine atopic dermatitis: a randomized, double-blinded, placebo-controlled, cross-over study.	Veterinary Dermatology. 15(5):294-303, 2004 Oct.	Clinical Trial Journal Article Randomized Controlled Trial Research Support, Non-U.S. Gov't	2004	English	Click here for full text options	Topical tacrolimus is successfully used in people with atopic dermatitis. Preliminary studies in dogs with atopic dermatitis using tacrolimus in a compounded lotion formulation indicated that tacrolimus significantly decreased erythema and pruritus according to investigator, but no significant improvement was reported by the dog owners. The objectives of this study were to evaluate the clinical e…	N	X					N	X					N							Y
218	Ovid MEDLINE(R)	Coughing in pre-school children in general practice: when are RAST's for inhalation allergy indicated?.	Pediatric Allergy & Immunology. 15(5):394-400, 2004 Oct.	Journal Article Research Support, Non-U.S. Gov't	2004	English	Click here for full text options	To identify patterns of clinical history associated with extreme (high or low) probabilities of allergic sensitization in coughing children so as to restrict allergy testing to those with an intermediate probability of sensitization. A total of 752 children, aged 1-4, visiting their GPs for coughing (>or=5 days), were tested for IgE-antibodies to house dust mite, cat and dog [RadioAllergoSorbent …	N		X				N	X	X				N							Y
219	Ovid MEDLINE(R)	[Are environmental controls effective for house-dust-mite allergies?]. [Spanish]	Archivos de Bronconeumologia. 40(9):389-91, 2004 Sep.	Editorial	2004	Spanish	Click here for full text options		N	X					N	X	X				N							Y
220	Ovid MEDLINE(R)	Effect of topical pimecrolimus on epicutaneous skin testing.	Journal of Allergy & Clinical Immunology. 114(3):695-7, 2004 Sep.	Clinical Trial Comparative Study Letter Randomized Controlled Trial	2004	English	Click here for full text options		N	X					N	X					N							N		X
221	Ovid MEDLINE(R)	Antibiotic responsive ulcerative dermatoses in German Shepherd Dogs with mucocutaneous pyoderma.	Australian Veterinary Journal. 82(8):485-9, 2004 Aug.	Case Reports Journal Article	2004	English	Click here for full text options	Mucocutaneous pyoderma is a disease of unknown aetiology affecting mucocutaneous skin and is responsive to antibacterial therapy. It is reported to affect the lips, nasal planum, nares, perioral skin and less commonly, the eyelids, vulva, prepuce and anus. Three cases of mucocutaneous pyoderma are presented. Two of the cases showed ulcerative lesions in the inguinal and axillary regions in additi…	N	X					N	X					N							Y
222	Ovid MEDLINE(R)	Investigation on the effects of topical therapy with 0.1% tacrolimus ointment (Protopic) on intradermal skin test reactivity in atopic dogs.	Veterinary Dermatology. 15(4):218-24, 2004 Aug.	Clinical Trial Journal Article Randomized Controlled Trial Research Support, Non-U.S. Gov't	2004	English	Click here for full text options	Tacrolimus ointment (TAC) is an effective treatment for atopic dermatitis in humans and dogs. The purposes of the present study were to evaluate the effect of 4 weeks of TAC on intradermal skin testing (IST), and in case of suppression, to investigate if reactivity returned to baseline by 2 or 4 weeks post treatment. Intradermal skin test was performed using saline, histamine, lipopolysaccharide …	N	X					N	X					N							N	X
223	Ovid MEDLINE(R)	What's eating you? Cheyletiella mites.	Cutis. 74(1):23-4, 2004 Jul.	Journal Article	2004	English	Click here for full text options		N	X					N	X					N							N		X
224	Ovid MEDLINE(R)	Estimation of heritability of atopic dermatitis in Labrador and Golden Retrievers.	American Journal of Veterinary Research. 65(7):1014-20, 2004 Jul.	Comparative Study Journal Article Research Support, Non-U.S. Gov't	2004	English	Click here for full text options	OBJECTIVE: To estimate the heritability of atopic dermatitis in Golden and Labrador Retrievers. ANIMALS: 429 dogs related to 13 dogs with atopic dermatitis. PROCEDURE: Atopic dermatitis was defined on the basis of the type and frequency of clinical signs recorded in the clinical records, and each dog was classified with atopic dermatitis or probable atopic dermatitis or as nonatopic. By use of da…	Y						N	X					Y	N	X					N	X					N
225	Ovid MEDLINE(R)	Cross reactivity of airborne allergens based on 1000 intradermal test results.	Australian Veterinary Journal. 82(6):351-4, 2004 Jun.	Evaluation Study Journal Article	2004	English	10.1111 /j.1751-0813.2004.tb11103.x	OBJECTIVE: The purpose of this study was to evaluate concurrent positive reactions of related versus nonrelated allergens based on 1000 intradermal tests of dogs with atopic dermatitis. PROCEDURE: Pairs of closely related allergens (based on botanical relations and results of research in human allergic disease) and nonrelated allergens were evaluated. Significance of the difference between group …	Y						Y						Y	Y						Y						Y	Y						Y							Y
226	Ovid MEDLINE(R)	A randomized, controlled study to evaluate the steroid sparing effect of essential fatty acid supplementation in the treatment of canine atopic dermatitis.	Veterinary Dermatology. 15(3):137-45, 2004 Jun.	Clinical Trial Journal Article Multicenter Study Randomized Controlled Trial Research Support, Non-U.S. Gov't	2004	English	Click here for full text options	A randomized, double blind, placebo-controlled multicentre clinical trial of 12 weeks' duration was undertaken in 60 dogs with atopic dermatitis to evaluate the steroid sparing effect of essential fatty acid supplementation. The dogs were randomly assigned to receive either a combination of borage seed oil and fish oil or a placebo, in addition to prednisolone tablets. All dogs received a standar…	N	X					N	X					N							Y
227	Ovid MEDLINE(R)	Treatment of canine atopic dermatitis with cetirizine, a second generation antihistamine: a single-blinded, placebo-controlled study.	Canadian Veterinary Journal. 45(5):414-7, 2004 May.	Journal Article	2004	English	Click here for full text options	Cetirizine and placebo were administered orally as individual agents to 23 dogs with atopic dermatitis. The pruritus was satisfactorily reduced in 4/22 (18%) dogs that completed the trial with cetirizine. Two dogs vomited after administration of the active drug.	N	X					N	X					N							Y
228	Ovid MEDLINE(R)	Effect of omega-3 fatty acids on canine atopic dermatitis.	Journal of Small Animal Practice. 45(6):293-7, 2004 Jun.	Clinical Trial Journal Article Randomized Controlled Trial Research Support, Non-U.S. Gov't	2004	English	Click here for full text options	Twenty-nine dogs were included in a double-blinded, placebo-controlled, randomised trial and were orally supplemented for 10 weeks with either flax oil (200 mg/kg/day), eicosapentaenoic acid (50 mg/kg/day) and docosahexaenoic acid (35 mg/kg/day) in a commercial preparation, or mineral oil as a placebo. For each dog, clinical scores were determined based on a scoring system developed prior to the …	N	X					N	X					N							N	X	X
229	Ovid MEDLINE(R)	Remission of the clinical signs of atopic dermatitis in dogs after cessation of treatment with cyclosporin A or methylprednisolone.	Veterinary Record. 154(22):681-4, 2004 May 29.	Clinical Trial Journal Article Randomized Controlled Trial	2004	English	Click here for full text options	Seventy-eight dogs with atopic dermatitis were treated for four months with either cyclosporin A or methylprednisolone. During the two months after the treatment ceased, 87 per cent of the dogs treated with methylprednisolone relapsed after a mean period of 27.9 days, whereas only 62 per cent of the dogs treated with cyclosporin A relapsed after a mean period of 40.7 days (P < .0.001). The clinic…	N	X					N	X					N							N	X
230	Ovid MEDLINE(R)	Staphylococcal enterotoxin-specific IgE antibodies in atopic dermatitis.	Pediatrics International. 46(3):337-41, 2004 Jun.	Journal Article	2004	English	Click here for full text options	BACKGROUND: The authors clarified the clinical significance of the measurement of serum concentrations of specific IgE antibodies to staphylococcal enterotoxin (SE) A- and SEB in atopic dermatitis (AD). METHODS: The serum concentrations of SEA- and SEB-specific IgE antibodies in 140 pediatric patients with AD were measured with an immuno CAP -radioallergosorbent test system (RAST). To check the c…	Y						Y						Y	N	X	X				N		X				N
231	Ovid MEDLINE(R)	Echinococcosis and allergy. [Review] [108 refs]	Clinical Reviews in Allergy & Immunology. 26(2):93-104, 2004 Apr.	Journal Article Review	2004	English	Click here for full text options	The larval stages of Echinococcus granulosus and E. multilocularis are involved in parasitic diseases in humans: cystic echinococcosis (CE) ("hydatid disease") and alveolar echinococcosis (AE), respectively. Both diseases and parasites have tight links with allergy because of the immunological characteristics that contribute to maintain the larvae in their human host as well as their potential in…	N			X			N	X		X			N							Y
232	Ovid MEDLINE(R)	The immunopathogenesis of flea allergy dermatitis in dogs, an experimental study.	Veterinary Immunology & Immunopathology. 99(3-4):179-92, 2004 Jun.	Journal Article Research Support, Non-U.S. Gov't	2004	English	Click here for full text options	In this study, we investigated the development of clinical disease and immune responses in the development of an experimental model of flea allergy dermatitis. Dogs were randomly divided into four treatment groups and were infested with fleas on two different feeding schedules (continuous and episodic). Group 1 consisted of four non-exposed dogs (negative controls) and Group 2 consisted of six do…	Y						N	X					Y	N	X					N	X					N
233	Ovid MEDLINE(R)	Clinical, histopathological and immunological effects of exposure of canine skin to Malassezia pachydermatis.	Medical Mycology. 42(2):165-75, 2004 Apr.	Journal Article	2004	English	Click here for full text options	The effects of the daily application for 7 days of suspensions of Malassezia pachydermatis to normal canine skin were evaluated in 10 beagle dogs. Four out of six dogs challenged without occlusion developed transient lesions generally characterized clinically by mild erythema with papules and histologically by mild epidermal hyperplasia and a superficial perivascular dermatitis. Saline-treated co…	N	X					Y						Y	Y						N	X					N
234	Ovid MEDLINE(R)	The clinical effect of environmental control of house dust mites in 60 house dust mite-sensitive dogs.	Veterinary Dermatology. 15(1):31-6, 2004 Feb.	Evaluation Study Journal Article	2004	English	Click here for full text options	The purpose of this study was to evaluate the effects of benzyl benzoate, an acaricide for the control of house dust mites, in 60 house dust mite-sensitive dogs. All dogs showed positive reactions on intradermal skin testing for house dust mites (Dermatophagoides farinae, Dermatophagoides pteronyssinus) alone, or house dust mites with storage mites (Acarus siro, Tyrophagus putrescentiae, Glycopha…	N	X					N	X					N							Y
235	Ovid MEDLINE(R)	Clinical, immunological and histopathological findings in a subpopulation of dogs with pododermatitis.	Veterinary Dermatology. 16(6):364-72, 2005 Dec.	Journal Article	2005	English	Click here for full text options	Clinical, immunological and histopathological findings in 20 adult dogs of varying breeds with chronic (>or=6 months) inflammation confined to the pedal skin were compared over a 2-year period with those of a group of age-matched controls (n=20). All affected dogs were pruritic but systemically well. Lesions were present on all four feet in 18/20 cases. Affected feet were characteristically eryth…	N	X					N	X					N							Y
236	Ovid MEDLINE(R)	The canine model of dietary hypersensitivity. [Review] [52 refs]	Proceedings of the Nutrition Society. 64(4):458-64, 2005 Nov.	Journal Article Review	2005	English	Click here for full text options	IgE-mediated dietary hypersensitivity affects approximately 1% of the canine population. There are no breed associations and < or =50% of the patients are aged <1 year at presentation. The most common causative allergens are beef, chicken, milk, eggs, maize, wheat and soyabean. Affected dogs generally display cutaneous disease and 10-15% of the patients may have concurrent alimentary involvement.…	N	X					N	X		X			N							Y
237	Ovid MEDLINE(R)	Cancer incidence in 13811 patients skin tested for allergy.	Journal of Investigational Allergology & Clinical Immunology. 15(3):161-6, 2005.	Comparative Study Journal Article Research Support, Non-U.S. Gov't	2005	English	Click here for full text options	AIM: Several studies have shown a negative correlation between cancer and atopy-related diseases. There are also a few reports of a positive relationship. We wanted to further evaluate these relationships in a prospective study. SUBJECTS AND METHODS: The incidence of malignant diseases among adult patients with atopy-related diseases (asthma, rhinitis, urticaria, eczema etc; n = 13811), who had b…	N	X					N	X	X				N							Y
238	Ovid MEDLINE(R)	Rush allergen specific immunotherapy protocol in feline atopic dermatitis: a pilot study of four cats.	Veterinary Dermatology. 16(5):324-9, 2005 Oct.	Clinical Trial Journal Article	2005	English	Click here for full text options	Rush immunotherapy has been shown to be as safe as conventional immunotherapy in canine atopic patients. Rush immunotherapy has not been reported in the feline atopic patient. The purpose of this pilot study was to determine a safe protocol for rush immunotherapy in feline atopic patients. Four atopic cats diagnosed by history, physical examination and exclusion of appropriate differential diagno…	N			X			N	X	X				N							Y
239	Ovid MEDLINE(R)	Atopy patch test reactions in high-IgE beagles to different sources and concentrations of house dust mites.	Veterinary Dermatology. 16(5):308-14, 2005 Oct.	Journal Article	2005	English	10.1111/j.1365-3164.2005.00472.x	Protocols for atopy patch testing (APT) were evaluated on six high-IgE dogs sensitized to house dust mites (HDM) using various concentrations and sources of HDM. Two sources of HDM were compared: Heska slurry and four concentrations of Greer HDM. Saline was used as a negative control. Patches were removed after 48 h and the sites evaluated at 0, 6, 24, 48, 72 and 96 h for erythema, macules, papul…	Y						N	X					Y	Y						Y						Y	N						N	X						N
240	Ovid MEDLINE(R)	Final report of the safety assessment of L-Ascorbic Acid, Calcium Ascorbate, Magnesium Ascorbate, Magnesium Ascorbyl Phosphate, Sodium Ascorbate, and Sodium Ascorbyl Phosphate as used in cosmetics. [Review] [260 refs]	International Journal of Toxicology. 24 Suppl 2:51-111, 2005.	Journal Article Review	2005	English	Click here for full text options	L-Ascorbic Acid, Calcium Ascorbate, Magnesium Ascorbate, Magnesium Ascorbyl Phosphate, Sodium Ascorbate, and Sodium Ascorbyl Phosphate function in cosmetic formulations primarily as antioxidants. Ascorbic Acid is commonly called Vitamin C. Ascorbic Acid is used as an antioxidant and pH adjuster in a large variety of cosmetic formulations, over 3/4 of which were hair dyes and colors at concentrati…	N	X	X				N	X		X			N							Y
241	Ovid MEDLINE(R)	Suggestions regarding a more appropriate understanding of atopic dermatitis. [Review] [41 refs]	Current Opinion in Allergy & Clinical Immunology. 5(5):413-8, 2005 Oct.	Journal Article Review	2005	English	Click here for full text options	PURPOSE OF REVIEW: The importance of consistency and accuracy of medical terminology must be recognized by all health care providers and researchers. Yet, recent publications by recognized authorities regarding atopic dermatitis seem to defy that basic tenet. I (an allergist/dermatologist) have (objectively) reviewed and (subjectively) interpreted the currently (peer reviewed) published designati…	N			X			N			X			N							Y
242	Ovid MEDLINE(R)	Bilateral ear canal neoplasia in three dogs.	Veterinary Dermatology. 16(4):276-80, 2005 Aug.	Case Reports Journal Article	2005	English	Click here for full text options	Bilateral ear canal infections are common in dogs. Ear canal neoplasia is usually associated with unilateral problems, and is uncommon in dogs. To the best of the author's knowledge, bilateral aural neoplasia has not been reported in dogs, and only four case reports were found in the human literature. This report presents three dogs that had bilateral tumours in their ear canals. They were presen…	N	X					N	X					N							N	X
243	Ovid MEDLINE(R)	Humoral measurement of type-1 hypersensitivity reactions to a commercial Malassezia allergen.	Veterinary Dermatology. 16(4):261-8, 2005 Aug.	Evaluation Study Journal Article	2005	English	10.1111/j.1365-3164.2005.00463.x	Malassezia pachydermatis is considered to be a contributing factor to canine atopic dermatitis (AD). The purpose of this study was to investigate the humoral response to a commercially produced M. pachydermatis extract. Fifteen atopic dogs with Malassezia overgrowth on the skin (MD), 16 atopic dogs without MD, three atopic dogs with overgrowth of Malassezia in the ears only (MO), and 12 normal do…	Y						Y						Y	Y						Y						Y	N						N	X						N
244	Ovid MEDLINE(R)	Reproducibility of a commercial in vitro allergen-specific assay for immunoglobulin E in dogs.	Veterinary Record. 157(3):81-5, 2005 Jul 16.	Evaluation Study Journal Article Research Support, Non-U.S. Gov't	2005	English	10.1136/vr.157.3.81	Samples of serum taken from 42 dogs with clinical signs and histories indicating pruritic skin disease and/or diseases of the ear were tested in a commercial allergen-specific assay for immunoglobulin E. Dogs which had been treated with glucocorticoids and/or antihistamines were not excluded. The samples were separated into two equal aliquots, given different randomised numbers, and analysed in t…	Y						N	X					Y	Y						Y						Y	Y						N	X						N
245	Ovid MEDLINE(R)	Papular dermatitis due to Leishmania spp. infection in dogs with parasite-specific cellular immune responses.	Veterinary Dermatology. 16(3):187-91, 2005 Jun.	Case Reports Journal Article	2005	English	Click here for full text options	Papular dermatitis due to Leishmania spp. infection was diagnosed in three boxers and two Rottweilers with Leishmania-specific cellular immunity. Diagnosis was based on histological and immunohistochemical examination of papules in four dogs and on cytological examination in one dog. Serum protein electrophoresis was within reference ranges and low antibody levels to Leishmania infantum were dete…	N	X					N	X					N							Y
246	Ovid MEDLINE(R)	Effectiveness of low dose immunotherapy in the treatment of canine atopic dermatitis: a prospective, double-blinded, clinical study.	Veterinary Dermatology. 16(3):162-70, 2005 Jun.	Clinical Trial Journal Article Randomized Controlled Trial Research Support, Non-U.S. Gov't	2005	English	Click here for full text options	There are anecdotal reports of increased effectiveness of allergen-specific immunotherapy (ASIT) in dogs with doses of vaccine lower than that recommended by the manufacturers. However, no controlled studies have been carried out. The aim of this prospective, double-blinded study was to evaluate whether induction and maintenance with low dose (LD) ASIT resulted in a different success rate compare…	N	X					N	X					N							N	X
247	Ovid MEDLINE(R)	Recurrent flank alopecia in a Tibetan Terrier.	Australian Veterinary Journal. 83(5):276-9, 2005 May.	Case Reports Journal Article	2005	English	Click here for full text options	Recurrent flank alopecia is described in a 2-year-old, male, neutered Tibetan Terrier with concurrent atopic dermatitis. The diagnosis of recurrent flank alopecia was made after 3 consecutive years of localised, winter-onset alopecia. The diagnosis was based on history, compatible clinical signs and supportive histopathology. The diagnosis was complicated by the presence of concurrent pruritic de…	N	X					N	X					N							Y
248	Ovid MEDLINE(R)	The implantation of a permanent transvenous endocardial pacemaker in 42 dogs: a retrospective study.	Medical Science Monitor. 11(6):BR168-175, 2005 Jun.	Journal Article	2005	English	Click here for full text options	BACKGROUND: The primary indication for pacemaker therapy in dogs and cats is symptomatic bradyarrhythmia that does not respond to medical treatment. Different techniques have been used for pacemaker implantation since 1968. Transvenous endocardial pacemaker implantation is a minimally invasive method and represents the first choice of treatment for this type of arrhythmia. MATERIAL/METHODS: The a…	N	X					N	X					N							N		X
249	Ovid MEDLINE(R)	Quantitative measurement of IgE antibodies to purified allergens using streptavidin linked to a high-capacity solid phase.	Journal of Allergy & Clinical Immunology. 115(5):1029-35, 2005 May.	Journal Article Research Support, N.I.H., Extramural Research Support, U.S. Gov't, P.H.S.	2005	English	Click here for full text options	BACKGROUND: Commercially available assays for IgE antibody provide results in international units per milliliter for many allergen extracts, but this is not easily achieved with purified or novel allergens. OBJECTIVE: To develop assays for IgE antibody suitable for purified or novel allergens by using a commercially available immunosorbent. METHODS: Streptavidin coupled to a high-capacity immunos…	Y						N	X					Y	Y						N		X				N
250	Ovid MEDLINE(R)	[Food hypersensitivity dermatitis in the dog: diagnostic possibilities]. [German]	Schweizer Archiv fur Tierheilkunde. 147(4):165-71, 2005 Apr.	English Abstract Journal Article	2005	German	Click here for full text options	Dogs with food hypersensitivity usually develop chronic pruritic dermatoses virtually indistinguishable from atopic dermatitis. These reactions are often called food allergy but the pathogenesis is poorly characterized. Several studies have addressed the incidence of canine adverse reactions to food but the outcomes were conflicting. The gold standard for the diagnosis of such a condition is the …	N	X					N	X		X			N							N	X
251	Ovid MEDLINE(R)	Evaluation of a point-of-care immunodot assay for predicting results of allergen-specific intradermal and immunoglobulin E serological tests.	Veterinary Dermatology. 16(2):117-20, 2005 Apr.	Evaluation Study Journal Article Research Support, Non-U.S. Gov't	2005	English	10.1111/j.1365-3164.2005.00442.x	Immunotherapy to prevent recurrence of clinical signs of atopic dermatitis (AD) is based on intradermal or serological tests that assist in identifying allergen-specific immunoglobulin E hypersensitivities. Unfortunately, the results of such tests can be negatively influenced by several factors, which include the age of the patients, the season of testing and the administration of anti-allergic d…	Y						Y						Y	Y						Y						Y	N						Y							N
252	Ovid MEDLINE(R)	Risk factors for atopic dermatitis in New Zealand children at 3.5 years of age.	British Journal of Dermatology. 152(4):742-9, 2005 Apr.	Journal Article Research Support, Non-U.S. Gov't	2005	English	Click here for full text options	BACKGROUND: The prevalence of atopic dermatitis (AD) is increasing in Western societies. The hygiene hypothesis proposes that this is due to reduced exposure to environmental allergens and infections during early life. OBJECTIVES: To examine factors associated with a diagnosis of AD at 3.5 years of age, especially those factors implicated by the hygiene hypothesis. METHODS: The Auckland Birthweig…	N		X				N		X				N							Y
253	Ovid MEDLINE(R)	Omalizumab: a recombinant humanized monoclonal IgE-blocking antibody. [Review] [19 refs]	Dermatology Online Journal. 11(1):2, 2005 Mar 01.	Journal Article Review	2005	English	Click here for full text options	Omalizumab (Xolair) is a recombinant humanized monoclonal antibody that blocks the high-affinity Fc receptor of immunoglobulin E (IgE). It is used to treat patients with moderate-persistent to severe-persistent asthma; patients must be older than 12 years, have a positive skin test to a perennial aeroallergen (e.g., dust mites, cats, dogs, and mold), and be symptomatic with inhaled corticosteroid…	N	X					N	X		X			N							Y
254	Ovid MEDLINE(R)	Allergen-specific sensitization in asthma and allergic diseases in children: the study on farmers' and non-farmers' children.	Clinical & Experimental Allergy. 35(2):160-6, 2005 Feb.	Journal Article	2005	English	Click here for full text options	BACKGROUND: Farmers' children are less frequently sensitized to common allergens than the non-farmers' children, but less is known about their sensitization to other allergens and its association with clinical diseases. OBJECTIVE: To examine the association of farm environment with atopic sensitization, allergic diseases, expression of allergen-induced symptoms, and the importance of specific sen…	N		X				N	X	X				N							Y
255	Ovid MEDLINE(R)	Treatment of localized lesions of canine atopic dermatitis with tacrolimus ointment: a blinded randomized controlled trial.	Veterinary Dermatology. 16(1):52-60, 2005 Feb.	Clinical Trial Journal Article Randomized Controlled Trial	2005	English	Click here for full text options	This investigator-blinded randomized controlled trial was designed to determine whether tacrolimus ointment (Protopic, Fujisawa Healthcare) decreased the severity of localized lesions of canine atopic dermatitis (AD). Twenty dogs with AD were enrolled if they exhibited lesions on both front metacarpi. Each foot was randomized to be treated with 0.1% tacrolimus or placebo (vaseline) ointment twice…	N	X					N	X					N							N	X
256	Ovid MEDLINE(R)	Intradermal testing with the storage mite Tyrophagus putrescentiae in normal dogs and dogs with atopic dermatitis in Colorado.	Veterinary Dermatology. 16(1):27-31, 2005 Feb.	Journal Article	2005	English	10.1111/j.1365-3164.2005.00415.x	The purpose of this study was to evaluate reactions to intradermal injections of Tyrophagus putrescentiae extract in healthy dogs and dogs with atopic dermatitis and to compare the prevalence of positive reactions in the two groups. Twenty-one healthy dogs and 26 atopic dogs were tested intradermally with T. putrescentiae extract at 1000, 500, 250, 125, 63, 32 and 16 PNU/mL. Reactions were evalua…	Y						Y						Y	Y						Y						Y	Y						Y							Y
257	Ovid MEDLINE(R)	[Prevention of atopic eczema. Evidence based guidelines]. [German]	Hautarzt. 56(3):232-40, 2005 Mar.	English Abstract Journal Article	2005	German	Click here for full text options	With an estimated prevalence of 12% for preschool children and 3% for adults, atopic eczema is a serious public health problem. This disease severely jeopardizes quality of life and is associated with considerable costs. Since there is still no causal therapy, primary and secondary prevention are especially important. Here the evidence basis for recommendations on prevention of atopic eczema is d…	N	X					N	X			X		N							Y
258	Ovid MEDLINE(R)	[Epidemiologic investigation of the pollen allergy to Cupressaceae in a population at risk for atopy]. [Italian]	Pediatria Medica e Chirurgica. 28(4-6):91-4, 2006.	English Abstract Journal Article Multicenter Study	2006	Italian	Click here for full text options	The so-called emerging allergens have gained particular interest as causes of atopic diseases, and among these the cypress pollen. In fact, several allergens derived from the Cupressaceae family have appeared for the first time in new environments, thus causing unexpected phenomena. From May 2002 to May 2003 we have examined 560 patients who sought medical attention at the Center for allergic dis…	N	X			X		N				X		N							Y
259	Ovid MEDLINE(R)	Recent developments in canine atopic dermatitis: a review. [Review] [23 refs]	Acta Veterinaria Hungarica. 54(4):473-84, 2006 Dec.	Journal Article Review	2006	English	Click here for full text options	Atopic dermatitis (AD) is a genetically predisposed inflammatory and pruritic allergic skin disease with characteristic clinical features. New results on the pathogenesis and therapeutic aspects are discussed in this review. IgE-mediated hypersensitivity may be involved in the largest subset of atopic patients, yet there is another subset for which such involvement cannot be documented. Alteratio…	N			X			N			X			N							N
260	Ovid MEDLINE(R)	Hymenoptera stings. [Review] [30 refs]	Clinical Techniques in Small Animal Practice. 21(4):194-204, 2006 Nov.	Journal Article Review	2006	English	Click here for full text options	The medically important groups of Hymenoptera are the Apoidea (bees), Vespoidea (wasps, hornets, and yellow jackets), and Formicidae (ants). These insects deliver their venom by stinging their victims. Bees lose their barbed stinger after stinging and die. Wasps, hornets, and yellow jackets can sting multiple times. Most deaths related to Hymenoptera stings are the result of immediate hypersensit…	N			X			N	X		X			N							N	X
261	Ovid MEDLINE(R)	Canine atopic dermatitis: validation of recorded diagnosis against practice records in 335 insured Swedish dogs.	Acta Veterinaria Scandinavica. 48:8, 2006 Jun 15.	Comparative Study Journal Article Research Support, Non-U.S. Gov't Validation Study	2006	English	Click here for full text options	A cross-sectional study of insured Swedish dogs with a recorded diagnosis of canine atopic dermatitis (CAD) was performed. In order to validate the correctness of this specific diagnosis in the insurance database, medical records were requested by mail from the attending veterinarians. All dogs with a reimbursed claim for the disease during 2002 were included in the original study sample (n = 373…	Y						Y						Y	N	X					Y						N
262	Ovid MEDLINE(R)	Objective measurement of pruritus in dogs: a preliminary study using activity monitors.	Veterinary Dermatology. 17(5):348-51, 2006 Oct.	Clinical Trial Journal Article	2006	English	Click here for full text options	Pruritus is an important clinical sign and quality-of-life measure in canine dermatology, but can be difficult to assess objectively. Several studies in humans have used activity monitors to measure nocturnal scratching in patients with atopic dermatitis. The results correlate with observation of scratching, scoring in atopic dermatitis indices and levels of inflammatory chemokines. The aim of th…	Y						Y						Y	N	X					N	X					N
263	Ovid MEDLINE(R)	Erythema multiforme possibly triggered by food substances in a dog.	Journal of Veterinary Medical Science. 68(8):869-71, 2006 Aug.	Case Reports Journal Article	2006	English	Click here for full text options	A 5-year-old female border collie presented with erythematous skin lesions at the axillae, groin, mucocutaneous junctions, and pinnae. Biopsy revealed lymphocytic interface dermatitis with hydropic degeneration of basal cells and keratinocyte apoptosis. Based on gross and histological features, diagnosis of erythema multiforme was made. The disease was resolved by treatment with azathioprine, pre…	N	X					N	X					N							N		X
264	Ovid MEDLINE(R)	Patch test responses to Malassezia pachydermatis in healthy basset hounds and in basset hounds with Malassezia dermatitis.	Medical Mycology. 44(5):419-27, 2006 Aug.	Journal Article	2006	English	Click here for full text options	The effects of the patch test application of Malassezia pachydermatis extracts were evaluated in seven healthy basset hounds and in seven basset hounds with Malassezia dermatitis. Antigens (4 and 0.4 mg/ml) and saline controls were applied for 48 h using filter paper discs in Finn chambers. One healthy basset hound and five affected hounds showed positive patch test reactivity to the yeast antige…	Y						Y						Y	Y						N	X					N
265	Ovid MEDLINE(R)	Management of canine atopic dermatitis using the plant extract PYM00217: a randomized, double-blind, placebo-controlled clinical study.	Veterinary Dermatology. 17(4):236-43, 2006 Aug.	Journal Article Randomized Controlled Trial Research Support, Non-U.S. Gov't	2006	English	Click here for full text options	This study evaluated PYM00217, a proprietary blend of plant extracts, in the management of canine atopic dermatitis (AD). One hundred and twenty dogs were diagnosed with perennial AD on the basis of history, clinical signs, a positive test for perennial allergens and elimination of other dermatoses. Exclusion criteria included antimicrobials within 7 days, antihistamines within 14 days, oral/topi…	N	X					N	X					N							N	X
266	Ovid MEDLINE(R)	Survey of the prevalence, diagnosis and treatment of dermatological conditions in small animals in general practice.	Veterinary Record. 158(16):533-9, 2006 Apr 22.	Journal Article	2006	English	Click here for full text options	A survey was made of the prevalence, diagnosis and treatment of dermatological conditions in small animals in general practice in the UK. Out of 3707 small animal consultations in general practice that were observed and recorded, 795 (21.4 per cent) involved animals that had a dermatological problem. In dogs and exotic species, pruritus was the most common presenting sign, accounting for 30 to 40…	Y						N	X					Y	N	X					N	X					N
267	Ovid MEDLINE(R)	Cockroach sensitisation in Belgian children.	European Journal of Pediatrics. 165(9):662-4, 2006 Sep.	Journal Article Research Support, Non-U.S. Gov't	2006	English	Click here for full text options		N		X				N	X	X				N							Y
268	Ovid MEDLINE(R)	Role of animal models in the study of drug-induced hypersensitivity reactions. [Review] [50 refs]	AAPS Journal. 7(4):E914-21, 2006 Jan 13.	Journal Article Research Support, Non-U.S. Gov't Review	2006	English	Click here for full text options	Drug-induced hypersensitivity reactions (DHRs) are a major problem, in large part because of their unpredictable nature. If we understood the mechanisms of these reactions better, they might be predictable. Their unpredictable nature also makes mechanistic studies very difficult, especially prospective clinical studies. Animal models are vital to most biomedical research, and they are almost the …	N			X			N	X		X			N							N	X
269	Ovid MEDLINE(R)	Food allergy in dogs and cats: a review. [Review] [101 refs]	Critical Reviews in Food Science & Nutrition. 46(3):259-73, 2006.	Journal Article Review	2006	English	Click here for full text options	Food allergy (FA) is defined as "all immune-mediated reactions following food intake," in contrast with food intolerance (FI), which is non-immune-mediated. Impairment of the mucosal barrier and loss of oral tolerance are risk factors for the development of FA. Type I, III, and IV hypersensitivity reactions are the most likely immunologic mechanisms. Food allergens are (glyco-)proteins with a mol…	N			X			N	X		X			N							N
270	Ovid MEDLINE(R)	Pilot investigation of a model for canine atopic dermatitis: environmental house dust mite challenge of high-IgE-producing beagles, mite hypersensitive dogs with atopic dermatitis and normal dogs.	Veterinary Dermatology. 17(1):24-35, 2006 Feb.	Journal Article Research Support, Non-U.S. Gov't	2006	English	Click here for full text options	Although canine atopic dermatitis (cAD) is common, few models are available. The aim of this study was to evaluate high-IgE beagles epicutaneously sensitized to house dust mite (HDM) as a possible model for cAD. Six high-IgE beagles were environmentally challenged with HDM using various doses and protocols. Similar challenge protocols were used in positive and negative control dogs: three dogs wi…	Y						Y						Y	Y						N	X					N
271	Ovid MEDLINE(R)	Food allergies: update of pathogenesis, diagnoses, and management. [Review] [38 refs]	Veterinary Clinics of North America - Small Animal Practice. 36(1):175-84, vii-viii, 2006 Jan.	Journal Article Review	2006	English	Click here for full text options		N	X					N	X		X			N							N	X
272	Ovid MEDLINE(R)	Generation of therapeutic antibody responses against IgE in dogs, an animal species with exceptionally high plasma IgE levels.	Vaccine. 24(1):66-74, 2006 Jan 09.	Journal Article	2006	English	Click here for full text options	Allergic diseases are common in dogs and the involvement of IgE in the pathogenesis of canine atopic dermatitis (CAD) and flea allergy dermatitis (FAD) is documented. However, many dogs do not achieve sufficient control of their allergic disease, and there is a great need for new treatment strategies. In order to address this issue we first needed to obtain a better picture of IgE-levels in dogs …	N	X					N	X					N							N	X
273	Ovid MEDLINE(R)	The efficacy of a commercial shampoo and whirlpooling in the treatment of canine pruritus - a double-blinded, randomized, placebo-controlled study.	Veterinary Dermatology. 18(6):427-31, 2007 Dec.	Journal Article Randomized Controlled Trial	2007	English	Click here for full text options	Twenty-two dogs with a history of at least 4 weeks pruritus were studied to determine the effect of whirlpool use on the efficacy of topical therapy with an antipruritic shampoo (Allermyl, Virbac; Bad Oldesloe, Germany). Dogs in group 1 received initially topical therapy with conventional shampooing (2 mL shampoo per kilogram bodyweight) once weekly for 4 weeks. Dogs in group 2 received the same …	N	X					N	X					N							N	X
274	Ovid MEDLINE(R)	Food for thought: pondering the relationship between canine atopic dermatitis and cutaneous adverse food reactions.	Veterinary Dermatology. 18(6):390-1, 2007 Dec.	Letter	2007	English	Click here for full text options		N	X					N	X					N							N			X
275	Ovid MEDLINE(R)	Malassezia spp. overgrowth in allergic cats.	Veterinary Dermatology. 18(5):316-23, 2007 Oct.	Journal Article	2007	English	Click here for full text options	A series of 18 allergic cats with multifocal Malassezia spp. overgrowth is reported: atopic dermatitis was diagnosed in 16, an adverse food reaction in another and one was euthanized 2 months after diagnosis of Malassezia overgrowth. All the cats were otherwise healthy and those tested (16 out of 18) for feline leukaemia or feline immunodeficiency virus infections were all negative. At dermatolog…	N		X				N	X	X				N							N	X
276	Ovid MEDLINE(R)	[Role of IgE-dependent reactions in atopic dermatitis]. [Polish]	Medycyna Wieku Rozwojowego. 11(2 Pt 1):135-8, 2007 Apr-Jun.	English Abstract Journal Article	2007	Polish	Click here for full text options	UNLABELLED: Atopic dermatitis is a disease of multifactorial pathogenesis. THE AIM: of the study was to establish the most common allergens responsible for development of atopic symptoms in children with atopic dermatitis. MATERIAL AND METHOD: the study complied 36 children aged 4 months - 3 years treated in the Department of Children Allergology, Gastroenterology and Nutrition because of atopic …	N						N				X		N							N	X
277	Ovid MEDLINE(R)	Animal models of complement-mediated hypersensitivity reactions to liposomes and other lipid-based nanoparticles. [Review] [37 refs]	Journal of Liposome Research. 17(2):107-17, 2007.	Comparative Study Journal Article Research Support, Non-U.S. Gov't Review	2007	English	Click here for full text options	Intravenous injection of some liposomal drugs, diagnostic agents, micelles and other lipid-based nanoparticles can cause acute hypersensitivity reactions (HSRs) in a high percentage (up to 45%) of patients, with hemodynamic, respiratory and cutaneous manifestations. The phenomenon can be explained with activation of the complement (C) system on the surface of lipid particles, leading to anaphylat…	N	X					N			X			N							N	X
278	Ovid MEDLINE(R)	Effects of otic betamethasone on intradermal testing in normal dogs.	Veterinary Dermatology. 18(4):205-10, 2007 Aug.	Journal Article Randomized Controlled Trial Research Support, Non-U.S. Gov't	2007	English	Click here for full text options	Otitis externa is common in atopic dogs and is frequently treated using potent glucocorticoids topically. These preparations can cause adrenal suppression and affect skin test reactivity. The purpose of this study was to determine if an otic product containing betamethasone could decrease skin reactivity in normal dogs. Sixteen laboratory beagles were used in a cross-over, blinded trial. Dogs wer…	N	X					N	X					N							N		X
279	Ovid MEDLINE(R)	Requirement for additional treatment for dogs with atopic dermatitis undergoing allergen-specific immunotherapy.	Veterinary Record. 160(25):861-4, 2007 Jun 23.	Journal Article Randomized Controlled Trial Research Support, Non-U.S. Gov't	2007	English	Click here for full text options	Allergen-specific immunotherapy (ASIT) is one of the main treatments for atopic dermatitis in dogs, but it often requires additional treatments such as antibacterial and antifungal therapy for secondary bacterial and yeast infections, or antipruritic drugs to control the clinical signs or treat the adverse effects of the immunotherapy. Twenty-seven dogs enrolled in a study of ASIT were clinically…	N	X					N	X					N							Y
280	Ovid MEDLINE(R)	Which aeroallergens are associated with eczema severity?.	Clinical & Experimental Dermatology. 32(4):401-4, 2007 Jul.	Journal Article	2007	English	Click here for full text options	We investigated if a correlation exists between aeroallergen sensitization and the severity of eczema. Data on aeroallergen response to skin-prick testing (SPT) and disease severity of children with eczema (n = 119) were evaluated. Atopy, as defined by at least one positive response to aeroallergen skin prick testing, was found in > 90% of eczema patients. House dust mite was the most commonly se…	Y						Y						Y	N	X	X				N		X				N
281	Ovid MEDLINE(R)	Investigation on the association between atopic dermatitis and the development of mycosis fungoides in dogs: a retrospective case-control study.	Veterinary Dermatology. 18(2):101-6, 2007 Apr.	Journal Article	2007	English	Click here for full text options	In human medicine, the relationship between the immunodysregulation observed in atopic dermatitis (AD) and the development of mycosis fungoides (MF) has triggered considerable interest due to the increasing number of patients with MF who have a previous history of AD. The purpose of this retrospective case-control study was to investigate whether dogs diagnosed with MF were more likely to have AD…	N	X					N	X					N
282	Ovid MEDLINE(R)	Intradermal injection of heat-killed Mycobacterium vaccae in dogs with atopic dermatitis: a multicentre pilot study.	Veterinary Dermatology. 18(2):87-93, 2007 Apr.	Journal Article Multicenter Study Randomized Controlled Trial	2007	English	Click here for full text options	Canine atopic dermatitis (cAD) is a common disease with a multifactorial aetiology associated with impaired immunoregulation. The immunopathogenesis has similarities to that of human atopic dermatitis. Clinical signs of allergic disease in humans and mice are reduced by administration of saprophytic mycobacteria that amplify regulatory cytokines and hence the effect of Mycobacterium vaccae on the…	Y						Y						Y	N	X					N	X					N
283	Ovid MEDLINE(R)	Occupational contact urticaria and rhinoconjunctivitis from dog's milk in a veterinarian.	Contact Dermatitis. 56(3):169-71, 2007 Mar.	Case Reports Journal Article	2007	English	Click here for full text options	We report the case of a 46-year-old veterinarian who developed rhinoconjunctivitis and contact urticaria (CU) on his hands and forearms after contact with dog's milk. Prick tests results revealed a positive reactions to Parietaria pollens, Dermatophagoides farinae and D.pteronyssinus, dander of cat, grass, olive (+++), and to undiluted dog's milk (++++). Control prick tests with dog's milk perfor…	N	X					N	X					N
284	Ovid MEDLINE(R)	Advances in upper airway diseases and allergen immunotherapy. [Review] [49 refs]	Journal of Allergy & Clinical Immunology. 119(4):872-80, 2007 Apr.	Journal Article Review	2007	English	Click here for full text options	The purpose of this review is to highlight important articles on upper airway diseases and immunotherapy that appeared during 2006. Studies from Europe continue to examine the usefulness of the Allergic Rhinitis and its Impact on Asthma classification of allergic rhinitis as intermittent or persistent and its levels of severity as mild or moderate/severe. A number of physical agents were shown to…	N	X					N	X		X			N
285	Ovid MEDLINE(R)	Outcomes from homeopathic prescribing in veterinary practice: a prospective, research-targeted, pilot study.	Homeopathy: the Journal of the Faculty of Homeopathy. 96(1):27-34, 2007 Jan.	Journal Article	2007	English	Click here for full text options	BACKGROUND AND AIMS: Targeted research development in veterinary homeopathy is properly informed by the systematic collection and analysis of relevant clinical data obtained by its practitioners. We organised a pilot data collection study, in which 8 Faculty of Homeopathy veterinarians collected practice-based clinical and outcomes data over a 6-month period. METHODS: A specifically designed Exce…	N	X					N	X					N
286	Ovid MEDLINE(R)	Contact dermatitis to a canine anti-dandruff shampoo.	Australasian Journal of Dermatology. 48(1):62-3, 2007 Feb.	Case Reports Journal Article	2007	English	Click here for full text options	A 40-year-old teacher presented after her third episode of acute facial oedema within 4 months. Each episode occurred 1-2 days after visiting her mother's house. Patch testing showed positive reactions to miconazole and econazole nitrate. The patient denied use of any antifungal creams, but it transpired that her mother's dog was being shampooed weekly with an antifungal shampoo containing micona…	N	X					N	X					N
287	Ovid MEDLINE(R)	Cutaneous and ocular adverse reactions in a dog following meloxicam administration.	Veterinary Dermatology. 18(1):45-9, 2007 Feb.	Case Reports Journal Article	2007	English	Click here for full text options	The present report addresses the development of cutaneous and ocular reactions possibly related to meloxicam administration in a dog. Based on clinical signs and absence of laboratory data compatible with the other differential diagnoses considered, the possibility of an adverse drug reaction (ADR) due to meloxicam was considered. Skin biopsy revealed haemorrhage of the superficial and deep dermi…	N	X					N	X					N
288	Ovid MEDLINE(R)	Clinical efficacy of neural therapy for the treatment of atopic dermatitis in dogs.	Acta Veterinaria Hungarica. 56(4):459-69, 2008 Dec.	Clinical Trial Journal Article	2008	English	Click here for full text options	The aim of this trial was to assess the clinical efficacy of neural therapy (NT) when treating canine atopic dermatitis. Eighteen dogs (no control group), with at least a 12-month history of having nonseasonal atopic dermatitis, were included. No medication with either glucocorticoids or cyclosporin was allowed during the trial. One set of NT was given by injecting an intravenous dose of 0.1 mg/k…	N	X					N	X					N
289	Ovid MEDLINE(R)	Dermatophagoides farinae-specific IgG responses in atopic dogs undergoing allergen-specific immunotherapy with aqueous vaccines.	Veterinary Dermatology. 19(4):215-20, 2008 Aug.	Clinical Trial Journal Article	2008	English	Click here for full text options	The molecular and immunologic mechanisms associated with successful allergen-specific immunotherapy (ASIT) have not been completely elucidated. The aim of this study was to characterize the changes in Dermatophagoides farinae-specific IgG in atopic dogs undergoing ASIT using aqueous vaccines. Fifteen atopic dogs with a positive skin test reaction to D. farinae were treated with aqueous vaccines f…	N	X					Y						Y	Y						N	X					N
290	Ovid MEDLINE(R)	Multifocal papular deep bacterial pyoderma in a Boxer dog caused by Pseudomonas aeruginosa.	Australian Veterinary Journal. 86(11):435-9, 2008 Nov.	Case Reports Journal Article	2008	English	Click here for full text options	A young adult Boxer dog was presented with a papular dermatitis on the dorsal back and ventral neck that had developed while it was being treated with cyclosporine and cephalexin for atopic dermatitis and secondary superficial staphylococcal pyoderma, respectively. Histopathology demonstrated nodular to diffuse pyogranulomatous dermatitis with focal furunculosis. Numerous bacterial rods, free in …	N	X					N	X					N
291	Ovid MEDLINE(R)	Patterns of food and aeroallergen sensitization in childhood eczema.	Acta Paediatrica. 97(12):1734-7, 2008 Dec.	Comparative Study Journal Article	2008	English	Click here for full text options	AIM: To compare the patterns of Type 1 sensitization of common food and aeroallergens among infants and older patients with atopic dermatitis (AD). METHODS: All skin prick tests (SPTs) performed over a 6-month period were examined, and patients with urticaria were used for comparison. RESULTS: Dust mite was the most common aeroallergen and dog dander the least common. Egg white was the most commo…	N		X				N	X	X				N
292	Ovid MEDLINE(R)	The prevalence of positive intradermal allergy tests in 114 dogs with atopic dermatitis in the Bangkok metropolis, Thailand.	Veterinary Immunology & Immunopathology. 126(3-4):256-62, 2008 Dec 15.	Comparative Study Journal Article	2008	English	10.1016/j.vetimm.2008.07.010	Intradermal allergy tests using 47 selected local aero-allergens were performed on 114 dogs with atopic dermatitis. The subject animals visited the Dermatology Unit at the Veterinary Teaching Hospital of Kasetsart University or the SLV Pet Hospital with chronic pruritus and various skin lesions. Allergen extracts were composed of: 4 house dust and house dust mites, 7 household insects, 24 pollens…	Y						Y						Y	Y						Y						Y	Y						Y							Y
293	Ovid MEDLINE(R)	The efficacy of commercially available veterinary diets recommended for dogs with atopic dermatitis.	Veterinary Dermatology. 19(5):280-7, 2008 Oct.	Journal Article Multicenter Study Randomized Controlled Trial Research Support, Non-U.S. Gov't	2008	English	Click here for full text options	The classical treatments for dogs with atopic dermatitis have traditionally been oral antipruritic drugs, allergen-specific immunotherapy and topical therapy. Fifty dogs with atopic dermatitis were included in this multicentred, double-blinded, randomized study to compare clinical response to an 8-week period of feeding one of three commercial veterinary foods marketed for dogs with atopic dermat…	N	X					N	X					N
294	Ovid MEDLINE(R)	Contact and aeroallergens in adulthood atopic dermatitis.	Journal of the European Academy of Dermatology & Venereology. 22(11):1346-55, 2008 Nov.	Journal Article	2008	English	Click here for full text options	BACKGROUND: Atopic dermatitis (AD) is a clinically well-defined, chronic-intermittant, genetically predisposed skin disease. The increasing number of adult cases observed in the last years has turned the attention to ascertaining factors eliciting skin symptoms. Studies have revealed numerous environmental components (e.g. contact and aeroallergens) that may play an important role in sustaining t…	N		X				N	X	X				N
295	Ovid MEDLINE(R)	Importance of house dust and storage mites in canine atopic dermatitis in the geographic region of Galicia, Spain.	Acta Veterinaria Hungarica. 56(2):163-71, 2008 Jun.	Journal Article	2008	English	10.1556/AVet.56.2008.2.3	Sensitisation to mites is frequent in atopic dogs. The main mite genus involved in canine atopic dermatitis is Dermatophagoides. The importance of storage mite allergens in dogs has been controversial. The aim of this study was to evaluate the sensitisation rates against storage mites (Lepidoglyphus destructor and Tyrophagus putrescentiae) and house dust mites (Dermatophagoides farinae and D. pte…	Y						Y						Y	Y						Y						Y	Y						Y							Y
296	Ovid MEDLINE(R)	Evaluation of storage mite contamination of commercial dry dog food.	Veterinary Dermatology. 19(4):209-14, 2008 Aug.	Journal Article Research Support, Non-U.S. Gov't	2008	English	Click here for full text options	Storage mites may be considered important allergens in dogs with atopic dermatitis. High sensitization rates to Tyrophagus, Acarus, and Lepidoglyphus species have been reported in atopic dogs, and dry pet food has been suggested as a potential source of storage mite exposure. The aim of the present study was to evaluate commercial dry dog food for contamination with storage mites, and how storage…	N	X					N	X					N
297	Ovid MEDLINE(R)	Efficacy of an essential fatty acid-enriched diet in managing canine atopic dermatitis: a randomized, single-blinded, cross-over study.	Veterinary Dermatology. 19(3):156-62, 2008 Jun.	Journal Article Randomized Controlled Trial Research Support, Non-U.S. Gov't	2008	English	Click here for full text options	Evidence suggests that high-quality diets enriched with essential fatty acids (EFA) and other nutrients can ameliorate canine atopic dermatitis (AD). This study compared such a diet (Eukanuba Veterinary Diets Dermatosis FP) with a home-cooked equivalent (fish and potato) in a randomised, single-blinded, cross-over trial. Twenty dogs with perennial AD were randomly assigned to receive either the t…	N	X					N	X					N
298	Ovid MEDLINE(R)	Determination of CADESI-03 thresholds for increasing severity levels of canine atopic dermatitis.	Veterinary Dermatology. 19(3):115-9, 2008 Jun.	Journal Article	2008	English	10.1111/j.1365-3164.2008.00668.x	To evaluate the extent and severity of skin lesions in clinical trials enrolling dogs with atopic dermatitis (AD), the International Task Force on Canine Atopic Dermatitis recently recommended the use of the third version of the CADESI. This version of the CADESI was found to exhibit acceptable content, construct, criterion, inter- and intraobserver reliability and sensitivity to change. The curr…	Y						Y						Y	Y						Y						Y	N						N	X						N
299	Ovid MEDLINE(R)	Comparison between an intradermal skin test and allergen-specific IgE-ELISA for canine atopic dermatitis.	Schweizer Archiv fur Tierheilkunde. 150(3):117-22, 2008 Mar.	Journal Article	2008	English	Click here for full text options	The aim of this study was to compare the results of an intradermal skin test (IDST) with those of an allergen-specific IgE-ELISA in 210 dogs with atopic dermatitis. All the dogs had a clinical diagnosis of atopic dermatitis and underwent an IDST. The sera of all dogs were analysed for allergen-specific IgE by ELISA using the monoclonal antibody D9 against dog IgE. IDST was used as the standard as…	Y						Y						Y	Y						Y						Y	N						N						X	N
300	Ovid MEDLINE(R)	Assessment of cross-reactivity among five species of house dust and storage mites.	Veterinary Dermatology. 19(2):67-76, 2008 Apr.	Journal Article	2008	English	Click here for full text options	In vitro cross-reactivity among two house dust (Dermatophagoides farinae, D. pteronyssinus) and three storage (Acarus siro, Tyrophagus putrescentiae, Lepidoglyphus destructor) mites was examined in 20 mite-sensitive dogs with natural occurring atopic dermatitis (group A), 13 high-IgE beagles experimentally sensitized to D. farinae (group B), and five healthy beagles (group C). Intradermal testing…	Y						Y						Y	Y						N	X					N
301	Ovid MEDLINE(R)	Epicutaneous aeroallergen sensitization in atopic dermatitis infants - determining the role of epidermal barrier impairment.	Allergy. 63(2):205-10, 2008 Feb.	Journal Article Research Support, Non-U.S. Gov't	2008	English	Click here for full text options	BACKGROUND: Sensitization to atopens is an early phenomenon that overlaps with the onset of atopic dermatitis (AD) in infancy. Early epidermal barrier impairment may facilitate the epicutaneous penetration of atopens. OBJECTIVE: To correlate transepidermal water loss (TEWL) and aeroallergen sensitization in infants with AD. METHODS: In this cross-sectional study we enrolled 59 AD children and 30 …	N		X				N		X				N
302	Ovid MEDLINE(R)	Lack of detection of circulating skin-specific IgE autoantibodies in dogs with moderate or severe atopic dermatitis.	Veterinary Immunology & Immunopathology. 122(1-2):182-7, 2008 Mar 15.	Journal Article	2008	English	10.1016/j.vetimm.2007.11.003	Human patients with atopic dermatitis (AD) commonly exhibit IgE reactivity to cutaneous self-antigens. The presence of serum IgE autoantibodies appears to correlate with disease severity, and it is suspected to reflect or contribute to tissue damage. The objective of this study was to determine whether IgE autoantibodies specific for cutaneous antigens could be detected in the serum of dogs with …	Y						Y						Y	Y						Y						Y	N						Y							N
303	Ovid MEDLINE(R)	Use of the D-dimer assay for diagnosing thrombosis in cases of canine cutaneous vasculitis.	Veterinary Dermatology. 20(5-6):586-90, 2009 Oct.	Journal Article Research Support, Non-U.S. Gov't	2009	English	Click here for full text options	The objectives of this study were to measure D-dimer concentrations and assess their value in diagnosis of thrombosis in three groups of dogs; (i) dogs with cutaneous vasculitis without histopathological evidence of thrombosis; (ii) dogs with cutaneous vasculitis with histopathological evidence of thrombosis; and (iii) pruritic dogs with erythematous skin and underlying allergic skin disease. D-d…	N	X					N	X					N
304	Ovid MEDLINE(R)	Immunohistochemical evaluation of filaggrin polyclonal antibody in atopic and normal beagles.	Veterinary Dermatology. 20(5-6):547-54, 2009 Oct.	Journal Article Research Support, Non-U.S. Gov't	2009	English	Click here for full text options	In human atopic dermatitis (AD), impairments in skin barrier function are emphasized and hypothesized to increase risk of allergic sensitization. Filaggrins, crucial proteins for keratinization, are decreased in lesional and nonlesional human atopic skin. As canine AD shares numerous similarities with the human counterpart, this study aimed to evaluate a polyclonal antibody against human filaggri…	Y						N	X					Y	N	X					N	X					N
305	Ovid MEDLINE(R)	The use of recombinant omega interferon therapy in canine atopic dermatitis: a double-blind controlled study.	Veterinary Dermatology. 20(5-6):405-11, 2009 Oct.	Journal Article Randomized Controlled Trial Research Support, Non-U.S. Gov't	2009	English	Click here for full text options	This double-blind controlled study assessed whether reduced doses of omega interferon (rFeIFN-omega) (Virbagen Omega) could improve the clinical signs of canine atopic dermatitis (CAD) over a 6-month period, in comparison with cyclosporin. Thirty-one dogs diagnosed with CAD were entered in the study. Complicating infections were treated prior to entry. Dogs received 10 injections of rFeIFN-omega …	N	X					N	X					N
306	Ovid MEDLINE(R)	Development of an enzyme-linked immunosorbent assay for detection of circulating IgG autoantibodies against canine desmoglein 3 in dogs with pemphigus.	Veterinary Dermatology. 20(5-6):331-7, 2009 Oct.	Journal Article Research Support, Non-U.S. Gov't	2009	English	Click here for full text options	Pemphigus, a group of autoimmune blistering dermatoses recognized in humans and dogs, is divided into three subgroups: pemphigus vulgaris (PV), pemphigus foliaceus (PF) and paraneoplastic pemphigus (PNP). Previously, we have demonstrated that circulating anti-desmoglein 3 (Dsg3) IgG in dogs with PV and PNP disrupts Dsg3-mediated keratinocyte cell-cell adhesion. The aim of this study was to develo…	N	X					N	X					N
307	Ovid MEDLINE(R)	Toxocariasis resulting in seeming allergy.	Iranian Journal of Allergy Asthma & Immunology. 8(3):161-4, 2009 Sep.	Case Reports Journal Article	2009	English	Click here for full text options	Toxocara canis is an intestinal nematode affecting dogs and cats that causes human infestations by ingestion of embryonated eggs excreted in dogs' faeces. Humans are transport hosts, in whom the larvae do not develop to adult worms, but may migrate to various tissues and organs, and survive for several years, giving rise to several clinical symptoms, which include allergy-like presentations. We r…	N	X					N	X					N
308	Ovid MEDLINE(R)	GA(2)LEN skin test study I: GA(2)LEN harmonization of skin prick testing: novel sensitization patterns for inhalant allergens in Europe.	Allergy. 64(10):1498-1506, 2009 Oct.	Journal Article Research Support, Non-U.S. Gov't	2009	English	Click here for full text options	BACKGROUND: Skin prick testing is the standard for diagnosing IgE-mediated allergies. However, different allergen extracts and different testing procedures have been applied by European allergy centres. Thus, it has been difficult to compare results from different centres or studies across Europe. It was, therefore, crucial to standardize and harmonize procedures in allergy diagnosis and treatmen…	Y						N	X					Y	N	X					N		X				N
309	Ovid MEDLINE(R)	Risk factors and prevalence of asthma in schoolchildren in Castellon (Spain): a cross-sectional study.	Allergologia et Immunopathologia. 37(3):135-42, 2009 May-Jun.	Journal Article Research Support, Non-U.S. Gov't	2009	English	Click here for full text options	BACKGROUND: Research on potential risk factors of asthma can enhance our understanding of geographic differences and inform decisions on preventive strategies. METHODS: In 2002, a cross-sectional population-based study was carried out in the area of Castellon (Spain), following the International Study of Asthma and Allergies in Childhood (ISAAC) Phase III methodology. Asthma symptoms and related …	N		X				N	X	X				N
310	Ovid MEDLINE(R)	Comparison of the cardiac electrophysiology and general toxicology of two formulations of intravenous amiodarone in dogs.	Cardiovascular Toxicology. 9(3):126-33, 2009 Sep.	Comparative Study Journal Article	2009	English	Click here for full text options	Intravenous amiodarone (AIV) must be administered slowly after dilution to avoid hypotension, which is due to the cosolvents polysorbate 80 and benzyl alcohol used in its formulation. PM101 is a formulation of amiodarone devoid of these cosolvents, which enables bolus administration. We evaluated any potential toxicity or exaggerated adverse cardiac electrophysiologic effects of PM101 compared wi…	N	X					N	X					N
311	Ovid MEDLINE(R)	Tepoxalin reduces pruritus and modified CADESI-01 scores in dogs with atopic dermatitis: a prospective, randomized, double-blinded, placebo-controlled, cross-over study.	Veterinary Dermatology. 20(4):233-42, 2009 Aug.	Journal Article Randomized Controlled Trial Research Support, Non-U.S. Gov't	2009	English	Click here for full text options	Thirty dogs with atopic dermatitis were given tepoxalin (Zubrin, Intervet/Schering-Plough Animal Health, Boxmeer, the Netherlands) or placebo once daily for 4 weeks, followed by a wash-out period of 1 week before reversing the treatments. Pruritus was scored by the owners using the Edinburgh Pruritus Scale and one investigator employed a modification of the Canine Atopic Dermatitis Extent and Sev…	N	X					N	X					N
312	Ovid MEDLINE(R)	Risk analysis of early childhood eczema.	Journal of Allergy & Clinical Immunology. 123(6):1355-60.e5, 2009 Jun.	Journal Article Research Support, Non-U.S. Gov't	2009	English	Click here for full text options	BACKGROUND: The increasing prevalence of eczema suggests the role of environmental factors triggering a genetic predisposition. OBJECTIVE: To analyze the effect of environmental exposures in early life and genetic predisposition on the development of eczema before age 3 years. METHODS: The Copenhagen Study on Asthma in Childhood is a prospective clinical study of a birth cohort of 411 children bo…	N		X				N	X	X				N
313	Ovid MEDLINE(R)	The prevalence, characteristics of and risk factors for eczema in Belgian schoolchildren.	Pediatric Dermatology. 26(2):129-38, 2009 Mar-Apr.	Journal Article Research Support, Non-U.S. Gov't	2009	English	Click here for full text options	Childhood eczema is common in infants, but its nature and extent during later childhood remains unclear. In this cross-sectional study we examined the prevalence and characteristics of eczema in an unbiased community population of 2,021 Belgian schoolchildren, aged 3.4 to 14.8 years with skin prick testing and parental questionnaires. Our study identified an eczema prevalence of 23.3% and a consi…	N		X				N	X	X				N
314	Ovid MEDLINE(R)	Gene expression in canine atopic dermatitis and correlation with clinical severity scores.	Journal of Dermatological Science. 55(1):27-33, 2009 Jul.	Journal Article Research Support, Non-U.S. Gov't	2009	English	Click here for full text options	BACKGROUND: Canine atopic dermatitis (cAD) is a common condition in dogs that may be a naturally occurring model for human atopic dermatitis (hAD). Despite this, comparative research is limited, particularly into the genetic background of cAD. OBJECTIVES: 1. Measure candidate gene expression in cAD skin using quantitative real time PCR (qPCR). 2. Correlate gene expression to clinical cAD scores (…	Y						Y						Y	N	X					N	X					N
315	Ovid MEDLINE(R)	Performance characteristics of a monoclonal antibody cocktail-based ELISA for detection of allergen-specific IgE in dogs and comparison with a high affinity IgE receptor-based ELISA.	Veterinary Dermatology. 20(3):157-64, 2009 Jun.	Comparative Study Journal Article Research Support, Non-U.S. Gov't Validation Study	2009	English	10.1111 /j.1365-3164.2009.00740.x	The purpose of this study was to define the operational and performance characteristics of a commercially available monoclonal antibody based (mac) ELISA for detection of allergen-specific IgE in dogs. The average intra-assay variance over 1 year was 9.7% (range 2.5-62.7%), while the interassay variance averaged 10.8% (range 8.1-13.8%). The average positive control responses observed for grass, w…	Y						Y						Y	Y						Y						Y	Y						N	X						N
316	Ovid MEDLINE(R)	Efficacy of a 0.0584% hydrocortisone aceponate spray in the management of canine atopic dermatitis: a randomised, double blind, placebo-controlled trial.	Veterinary Dermatology. 20(3):191-8, 2009 Jun.	Journal Article Randomized Controlled Trial Research Support, Non-U.S. Gov't	2009	English	Click here for full text options	This study evaluated a 0.0584% hydrocortisone aceponate (HCA) spray (Cortavance; Virbac SA, Carros, France) in canine atopic dermatitis (AD). Initially, dogs with a canine AD extent and severity index (CADESI-03) >or= 50 were randomly allocated to receive HCA (n = 15) or placebo (n = 13) (two sprays from 10 cm away to treat an area of 100 cm(2)) once daily for 28 days. Twenty-one of the dogs then…	N	X					N	X					N
317	Ovid MEDLINE(R)	Pilot study of the effect of individualised homeopathy on the pruritus associated with atopic dermatitis in dogs.	Veterinary Record. 164(12):364-70, 2009 Mar 21.	Journal Article Randomized Controlled Trial Research Support, Non-U.S. Gov't	2009	English	Click here for full text options	Twenty dogs with confirmed atopic dermatitis were treated with homeopathy. In the first phase of this pilot study, all of the dogs were treated by a veterinary homeopath with individualised remedies prescribed on the basis of the dog's cutaneous signs and constitutional characteristics. The response to treatment was assessed by scoring the severity of pruritus from 0 to 10 on a validated scale. T…	N	X					N	X					N
318	Ovid MEDLINE(R)	A GeNorm algorithm-based selection of reference genes for quantitative real-time PCR in skin biopsies of healthy dogs and dogs with atopic dermatitis.	Veterinary Immunology & Immunopathology. 129(1-2):115-8, 2009 May 15.	Journal Article	2009	English	Click here for full text options	Quantitative real time PCR (Q-PCR) is the method of choice to study mRNA expression levels. Since Q-PCR is very sensitive, normalization of the data with stably expressed reference genes if of utmost importance. The stability of reference genes depends on the tissue and the species of interest. Therefore, evaluation of the stability of reference genes must be performed for each new tissue and spe…	Y						Y						Y	N	X					N	X					N
319	Ovid MEDLINE(R)	Allergen-specific IgE measurement with the IMMULITE 2000 system: intermethod comparison of detection performance for allergen-specific IgE antibodies from Korean allergic patients.	Clinica Chimica Acta. 401(1-2):25-32, 2009 Mar.	Comparative Study Journal Article Research Support, Non-U.S. Gov't	2009	English	Click here for full text options	BACKGROUND: Intermethod comparison between IMMULITE 2000 chemiluminescent enzyme immunoassay (CLEIA) and the established CAP test for allergen-specific IgE (sIgE) has only been evaluated by a few studies. METHODS: We performed such an interassay comparison using 283 Korean allergic patients with the following: asthma (18.4%), allergic rhinitis (18.4%), both asthma and allergic rhinitis (14.5%), a…	Y						N	X	X				Y	N	X	X				N		X				N
320	Ovid MEDLINE(R)	Dermatophagoides farinae-specific immunotherapy in atopic dogs with hypersensitivity to multiple allergens: a randomised, double blind, placebo-controlled study.	Veterinary Journal. 180(3):337-42, 2009 Jun.	Journal Article Multicenter Study Randomized Controlled Trial Research Support, Non-U.S. Gov't	2009	English	Click here for full text options	A randomised, placebo-controlled, double blind study was conducted on 25 dogs that had atopic dermatitis, together with skin test reactivity and elevated serum IgE to Dermatophagoides farinae (Df) and at least one additional allergen. Dogs were treated with either a Df-restricted immunotherapy solution (n=14) or a placebo (n=11) and evaluated 6 weeks and 3, 5, 7 and 9 months after the initiation …	N	X					Y						Y	N	X					Y						N
321	Ovid MEDLINE(R)	The efficacy of cyclosporine A in cats with presumed atopic dermatitis: a double blind, randomised prednisolone-controlled study.	Veterinary Journal. 180(1):55-9, 2009 Apr.	Journal Article Randomized Controlled Trial	2009	English	Click here for full text options	The objective of this study was to compare the efficacy of cyclosporine A (CsA) and prednisolone in feline atopic dermatitis (AD) in a randomised, controlled double blind study. Twenty-nine cats with feline AD were randomly allocated to two groups. Eleven cats were treated orally with prednisolone (1mg/kg SID) and 18 were treated with CsA (5mg/kg/day) for 4 weeks. At day 0 (D0) and D28, skin lesi…	N	X					N	X	X				N
322	Ovid MEDLINE(R)	[Canine atopic dermatitis]. [Review] [French]	Bulletin de l Academie Nationale de Medecine. 194(7):1357-64, 2010 Oct.	English Abstract Journal Article Review	2010	French	Click here for full text options	Canine atopic dermatitis is an inflammatory skin disease characterized by typical clinical signs and affecting up to 10 % of dogs aged from 1 to 3 years. The diagnosis is mainly clinical and the treatment is complex. This canine form may offer a good model of human atopic dermatitis, as the two diseases show many pathogenetic, clinical and therapeutic similarities.	N			X			N			X			N
323	Ovid MEDLINE(R)	The evaluation of Canine Atopic Dermatitis Extent and Severity Index (CADESI) test in dogs with atopic dermatitis (AD) treated with cyclosporine or prednisone.	Polish Journal of Veterinary Sciences. 13(4):681-8, 2010.	Journal Article	2010	English	Click here for full text options	The purpose of this study was to assess the clinical state of dogs with atopic dermatitis (AD) by use of CADESI test in own modification during the first visit in the Dermatology Consult Room as well as during the treatment. The study was performed in two groups (I-E and II-C) of 20 dogs in each group. In dogs which were qualified to the I-E group, as antiallergic, anti-inflammatory and antipruri…	N	X					Y						Y	N	X					N	X					N
324	Ovid MEDLINE(R)	Barazone decreases skin lesions and pruritus and increases quality of life in dogs with atopic dermatitis: a randomized, blinded, placebo-controlled trial.	Journal of Veterinary Pharmacology & Therapeutics. 33(6):573-82, 2010 Dec.	Journal Article Randomized Controlled Trial Research Support, Non-U.S. Gov't	2010	English	Click here for full text options	A randomized, blinded, placebo-controlled study was conducted to assess the efficacy of a new 0.025% budesonide leave-on-conditioner (Barazone) in controlling the clinical signs of canine atopic dermatitis (AD). Twenty-nine dogs with AD were randomly allocated to receive 3 weeks of once-weekly treatment with either Barazone or Placebo and then were crossed-over to receive the alternative treatmen…	N	X					N	X					N
325	Ovid MEDLINE(R)	Presumptive Nocardia spp. infection in a dog treated with cyclosporin and ketoconazole.	New Zealand Veterinary Journal. 58(5):265-8, 2010 Oct.	Case Reports Journal Article	2010	English	Click here for full text options	CASE HISTORY: A dog that had received 8 months of cyclosporin and ketoconazole therapy for treatment of atopic dermatitis subsequently developed severe neurological disease, that failed to respond to treatment with trimethoprim-sulphadiazine and clindamycin. HISTOPATHOLOGICAL FINDINGS: Histopathological examination of the pulmonary parenchyma and spinal cord revealed loose aggregates of Gram-posi…	N	X					N	X					N
326	Ovid MEDLINE(R)	Evaluation of fungal flora in normal and diseased canine ears.	Veterinary Dermatology. 21(6):619-25, 2010 Dec.	Journal Article Research Support, Non-U.S. Gov't	2010	English	Click here for full text options	This study was undertaken to characterize otic fungal flora encountered in normal dogs, atopic dogs with no clinical or cytological evidence of otitis and dogs with otitis externa. Forty-two normal dogs, 23 atopic dogs and 32 dogs with otitis were included in the study. Samples for otic fungal culture and cytology were obtained from all animals, for a total of 194 ears. Sixty-seven ear samples (3…	N	X					N	X					N
327	Ovid MEDLINE(R)	Clinical efficacy of a novel elimination diet composed of a mixture of amino acids and potatoes in dogs with non-seasonal pruritic dermatitis.	Journal of Veterinary Medical Science. 72(11):1413-21, 2010 Nov.	Journal Article Research Support, Non-U.S. Gov't	2010	English	Click here for full text options	There has been a need for improvement of the elimination diet used for diagnosis of adverse food reaction (AFR) in dogs. Recently, a novel elimination diet composed of a mixture of amino acids and potatoes was developed. We evaluated the efficacy of the elimination diet for diagnosis of AFR in dogs. Twenty dogs that were suspected to have allergic dermatitis were enrolled in a 2-month food elimin…	N	X					N	X					N
328	Ovid MEDLINE(R)	Canine atopic dermatitis: what's new?. [Review]	Compendium: Continuing Education for Veterinarians. 32(2):E1-4, 2010 Feb.	Journal Article Review	2010	English	Click here for full text options	Much progress has been made in understanding canine atopic dermatitis (AD), its triggering factors, and the best approach to its diagnosis and management. This article discussess the clinical features of AD, the pitfalls of allergy testing, and how recent research developments can influence the clinical management of this condition. Of particular interest is the accumulating evidence of skin barr…	N			X			N			X			N
329	Ovid MEDLINE(R)	Heterogeneity of Staphylococcus pseudintermedius isolates from atopic and healthy dogs.	Veterinary Dermatology. 21(6):578-85, 2010 Dec.	Journal Article Research Support, Non-U.S. Gov't	2010	English	Click here for full text options	Staphylococcus pseudintermedius is part of the normal canine flora but frequently causes pyoderma in canine atopic dermatitis (AD). This study aimed to determine whether particular S. pseudintermedius strains were associated with AD and/or pyoderma. Ninety-six S. pseudintermedius isolates from the ear, nares, perineum and lesions of 21 atopic and 16 healthy dogs were lysed with proteinase K and d…	Y						N	X					Y	N	X					N	X					N
330	Ovid MEDLINE(R)	A comparison of the clinical manifestations of feeding whole and hydrolysed chicken to dogs with hypersensitivity to the native protein.	Veterinary Dermatology. 21(4):358-66, 2010 Aug.	Journal Article Randomized Controlled Trial Research Support, Non-U.S. Gov't	2010	English	Click here for full text options	Twenty-six dogs with known adverse food reactions were fed whole chicken for 14 days. From this group, 12 dogs with cutaneous manifestations following exposure to chicken meat were selected and randomly divided into two groups (n = 6). Each group was then fed hydrolysed chicken or hydrolysed soy for 14 days in a blinded crossover design with a 17-day washout period between each diet. Assessments …	N	X	X				N	X					N
331	Ovid MEDLINE(R)	Accuracy of a point-of-care testing device in children with suspected respiratory allergy.	Allergy & Asthma Proceedings. 31(2):e11-7, 2010 Mar-Apr.	Journal Article Research Support, Non-U.S. Gov't	2010	English	Click here for full text options	Measuring IgE antibodies is useful in the diagnostic workup of allergy and asthma. This study was designed to assess the value of a new point-of-care test (ImmunoCAP Rapid Wheeze-Rhinitis Child [ICR]; Phadia AB, Uppsala, Sweden) in the diagnosis of atopy in children with allergy-like symptoms such as rhinitis, eczema, and recurrent episodes of wheezing. Patients (n = 175; average age, 7.2 years) …	N		X				N	X	X				N
332	Ovid MEDLINE(R)	[Interpretation of laboratory tests for allergies in dogs]. [German]	Schweizer Archiv fur Tierheilkunde. 152(3):120-2, 2010 Mar.	English Abstract Journal Article	2010	German	Click here for full text options	There is widespread use of serum allergy tests which are promoted for identifying the reaction against certain allergens in atopic dermatitis, sarcoptes infestation and also food hypersensitivity in dogs. Around 20 years ago the first in-vitro tests were developed to identify allergen-specific IgE in dogs with atopic dermatitis. Since then, technical developments have markedly improved the qualit…	Y						N				X		Y	N	X					N	X					N
333	Ovid MEDLINE(R)	Determination of irritant threshold concentrations to weeds, trees and grasses through serial dilutions in intradermal testing on healthy clinically nonallergic dogs.	Veterinary Dermatology. 21(2):192-7, 2010 Apr.	Journal Article Research Support, Non-U.S. Gov't	2010	English	Click here for full text options	Irritant threshold concentration (ITC) for intradermal testing (IDT) was determined in 31 healthy, clinically nonallergic dogs. Twenty-three allergens were tested at five variable concentrations ranging from 1000 to 8000 PNU/mL. To distinguish irritant reactions from subclinical IgE-mediated hypersensitivities, serum allergy testing was performed. ITCs were determined by evaluating the lowest con…	Y						Y						Y	Y						Y						Y	Y						N	X						N
334	Ovid MEDLINE(R)	Investigation on the effects of ciclosporin (Atopica) on intradermal test reactivity and allergen-specific immunoglobulin (IgE) serology in atopic dogs.	Veterinary Dermatology. 21(4):393-9, 2010 Aug.	Journal Article Randomized Controlled Trial Research Support, Non-U.S. Gov't	2010	English	Click here for full text options	The ability to use ciclosporin (Atopica R: Novartis Animal Health, Greensboro, NC, USA) prior to intradermal testing (IDT) would help avoid exacerbation of clinical disease that can be associated with drug withdrawal. This study evaluated the effects of 30 days of administration of ciclosporin at a dose of 5 mg/kg once daily on IDT reactivity (immediate phase reactions) in a group of dogs with at…	N	X					N	X					N
335	Ovid MEDLINE(R)	New diagnostic criteria for canine atopic dermatitis.	Veterinary Dermatology. 21(1):123-6, 2010 Feb.	Letter	2010	English	https://doi-org.udea.lookproxy.com/10.1111/j.1365-3164.2009.00776.x	Letter to the Editor_x000D_	Y						Y						Y	N	X		X			N	X					N
336	Ovid MEDLINE(R)	The glucocorticoid sparing efficacy of Phytopica in the management of canine atopic dermatitis.	Veterinary Dermatology. 21(1):96-105, 2010 Feb.	Journal Article Randomized Controlled Trial Research Support, Non-U.S. Gov't	2010	English	Click here for full text options	This double-blind randomized placebo-controlled trial indicates that Phytopica can be an effective glucocorticoid sparing agent in canine atopic dermatitis (AD). Twenty-two dogs with perennial AD [Canine Atopic Dermatitis with Severity Index (CADESI-03) >or= 60] were given 200 mg/kg Phytopica or an identical placebo in food once daily for 56 days. All dogs were initially given 0.4 mg/kg methyl-pr…	N	X					N	X					N
337	Ovid MEDLINE(R)	A prospective study on the clinical features of chronic canine atopic dermatitis and its diagnosis.	Veterinary Dermatology. 21(1):23-31, 2010 Feb.	Journal Article Research Support, Non-U.S. Gov't	2010	English	10.1111/j.1365-3164.2009.00758.x	Canine atopic dermatitis (CAD) is a multifaceted disease associated with exposure to various offending agents such as environmental and food allergens. The diagnosis of this condition is difficult because none of the typical signs are pathognomonic. Sets of criteria have been proposed but are mainly used to include dogs in clinical studies. The goals of the present study were to characterize the …	Y						Y						Y	Y						Y						Y	N						N	X						N
338	Ovid MEDLINE(R)	Interventions for atopic dermatitis in dogs: a systematic review of randomized controlled trials. [Review] [67 refs]	Veterinary Dermatology. 21(1):4-22, 2010 Feb.	Journal Article Review Systematic Review	2010	English	Click here for full text options	The objective of this systematic review, which was performed following the guidelines of the Cochrane collaboration, was to assess the effects of interventions for treatment of atopic dermatitis (AD) in dogs. Citations identified from three databases (MEDLINE, Thomson's Science Citation Index Expanded and CAB Abstracts) and trials published by December 2007 were selected. Proceedings books from t…	N			X			N			X			N
339	Ovid MEDLINE(R)	A randomized, double-blind, placebo-controlled study to evaluate the effect of EFF1001, an Actinidia arguta (hardy kiwi) preparation, on CADESI score and pruritus in dogs with mild to moderate atopic dermatitis.	Veterinary Dermatology. 21(1):50-7, 2010 Feb.	Journal Article Randomized Controlled Trial Research Support, Non-U.S. Gov't	2010	English	Click here for full text options	Canine atopic dermatitis (AD) is common and new therapies are beneficial. This multicentric, randomized, double-blind, placebo-controlled study tested the efficacy of Actinidia arguta (hardy kiwi) (EFF1001) in dogs with mild/moderate AD. The study was divided into two stages. Stage 1 lasted 6 weeks. In the first 2 weeks prednisolone [days 1-3: 0.2 mg/kg twice daily (BID), days 4-14: 0.2 mg/kg eve…	N	X					N	X					N
340	Ovid MEDLINE(R)	Intra- and interlaboratory variability of allergen-specific IgE levels in atopic dogs in three different laboratories using the Fc-epsilon receptor testing.	Veterinary Immunology & Immunopathology. 133(2-4):183-9, 2010 Feb 15.	Comparative Study Evaluation Study Journal Article Research Support, Non-U.S. Gov't	2010	English	10.1016/j.vetimm.2009.07.019	The IgE specific Fc-epsilon receptor test is widely used for serological evaluation of allergic canine patients. Aim of the study was to evaluate intra- and interlaboratory variability in three independent laboratories. Duplicate serum aliquots from 15 atopic dogs were submitted simultaneously to 3 laboratories (LA, LB, LC), which subsequently performed the test in a blinded fashion. LA and LC an…	Y						Y						Y	Y						Y						Y	Y						Y							Y
341	Ovid MEDLINE(R)	A systematic review of the evidence of reduced allergenicity and clinical benefit of food hydrolysates in dogs with cutaneous adverse food reactions. [Review] [45 refs]	Veterinary Dermatology. 21(1):32-41, 2010 Feb.	Journal Article Review Systematic Review	2010	English	Click here for full text options	Several hydrolysate-based diets have been commercialized for helping diagnose or treat dogs with cutaneous adverse food reactions (CAFR). This systematic review was performed to examine the evidence in favour of reduced immunological and clinical allergenicity of hydrolysates in dogs with CAFR. Citation databases, meeting abstracts and article bibliographies were scanned for relevant citations, a…	N	X					N	X		X			N
342	Ovid MEDLINE(R)	PTPN22 polymorphisms may indicate a role for this gene in atopic dermatitis in West Highland white terriers.	BMC Research Notes. 4:571, 2011 Dec 30.	Journal Article	2011	English	Click here for full text options	BACKGROUND: Canine atopic dermatitis is an allergic inflammatory skin disease common in West Highland white terriers. A genome-wide association study for atopic dermatitis in a population of West Highland white terriers identified a 1.3 Mb area of association on CFA17 containing canine protein tyrosine phosphatase non-receptor type 22 (lymphoid) PTPN22. This gene is a potential candidate gene for…	Y						N	X					Y	N	X					N	X					N
343	Ovid MEDLINE(R)	Characterization of patients with suspected seminal plasma hypersensitivity.	Allergy & Asthma Proceedings. 32(6):467-71, 2011 Nov-Dec.	Journal Article	2011	English	Click here for full text options	The epidemiology of seminal plasma hypersensitivity (SPH) is unknown. Case reports and a previous survey have identified two distinct phenotypes: localized and systemic reactors. The objective of this study was to use an Internet-based questionnaire to characterize and examine the differences among a population of women with suspected SPH. A questionnaire designed to distinguish women with probab…	N	X					N	X	X				N
344	Ovid MEDLINE(R)	Indoor allergen sensitization and the risk of asthma and eczema in children in Pittsburgh.	Allergy & Asthma Proceedings. 32(5):372-6, 2011 Sep-Oct.	Journal Article	2011	English	Click here for full text options	Several studies have shown that sensitization to cockroach and mouse allergens is correlated with presence and severity of asthma, especially among children living in inner cities. This study evaluated the prevalence of positive skin testing to indoor allergens in the Pittsburgh area and the association with asthma and eczema. A retrospective analysis was performed of 540 children from the Pittsb…	N		X				N	X	X				N
345	Ovid MEDLINE(R)	Comparison of subjective and objective intradermal allergy test scoring methods in dogs with atopic dermatitis.	Journal of the American Animal Hospital Association. 47(6):399-405, 2011 Nov-Dec.	Evaluation Study Journal Article	2011	English	10.5326/JAAHA-MS-5638	An intradermal allergy test (IDT) is an important diagnostic tool for identifying offending allergens in canine atopic dermatitis. No standardized method of scoring an IDT has been described. The purpose of this study was to determine whether there is a correlation between a conventional, subjective IDT scoring method based on perceived wheal diameter, erythema, and turgor (0-4+) and an objective…	Y						Y						Y	Y						Y						Y	Y						Y							Y
346	Ovid MEDLINE(R)	Fatty acid patterns of dog erythrocyte membranes after feeding of a fish-oil based DHA-rich supplement with a base diet low in n-3 fatty acids versus a diet containing added n-3 fatty acids.	Acta Veterinaria Scandinavica. 53:57, 2011 Oct 24.	Journal Article Randomized Controlled Trial Research Support, Non-U.S. Gov't	2011	English	Click here for full text options	BACKGROUND: In dogs, increasing the tissue n-3 fatty acid (FA) content is associated with potential benefit in some medical conditions, e.g. atopic dermatitis, cancer or heart disease. Therefore effectively and conveniently increasing tissue n-3 FA levels in dogs is of interest. Incorporation of dietary n-3 FA into cell membranes may be studied by FA analysis of erythrocyte membranes (EM), becaus…	N	X					N	X					N
347	Ovid MEDLINE(R)	[Laboratory animal; allergy; asthma]. [Review] [Italian]	Medicina del Lavoro. 102(5):428-44, 2011 Sep-Oct.	English Abstract Journal Article Review	2011	Italian	Click here for full text options	Laboratory animal allergy (LAA) may develop when susceptible persons are exposed to allergens produced by laboratory animals. LAA is associated with exposure to urine, fur, and salivae of rats, guinea pigs, dogs and rabbits. Approximately 30% of persons who are exposed to laboratory animals may develop LAA and some will also develop asthma. LAA is most likely to occur in persons with previously k…	N			X			N	X	X		X		N
348	Ovid MEDLINE(R)	Allergic conjunctivitis and conjunctival provocation tests in atopic dogs.	Veterinary Ophthalmology. 14(4):248-56, 2011 Jul.	Evaluation Study Journal Article	2011	English	Click here for full text options	INTRODUCTION: Canine atopic dermatitis (cAD) is a very common disease, but little is known about eye involvement. The conjunctival provocation test (CPT) is used in human to study the ocular response to allergenic stimuli and to evaluate anti-allergic therapy. To our knowledge it has not been used in dogs. OBJECTIVES: To evaluate the prevalence of ocular signs in a population of atopic dogs and r…	N	X					Y						Y	N	X					N	X					N
349	Ovid MEDLINE(R)	The study of canine atopic dermatitis involving the isolation of dogs.	Polish Journal of Veterinary Sciences. 14(2):273-7, 2011.	Journal Article	2011	English	Click here for full text options	Twenty-seven pruritic dogs were used in this study. When a hypoallergenic diet was fed to these 27 dogs for six weeks, none of the dogs showed improvement of the pruritus. These dogs had a history and clinical signs of atopic dermatitis (AD) as defined by Prelaud's diagnostic criteria. Subsequently, the 27 dogs were isolated for observation for two weeks in the hospital. In the isolation room in …	Y						Y						Y	Y						N	X					N
350	Ovid MEDLINE(R)	Lesional skin in atopic dogs shows a mixed Type-1 and Type-2 immune responsiveness.	Veterinary Immunology & Immunopathology. 143(1-2):20-6, 2011 Sep 15.	Journal Article Research Support, Non-U.S. Gov't	2011	English	10.1016/j.vetimm.2011.05.025	Canine atopic dermatitis (AD) is a chronic inflammatory and pruritic skin disease which shares several characteristics with its human counterpart. In chronic patch test lesions of human with AD mainly a Th1-type cellular response is found. Besides, non-lesional AD skin is already skewed for inflammation and therefore different from healthy skin. The goal of this study was to characterize local im…	Y						Y						Y	N	X					N	X					N
351	Ovid MEDLINE(R)	Flow cytometric analysis of lymphocyte proliferative responses to food allergens in dogs with food allergy.	Journal of Veterinary Medical Science. 73(10):1309-17, 2011 Oct.	Controlled Clinical Trial Journal Article Research Support, Non-U.S. Gov't	2011	English	Click here for full text options	Two different allergy tests, antigen-specific immunoglobulin E quantification (IgE test) and flow cytometric analysis of antigen-specific proliferation of peripheral lymphocytes (lymphocyte proliferation test), were performed to examine differences in allergic reactions to food allergens in dogs with food allergy (FA). Thirteen dogs were diagnosed as FA based on clinical findings and elimination …	N	X					N	X					N
352	Ovid MEDLINE(R)	Masitinib decreases signs of canine atopic dermatitis: a multicentre, randomized, double-blind, placebo-controlled phase 3 trial.	Veterinary Dermatology. 22(6):554-64, 2011 Dec.	Clinical Trial, Phase III Journal Article Multicenter Study Randomized Controlled Trial Research Support, Non-U.S. Gov't	2011	English	Click here for full text options	This study investigated the efficacy and safety of masitinib, a selective tyrosine kinase inhibitor capable of downregulating mast cell functions, for treatment of canine atopic dermatitis (CAD). Dogs with confirmed CAD received masitinib at 12.5 mg/kg/day (n = 202) or control (n = 104) for 12 weeks. A reduction in CAD Extent and Severity Index (CADESI-02) score of >= 50% at week 12 was observed …	N	X					N	X					N
353	Ovid MEDLINE(R)	Canine atopy - inside out, or outside in?.	Veterinary Record. 168(20):533-4, 2011 May 21.	Comment Editorial	2011	English	https://doi-org.udea.lookproxy.com/10.1136/vr.d3005	Letter to the Editor	Y						Y						Y	N	X		X			N						N
354	Ovid MEDLINE(R)	The results of intradermal skin tests (IDST) in dogs with atopic dermatitis from the Lublin voivodeship.	Polish Journal of Veterinary Sciences. 14(1):95-101, 2011.	Journal Article Research Support, Non-U.S. Gov't	2011	English	10.2478/v10181-011-0014-y	The purpose of this study was to assess the positive immediate reactions received from intradermal skin tests (IDST) which confirmed the presence of IgE-dependent hypersensitivity in dogs with atopic dermatitis, which were patients of the Dermatology Consulting Section at the University of Life Sciences in Lublin between 2007 and 2009. Intradermal skin tests were performed on 142 dogs (72 females…	Y						Y						Y	Y						N	X				X	Y	Y						Y							Y
355	Ovid MEDLINE(R)	Evaluation of patch test with airbone allergic agents in patients with atopic dermatitis.	Anais Brasileiros de Dermatologia. 86(1):37-43, 2011 Jan-Feb.	Evaluation Study Journal Article	2011	English	Click here for full text options	BACKGROUND: Atopic dermatitis is an inflammatory skin disease that can be triggered by many factors. Several reports confirm the role of airborne allergic agents as aggravating or triggering factors. The patch test with airborne allergic agents or the atopy patch test was suggested to evaluate the role of these allergens in atopic dermatitis. OBJECTIVE: This study aimed at evaluating the positivi…	Y						N	X	X				Y	Y						N		X				N
356	Ovid MEDLINE(R)	Quality of life of dogs with skin disease and of their owners. Part 2: administration of a questionnaire in various skin diseases and correlation to efficacy of therapy.	Veterinary Dermatology. 22(4):344-51, 2011 Aug.	Journal Article Multicenter Study	2011	English	Click here for full text options	A previously validated 15-item questionnaire on dogs' life quality (QoL1) and that of their owners (QoL2) was applied in a multicentre study to owners of 200 dogs with different dermatological conditions, together with a question on the owner-perceived disease severity (S). Factor analysis was applied to the whole questionnaire. The correlation of S with QoL1 and QoL2 scores was evaluated using S…	N	X					N	X					N
357	Ovid MEDLINE(R)	Clinical comparison of human and canine atopic dermatitis using human diagnostic criteria (Japanese Dermatological Association, 2009): proposal of provisional diagnostic criteria for canine atopic dermatitis.	Journal of Dermatology. 38(8):784-90, 2011 Aug.	Comparative Study Evaluation Study Journal Article	2011	English	10.1111 /j.1346-8138.2010.01136.x	Atopic dermatitis (AD) is a common skin disease encountered in both humans and dogs. Canine AD can be used in the analysis of naturally occurring AD; however, details of clinical comparison have been lacking. The purpose of this study is to compare those clinical features using the human diagnostic criteria (Japanese Dermatological Association, 2009). Fifty-one dogs with canine AD were evaluated …	N		X				Y						Y	Y						Y						Y	N						N	X						N
358	Ovid MEDLINE(R)	Sterile panniculitis in dogs: new diagnostic findings and alternative treatments.	Veterinary Dermatology. 22(4):352-9, 2011 Aug.	Clinical Trial Journal Article	2011	English	Click here for full text options	The objective of this study was to analyse the underlying diseases, diagnostic findings and treatment outcomes in 10 dogs with sterile panniculitis. There was no significant breed association in this study (P = 0.86). The median age of the dogs was 7.4 years. Concurrent diseases included atopic dermatitis (four dogs), acute pancreatitis (two dogs) and primary hypoadrenocorticism (one dog), with n…	N	X					N	X					N
359	Ovid MEDLINE(R)	High allergen-specific serum immunoglobulin E levels in nonatopic West Highland white terriers.	Veterinary Dermatology. 22(3):257-66, 2011 Jun.	Journal Article Research Support, Non-U.S. Gov't	2011	English	Click here for full text options	Human and canine atopic dermatitis (AD) share an association with IgE specific to environmental allergens, but few studies have evaluated serum allergen-specific IgE in nonatopic dogs. This study compared serum allergen-specific IgE levels in 30 atopic and 18 nonatopic West Highland white terriers. Atopic dermatitis was confirmed using standard criteria. Nonatopic dogs were over 5 years of age an…	Y						N	X					Y	Y						N	X					N
360	Ovid MEDLINE(R)	Stratum corneum removal facilitates experimental sensitization to mite allergens in atopic dogs.	Veterinary Dermatology. 22(2):188-96, 2011 Apr.	Journal Article	2011	English	Click here for full text options	In humans with atopic dermatitis and in mouse models of IgE-mediated allergic diseases, evidence is mounting that the stratum corneum (SC) provides an important barrier against environmental allergens. At this time, it is not known whether the SC has a similar role in dogs, especially in those with atopic dermatitis. The objectives of this pilot study were to determine whether SC removal led to e…	Y						N	X					Y	Y						N	X					N
361	Ovid MEDLINE(R)	Ciclosporin A therapy is associated with disturbances in glucose metabolism in dogs with atopic dermatitis.	Veterinary Dermatology. 22(2):173-80, 2011 Apr.	Clinical Trial Journal Article Research Support, Non-U.S. Gov't	2011	English	Click here for full text options	The effect of ciclosporin A (CsA) on glucose homeostasis was investigated in 16 dogs with atopic dermatitis by determining plasma glucose, serum fructosamine and insulin concentrations, and serial insulin and glucose concentrations following a glucagon stimulation test, before and 6 weeks after CsA therapy at 5 mg/kg once daily. All dogs completed the study. Following CsA treatment, the median se…	N	X					N	X					N
362	Ovid MEDLINE(R)	Evaluation of the agreement between allergen-specific intradermal or IgE serological tests and a point-of-care immunodot assay in dogs with atopic dermatitis.	Veterinary Dermatology. 22(3):284-5, 2011 Jun.	Comparative Study Evaluation Study Letter	2011	English	https://doi-org.udea.lookproxy.com/10.1111/j.1365-3164.2010.00936.x	Letter to the Editor	Y						Y						Y	N	X		X			N						N
363	Ovid MEDLINE(R)	Breed-associated phenotypes in canine atopic dermatitis.	Veterinary Dermatology. 22(2):143-9, 2011 Apr.	Journal Article Research Support, Non-U.S. Gov't	2011	English	10.1111 /j.1365-3164.2010.00925.x	Canine atopic dermatitis is a multifaceted disease, whose clinical presentation may be affected by numerous factors, including the genetic background of the animal, the environment, the offending allergens and flare factors. In particular, breed-associated differences have often been mentioned but never defined precisely. Using a large data set of atopic dogs, we document in this study the clinic…	Y						N	X					Y	Y						Y						Y	N						N	X						N
364	Ovid MEDLINE(R)	Opposing effects of cat and dog ownership and allergic sensitization on eczema in an atopic birth cohort.	Journal of Pediatrics. 158(2):265-71.e1-5, 2011 Feb.	Journal Article Research Support, N.I.H., Extramural	2011	English	Click here for full text options	OBJECTIVE: To examine risk factors for eczema at age 4 years. STUDY DESIGN: Beginning at 1 year of age, infants of atopic parents (n = 636) had annual clinical evaluations and skin prick tests (SPTs) to 15 aeroallergens and milk and egg. Parents completed validated surveys on eczema and environmental exposures. House dust samples were evaluated for allergens and endotoxin. Eczema was defined as a…	N		X				N	X					N
365	Ovid MEDLINE(R)	Serum allergen-specific immunoglobulin E in atopic and healthy cats: comparison of a rapid screening immunoassay and complete-panel analysis.	Veterinary Dermatology. 22(1):39-45, 2011 Feb.	Evaluation Study Journal Article	2011	English	Click here for full text options	Feline and canine atopic dermatitis are thought to have a similar immunopathogenesis. As with dogs, detection of allergen-specific IgE in cat serum merely supports a diagnosis of feline atopy based on compatible history, clinical signs and elimination of other pruritic dermatoses. In this study, a rapid screening immunoassay (Allercept( R) E-Screen 2nd Generation; Heska AG, Fribourg, Switzerland;…	N		X				N		X				N
366	Ovid MEDLINE(R)	Putative peanut allergy-induced urticaria in a dog.	Canadian Veterinary Journal. 53(11):1203-6, 2012 Nov.	Case Reports Journal Article Research Support, Non-U.S. Gov't	2012	English	Click here for full text options	A 9-year-old, spayed male schnauzer dog was presented with vomiting, diarrhea, generalized erythema, pruritic urticaria and conjunctival hyperemia after ingestion of peanut. The history, clinical signs, and histopathology of the lesions were compatible with a hypersensitivity reaction. The clinical signs resolved rapidly after treatment with prednisolone and antihistamine. This is the first repor…	N	X					N	X		X			N
367	Ovid MEDLINE(R)	[Analysis of inhaled allergen spectrum of children with allergic rhinitis in Guangzhou]. [Chinese]	Lin Chuang Er Bi Yan Hou Tou Jing Wai Ke Za Zhi = Journal Of Clinical Otorhinolaryngology, Head, & Neck Surgery. 26(22):1026-9, 2012 Nov.	English Abstract Journal Article	2012	Chinese	Click here for full text options	OBJECTIVE: To explore the inhaled allergen distribution of children with allergic rhinitis in Guangzhou area and to analyze the relevant factors. METHOD: Six hundred and twenty-six cases children in Guangzhou region diagnosed with allergic rhinitis from January 2009 to December 2011 in our outpatient department were tested with skin prick test (SPT). Ten of standardized common inhaled allergens w…	N		X		X		N	X	X		X		N
368	Ovid MEDLINE(R)	Tinea faciei by Microsporum gypseum mimicking allergic reaction following cosmetic tattooing of the eyebrows.	Medical Mycology Journal. 53(4):263-6, 2012.	Case Reports Journal Article	2012	English	Click here for full text options	A 63-year-old healthy female patient presented with well defined itchy erythematous lesions on the area of her eyebrows. Her eyebrows had been tattooed two months before her visit to us. The lesions had previously been treated by application of steroid ointment and anti-histamine and steroid tablets by mouth without success. We suspected the lesions to be contact dermatitis caused by some metal e…	N	X					N	X	X				N
369	Ovid MEDLINE(R)	Development and validation of the Canine Atopic Dermatitis Lesion Index, a scale for the rapid scoring of lesion severity in canine atopic dermatitis.	Veterinary Dermatology. 23(6):515-e103, 2012 Dec.	Journal Article Multicenter Study	2012	English	Click here for full text options	BACKGROUND: The third iteration of the Canine Atopic Dermatitis Extent and Severity Index (CADESI-03) is the only tool rigorously validated for canine atopic dermatitis (CAD) lesion scoring. The CADESI-03 requires 248 evaluations, limiting its widespread use. HYPOTHESIS/OBJECTIVES: The goal of the study was to develop and validate a practical method of grading CAD lesions that requires scoring on…	Y						Y						Y	N	X					Y						N
370	Ovid MEDLINE(R)	Validation of a novel epicutaneous delivery system for patch testing of house dust mite-hypersensitive dogs.	Veterinary Dermatology. 23(6):525-e106, 2012 Dec.	Journal Article	2012	English	10.1111/j.1365-3164.2012.01111.x	BACKGROUND: Patch tests with allergens are used for the evaluation of cellular hypersensitivity to food and environmental allergens in dogs and humans with atopic dermatitis. Viaskin is a novel allergen epicutaneous delivery system that enhances epidermal allergen capture by immune cells. OBJECTIVES: To compare the use of Viaskin and Finn chamber patch tests in dogs hypersensitive to mite allerge…	Y						N	X					Y	Y						Y						Y	Y						Y							Y
371	Ovid MEDLINE(R)	Characterization of pruritus in canine atopic dermatitis, flea bite hypersensitivity and flea infestation and its role in diagnosis.	Veterinary Dermatology. 23(6):487-e93, 2012 Dec.	Journal Article	2012	English	Click here for full text options	BACKGROUND: In dogs, flea infestation (FI), flea bite hypersensitivity (FBH) and canine atopic dermatitis (CAD) have been mainly characterized by their lesions but never by their pruritus. In clinical practice, many of these dogs exhibit only pruritus. HYPOTHESIS/OBJECTIVES: The purpose of this study was to evaluate the characteristics of pruritus in these dermatoses and their potential usefulnes…	N	X					N	X					N
372	Ovid MEDLINE(R)	Prevalence of allergic rhinitis and types of sensitized allergen in adult at Wat Intaram community, Hua Raeu, Phra Nakhon Si Ayutthaya District, Phra Nakhon Si Ayutthaya Province, Thailand.	Journal of the Medical Association of Thailand. 95 Suppl 5:S63-8, 2012 May.	Journal Article	2012	English	Click here for full text options	UNLABELLED: Allergic rhinitis is a common problem in many countries. The incidence of Allergic rhinitis is about 10-25% of the population and increasing worldwide especially in large cities where air pollution is the main problem causing respiratory illness. In Thailand, the surveys of allergic rhinitis on children were found about 13-44% while the prevalence of allergic rhinitis in Thai adults w…	N		X				N	X	X				N
373	Ovid MEDLINE(R)	Racial disparities in allergic outcomes in African Americans emerge as early as age 2 years.	Clinical & Experimental Allergy. 42(6):909-17, 2012 Jun.	Journal Article Research Support, N.I.H., Extramural Research Support, Non-U.S. Gov't	2012	English	Click here for full text options	BACKGROUND: Racial disparities in allergic disease outcomes have been reported with African Americans suffering disproportionately compared to White individuals. OBJECTIVE: To examine whether or not racial disparities are present as early as age 2 years in a racially diverse birth cohort in the Detroit metropolitan area. METHODS: All children who were participants in a birth cohort study in the D…	N		X				N	X	X				N
374	Ovid MEDLINE(R)	Sensitization and allergic histories differ between black and white pregnant women.	Journal of Allergy & Clinical Immunology. 130(3):657-662.e2, 2012 Sep.	Journal Article Research Support, N.I.H., Extramural	2012	English	Click here for full text options	BACKGROUND: Racial differences in allergic diseases have been reported, with black subjects suffering disproportionately compared with white subjects, although such studies have been more commonly done in pediatric populations. OBJECTIVE: We sought to determine whether there are differences in rates of allergic sensitization or prior diagnoses of asthma, hay fever, or eczema in black and white pr…	N		X				N	X	X				N
375	Ovid MEDLINE(R)	Evaluation of the effect of a 0.0584% hydrocortisone aceponate spray on clinical signs and skin barrier function in dogs with atopic dermatitis.	Journal of Veterinary Science. 13(2):187-91, 2012 Jun.	Journal Article Research Support, Non-U.S. Gov't	2012	English	Click here for full text options	The purpose of this study was to evaluate the effects of a topical spray containing 0.0584% hydrocortisone aceponate (HCA) on canine atopic dermatitis (CAD) and to evaluate the skin barrier function during the treatment of CAD. Twenty-one dogs that fulfilled the diagnostic criteria for CAD were included in this study. The HCA spray was applied once a day to the lesions of all dogs for 7 or 14 day…	N	X					N	X					N
376	Ovid MEDLINE(R)	Double-blinded, placebo-controlled study to evaluate an antipruritic shampoo for dogs with allergic pruritus.	Veterinary Record. 171(4):97, 2012 Jul 28.	Journal Article Randomized Controlled Trial	2012	English	Click here for full text options	Shampoo therapy is frequently used on pruritic dogs. However, there are few double-blinded, placebo-controlled studies of this form of therapy. This randomised, double-blinded, placebo-controlled study evaluated the efficacy of a commercial medicated shampoo (DermaTopic; Almapharm) containing chlorhexidine, lactoferrin, piroctone olamine, chitosan and essential fatty acids in 27 dogs with mild to…	N	X					N	X					N
377	Ovid MEDLINE(R)	Owner assessment of therapeutic interventions for canine atopic dermatitis: a long-term retrospective analysis.	Veterinary Dermatology. 23(3):228-e47, 2012 Jun.	Journal Article Research Support, Non-U.S. Gov't	2012	English	Click here for full text options	BACKGROUND: Canine atopic dermatitis is a frequent diagnosis in veterinary medicine; however, the long-term prognosis for canine atopic dermatitis has not been evaluated in a systematic fashion. HYPOTHESIS/OBJECTIVES: To compare the relative efficacy of commonly used therapies for canine atopic dermatitis in two groups of dogs over 5 and 10 year time periods. ANIMALS: Dogs were identified from th…	N	X					N	X					N
378	Ovid MEDLINE(R)	Protection from childhood asthma and allergy in Alpine farm environments-the GABRIEL Advanced Studies.	Journal of Allergy & Clinical Immunology. 129(6):1470-7.e6, 2012 Jun.	Journal Article Multicenter Study Research Support, Non-U.S. Gov't	2012	English	Click here for full text options	BACKGROUND: Studies on the association of farm environments with asthma and atopy have repeatedly observed a protective effect of farming. However, no single specific farm-related exposure explaining this protective farm effect has consistently been identified. OBJECTIVE: We sought to determine distinct farm exposures that account for the protective effect of farming on asthma and atopy. METHODS:…	N		X				N	X	X				N
379	Ovid MEDLINE(R)	What can dogs bring to atopic dermatitis research?.	Chemical Immunology & Allergy. 96:61-72, 2012.	Journal Article	2012	English	Click here for full text options	Besides humans, dogs are the only animals that naturally develop skin lesions of atopic dermatitis (AD). In the last two decades, numerous studies have helped establish the close similarity between human and canine AD at the pathogenesis, clinical, epidemiological and therapeutic levels. The study of dogs with AD could potentially be very useful to human AD research because of the species' histor…	Y						N		X				Y	N	X					Y						N
380	Ovid MEDLINE(R)	Intradermal and serological testing for mites in healthy beagle dogs.	Veterinary Dermatology. 23(3):192-e39, 2012 Jun.	Journal Article	2012	English	Click here for full text options	BACKGROUND: Intradermal testing (IDT) is widely used in veterinary medicine to select allergens for immunotherapy. The recommended concentration for mites is 250 protein nitrogen units (PNU)/mL. It is not known whether healthy dogs responding to this concentration have asymptomatic sensitization or irritation. Furthermore, interbatch and intersupplier variability of allergens has not been fully a…	Y						N	X					Y	Y						N	X					N
381	Ovid MEDLINE(R)	Allergic dermatitis by Dirofilaria repens in a dog: clinical picture and treatment.	Parasitology Research. 111(1):493-6, 2012 Jul.	Case Reports Journal Article Research Support, Non-U.S. Gov't	2012	English	Click here for full text options	Adult stages of Dirofilaria repens (Nematoda, Filarioidea) reside in the subcutaneous tissues of the definitive or occasional host as dogs, other animals, and humans, and it is transmitted by mosquitoes. Canine infections with adults and circulating larvae of D. repens are often considered asymptomatic, although in some cases, the parasite causes subcutaneous nodules, diffused dermatitis, skin le…	N	X					N	X		X			N
382	Ovid MEDLINE(R)	Atopic dermatitis in West Highland white terriers is associated with a 1.3-Mb region on CFA 17.	Immunogenetics. 64(3):209-17, 2012 Mar.	Journal Article Research Support, Non-U.S. Gov't	2012	English	10.1007/s00251-011-0577-x	Canine atopic dermatitis (AD) is an allergic inflammatory skin disease that shares similarities with AD in humans. Canine AD is likely to be an inherited disease in dogs and is common in West Highland white terriers (WHWTs). We performed a genome-wide association study using the Affymetrix Canine SNP V2 array consisting of over 42,800 single nucleotide polymorphisms, on 35 atopic and 25 non-atopi…	Y						N	X					Y	Y						N	X					Y	N						N	X						N
383	Ovid MEDLINE(R)	Effects of pine processionary caterpillar Thaumetopoea pityocampa contact in dogs: 41 cases (2002-2006).	Zoonoses & Public Health. 59(1):35-8, 2012 Feb.	Journal Article	2012	English	Click here for full text options	The pine processionary caterpillar, Thaumetopoea pityocampa, is considered an emerging pine pest in Mediterranean countries, with high medical relevance. In recent years, adverse reactions reports in humans following contact with T. pityocampa have been increasingly reported. Dogs living in pinewood areas are also frequently exposed to the caterpillar. This work consisted on a retrospective study…	N	X					N	X					N
384	Ovid MEDLINE(R)	Transepidermal water loss in healthy and atopic dogs, treated and untreated: a comparative preliminary study.	Veterinary Dermatology. 23(1):41-4, e9-10, 2012 Feb.	Comparative Study Journal Article Research Support, Non-U.S. Gov't	2012	English	Click here for full text options	An impaired skin barrier function is thought to be crucial for allergic sensitization. In humans, the skin barrier is assessed by noninvasive methods, such as the measurement of transepidermal water loss (TEWL). Although limitations have been reported, measurement of TEWL has been demonstrated to be a suitable method to assess barrier function indirectly in dogs. The purposes of this prospective …	N	X					N	X					N
385	Ovid MEDLINE(R)	Comparable efficacy of a topical 0.0584% hydrocortisone aceponate spray and oral ciclosporin in treating canine atopic dermatitis.	Veterinary Dermatology. 23(1):4-10, e1-2, 2012 Feb.	Comparative Study Journal Article Randomized Controlled Trial Research Support, Non-U.S. Gov't	2012	English	Click here for full text options	This study compared the efficacy of a 0.0584% hydrocortisone aceponate (HCA) spray (Cortavance( R); Virbac SA) and ciclosporin (Atopica( R); Novartis Animal Health) in canine atopic dermatitis in a single-blind randomized controlled trial. Dogs received HCA (two sprays/100 cm(2); n=24) or ciclosporin (5 mg/kg; n=21). Canine Atopic Dermatitis Extent and Severity Index (CADESI)-03, pruritus (visual…	N	X					N	X					N
386	Ovid MEDLINE(R)	Effects of Essential Oils and Polyunsaturated Fatty Acids on Canine Skin Equivalents: Skin Lipid Assessment and Morphological Evaluation.	Journal Of Veterinary Medicine. 2013:231526, 2013.	Journal Article	2013	English	Click here for full text options	A canine skin equivalent model has been validated for the assessment of a topical formulation effects. Skin equivalents were developed from freshly isolated cutaneous canine fibroblasts and keratinocytes, after enzymatic digestion of skin samples (n = 8) from different breeds. Fibroblasts were embedded into a collagen type I matrix, and keratinocytes were seeded onto its surface at air-liquid int…	N	X					N	X					N
387	Ovid MEDLINE(R)	Efficacy and safety of oclacitinib for the control of pruritus and associated skin lesions in dogs with canine allergic dermatitis.	Veterinary Dermatology. 24(5):479-e114, 2013 Oct.	Journal Article Randomized Controlled Trial Research Support, Non-U.S. Gov't	2013	English	Click here for full text options	BACKGROUND: Oclacitinib (Apoquel( R) ) inhibits the function of a variety of pro-inflammatory, pro-allergic and pruritogenic cytokines that are dependent on Janus kinase enzyme activity. Oclacitinib selectively inhibits Janus kinase 1. HYPOTHESIS/OBJECTIVES: We aimed to evaluate the safety and efficacy of oclacitinib for the control of pruritus associated with allergic dermatitis in a randomized,…	N	X					N	X					N
388	Ovid MEDLINE(R)	[Rapid specific IgE assay (ImmunoCAP R RAPID) and skin prick test in the diagnosis of allergic disease]. [Japanese]	Arerugi - Japanese Journal of Allergology. 62(12):1631-41, 2013 Dec.	English Abstract Journal Article	2013	japanese	Click here for full text options	BACKGROUND: ImmunoCAP R Rapid is a rapid test kit to measure the allergen-specific IgE to the eight major inhalation allergen (cat, mite, orchard grass, ragweed, wormwood, dog, cockroach, Japan cedar). METHODS: We performed ImmunoCAP R Rapid 83 patients with allergic disease (26 males, 57 females, median aged 43 years, 53 of asthma, 43 of allergic rhinitis) in our allergy center. ImmunoCAP R Rapi…	Y						N	X			X		Y	N	X	X				N		X				N
389	Ovid MEDLINE(R)	The prevalence of dogs with lymphocyte proliferative responses to food allergens in canine allergic dermatitis.	Polish Journal of Veterinary Sciences. 16(4):735-9, 2013.	Journal Article	2013	English	10.2478/pjvs-2013-0104	The aim of the present study was to examine the correlation between the results of lymphocyte proliferative test (LPT) specific to food allergens and allergic skin diseases in dogs. Investigations were performed in 138 dogs with allergic skin diseases diagnosed in a private animal hospital. Of the 138 animals, 97 cases had positive reactions in LPT specific to food allergens. Of these 97 dogs, 67…	Y						N	X					Y	N	X					Y						Y	N						Y							N
390	Ovid MEDLINE(R)	Effects of butorphanol versus dexmedetomidine sedation on intradermal allergen and histamine responses in dogs with atopic dermatitis.	Veterinary Dermatology. 24(6):582-6, e139-40, 2013 Dec.	Journal Article Randomized Controlled Trial Research Support, Non-U.S. Gov't	2013	English	Click here for full text options	BACKGROUND: Sedation is commonly used during intradermal testing (IDT). Morphine and its derivatives have long been avoided because of their histamine-releasing effects. HYPOTHESIS/OBJECTIVES: Butorphanol, an opioid agonist/antagonist, will not adversely affect IDT in dogs. ANIMALS: Ten client-owned dogs diagnosed with atopic dermatitis. METHODS: Dogs were randomized to be sedated with butorphano…	N	X					N	X					N
391	Ovid MEDLINE(R)	Efficacy of dimetinden and hydroxyzine/chlorpheniramine in atopic dogs: a randomised, controlled, double-blinded trial.	Veterinary Record. 173(17):423, 2013 Nov 02.	Journal Article Randomized Controlled Trial Research Support, Non-U.S. Gov't	2013	English	Click here for full text options	Antihistaminic drugs are commonly used as symptomatic therapy of atopic dermatitis in dogs. Unfortunately, their clinical benefit is largely unsubstantiated. In a double-blinded, placebo-controlled, cross-over trial, the influence of dimetinden and of a combination of chlorpheniramine and hydroxyzine on pruritus and lesions was evaluated in 19 dogs. They were treated with either product or a plac…	N	X					N	X					N
392	Ovid MEDLINE(R)	The efficacy of cetirizine hydrochloride on the pruritus of cats with atopic dermatitis: a randomized, double-blind, placebo-controlled, crossover study.	Veterinary Dermatology. 24(6):576-81, e137-8, 2013 Dec.	Journal Article Multicenter Study Randomized Controlled Trial Research Support, Non-U.S. Gov't	2013	English	Click here for full text options	BACKGROUND: Various antihistamines have been used in the management of feline atopic dermatitis, with variable reported benefit. To date, there have been no randomized, double-blind, placebo-controlled, crossover clinical trials on the use of this drug class in cats. HYPOTHESIS/OBJECTIVES: To evaluate the clinical efficacy of cetirizine hydrochloride for the control of pruritus and dermatitis in …	N	X					N	X	X				N
393	Ovid MEDLINE(R)	Our experience with atopy patch tests with aeroallergens.	Acta Medica (Hradec Kralove). 56(1):14-8, 2013.	Controlled Clinical Trial Journal Article	2013	English	Click here for full text options	UNLABELLED: Aim of our study was to evaluate the importance of atopy patch testing with aeroallergens as a diagnostic method in patients suffering from atopic dermatitis. METHOD: The complet dermatological and allergological examinations were performed in 29 patients; 10 men, 19 women with the average age of 27.8 years, min. 17, max. 57 years; with the median SCORAD 24.2 points, s.d. 13.3 points.…	Y						Y						Y	N	X	X				N		X				N
394	Ovid MEDLINE(R)	Atopy patch testing with airborne allergens.	Acta Dermatovenerologica Alpina, Panonica et Adriatica. 22(2):39-42, 2013.	Comparative Study Journal Article	2013	English	Click here for full text options	INTRODUCTION: Atopy patch tests (APT) represent a relatively new diagnostic method for identifying the role of airborne allergens in atopic dermatitis flares. This study evaluates the role of airborne allergens in atopic dermatitis flares in a group of adult patients with atopic dermatitis. The primary goal was to detect the frequency of sensitization to these allergens in a group of patients wit…	Y						Y						Y	N	X	X				N		X				N
395	Ovid MEDLINE(R)	Immunoproteomic characterization of Ambrosia artemisiifolia pollen allergens in canine atopic dermatitis.	Veterinary Immunology & Immunopathology. 155(1-2):38-47, 2013 Sep 01.	Journal Article Research Support, Non-U.S. Gov't	2013	English	10.1016/j.vetimm.2013.06.005	Canine atopic dermatitis (CAD) is an immune system disorder that affects 10-15% of the canine population. Short ragweed (Ambrosia artemisiifolia) pollen represents one of the major seasonal sources of allergenic pollen proteins in Europe, particularly in the Pannonian valley of the Balkan region. In Serbia, about 66% of atopic dogs showed a positive intradermal skin test with its pollen extract, …	Y						Y						Y	Y						Y						Y	Y						Y							Y
396	Ovid MEDLINE(R)	Risk factors for developing atopic dermatitis.	Danish Medical Journal. 60(7):B4687, 2013 Jul.	Journal Article	2013	English	Click here for full text options	The aim of this thesis was to investigate possible risk factors affecting the development of AD. AD is a frequent disease among children and has a substantial impact on the lives of both the child and its family. A better understanding of the disease would enable better treatment, prevention and information to the families involved. Previous risk factor studies have been hampered by an unsuitable…	Y						N	X					Y	N	X	X				N		X				N
397	Ovid MEDLINE(R)	Cross-reaction and co-sensitization among related and unrelated allergens in canine intradermal tests.	Veterinary Dermatology. 24(4):422-7, e91-2, 2013 Aug.	Journal Article	2013	English	10.1111/vde.12044	BACKGROUND: Intradermal tests are used to identify allergens for avoidance and immunotherapy in atopic dogs. HYPOTHESIS/OBJECTIVES: To evaluate cross-reaction or co-sensitization among 53 intradermal test allergens. ANIMALS: Six hundred and fifty-one client-owned dogs with atopic dermatitis. METHODS: Intradermal tests were performed with 53 house dust/storage mite, epidermal, insect, tree, weed a…	Y						Y						Y	Y						Y						Y	Y						Y							Y
398	Ovid MEDLINE(R)	Altered mRNA and protein expression of filaggrin in the skin of a canine animal model for atopic dermatitis.	Veterinary Dermatology. 24(3):329-36, e73, 2013 Jun.	Journal Article Research Support, Non-U.S. Gov't	2013	English	Click here for full text options	BACKGROUND: Filaggrin is a structural protein that has attracted increasing interest over the past decade for its role in the pathogenesis of human atopic dermatitis (AD). Null mutations in its sequence are considered risk factors in the development of AD. HYPOTHESIS/OBJECTIVES: To investigate canine filaggrin mRNA and protein expression in the skin of atopic beagles with experimentally induced A…	Y						N	X					Y	N	X					Y						N
399	Ovid MEDLINE(R)	Efficacy of a new topical cyclosporine A formulation in the treatment of atopic dermatitis in dogs.	Veterinary Journal. 197(2):280-5, 2013 Aug.	Journal Article Multicenter Study Randomized Controlled Trial	2013	English	Click here for full text options	Topical treatment with cyclosporine A (CsA) has recently become possible with the development of novel nanotechnology pharmaceutical formulations of CsA able to penetrate through the epidermis providing good absorption and dermal action. The aim of this multicentre, blinded, parallel, randomized, placebo controlled trial was to evaluate the efficacy of a new topical CsA formulation in dogs with a…	N	X					N	X					N
400	Ovid MEDLINE(R)	Antifungal agent susceptibilities and interpretation of Malassezia pachydermatis and Candida parapsilosis isolated from dogs with and without seborrheic dermatitis skin.	Medical Mycology. 51(7):721-30, 2013 Oct.	Journal Article Research Support, Non-U.S. Gov't	2013	English	Click here for full text options	Malassezia pachydermatis and Candida parapsilosis are recognized as commensal yeasts on the skin of healthy dogs but also causative agents of eborrheic dermatitis, especially in atopic dogs. We determined and compared the susceptibility levels of yeasts isolated from dogs with and without seborrheic dermatitis (SD) using the disk diffusion method (DD) for itraconazole (ITZ), ketoconazole (KTZ), n…	N	X					N	X					N
401	Ovid MEDLINE(R)	The efficacy of n-butyl-cyanoacrylate tissue adhesive for closure of canine laparoscopic ovariectomy port site incisions.	Journal of Small Animal Practice. 54(4):190-4, 2013 Apr.	Journal Article	2013	English	Click here for full text options	OBJECTIVES: To evaluate the efficacy of n-butyl-cyanoacrylate used to close port site skin incisions following canine laparoscopic ovariectomy and to assess owner attitudes to surgical adhesive. METHODS: The case records of dogs undergoing laparoscopic ovariectomy at a single centre during a 42-month period were examined. Dogs with incisions closed with n-butyl-cyanoacrylate were included. Cases …	N	X					N	X					N
402	Ovid MEDLINE(R)	Comparison of three different sampling methods for canine skin lipids.	Veterinary Dermatology. 24(2):233-e51, 2013 Apr.	Comparative Study Journal Article	2013	English	Click here for full text options	BACKGROUND: Epidermal lipids are of major interest in dermatological research, especially in canine atopic dermatitis. Owing to the existence of several sampling methods, the interpretation of study results is often complicated. OBJECTIVES: This study aimed to compare three different sampling methods and to establish a minimally invasive method for collecting canine epidermal lipids. ANIMALS AND …	N	X					Y						Y	N	X					Y						N
403	Ovid MEDLINE(R)	Canine atopic dermatitis - what have we learned?. [Review]	Veterinary Record. 172(8):201-7, 2013 Feb 23.	Journal Article Review	2013	English	Click here for full text options	Canine atopic dermatitis is a complex multifactorial disease. Here, Tim Nuttall, Maarja Uri and Richard Halliwell, representing three generations of veterinary dermatologists, describe the research underpinning our understanding of the condition and highlight its relevance to clinical practice.	N			X			N			X			N
404	Ovid MEDLINE(R)	Evidence-based guidelines for anti-allergic drug withdrawal times before allergen-specific intradermal and IgE serological tests in dogs. [Review]	Veterinary Dermatology. 24(2):225-e49, 2013 Apr.	Journal Article Review	2013	English	Click here for full text options	BACKGROUND: Anti-allergic drugs (e.g. antihistamines, glucocorticoids and ciclosporin) are often administered to dogs with atopic dermatitis to relieve pruritus and skin lesions. Allergen-specific intradermal tests (IDT) and allergen-specific IgE serological (ASIS) tests are used to characterize the allergens to which dogs are hypersensitive. Anti-allergic drugs have the potential to influence th…	N	X					N			X			N
405	Ovid MEDLINE(R)	The genomics revolution: will canine atopic dermatitis be predictable and preventable?. [Review]	Veterinary Dermatology. 24(1):10-8.e3-4, 2013 Feb.	Journal Article Review	2013	English	Click here for full text options	BACKGROUND: Heritability studies suggest that atopic dermatitis (AD) involves multiple genes and interactions with environmental factors. Advances in genomics have given us powerful techniques to study the genetics of AD. OBJECTIVE: To review the application of these techniques to canine AD. RESULTS: Candidate genes can be studied using quantitative PCR and genomic techniques, but these are hypot…	N			X			N	X		X			N
406	Ovid MEDLINE(R)	Plasma and skin vitamin E concentrations in canine atopic dermatitis.	Veterinary Quarterly. 33(1):2-6, 2013.	Journal Article Research Support, Non-U.S. Gov't	2013	English	Click here for full text options	BACKGROUND: Altered homeostasis of vitamin E has been demonstrated in human atopic dermatitis. Data on plasma and skin vitamin E concentrations in canine atopic dermatitis (CAD) are not available. OBJECTIVE: To determine vitamin E concentrations in plasma and skin of atopic dogs. ANIMALS AND METHODS: Vitamin E concentrations in plasma and full-thickness skin biopsies of 15 atopic dogs were relate…	Y						Y						Y	N	X					N	X					N
407	Ovid MEDLINE(R)	Cyclosporine in veterinary dermatology. [Review]	Veterinary Clinics of North America - Small Animal Practice. 43(1):153-71, 2013 Jan.	Journal Article Review	2013	English	Click here for full text options	Cyclosporine is an immunomodulatory medication that is efficacious and approved for atopic dermatitis in dogs and allergic dermatitis in cats; it has also been used to successfully manage a variety of immune-mediated dermatoses in dogs and cats. This article reviews the use of cyclosporine in veterinary dermatology including its mechanism of action, pharmacokinetics, drug interactions, side effec…	N	X		X			N	X		X			N
408	Ovid MEDLINE(R)	The skin prick test - European standards.	Clinical and Translational Allergy. 3(1):3, 2013 Feb 01.	Journal Article	2013	English	Click here for full text options	Skin prick testing is an essential test procedure to confirm sensitization in IgE-mediated allergic disease in subjects with rhinoconjunctivitis, asthma, urticaria, anapylaxis, atopic eczema and food and drug allergy. This manuscript reviews the available evidence including Medline and Embase searches, abstracts of international allergy meetings and position papers from the world allergy literatu…	Y						Y						Y	N	X	X				N	X	X				N
409	Ovid MEDLINE(R)	Prevalence of and risk factors for increased serum levels of allergen-specific IgE in a population of Norwegian dogs.	Acta Veterinaria Scandinavica. 56:81, 2014 Dec 05.	Journal Article	2014	English	10.1186/s13028-014-0081-z	BACKGROUND: The importance of different allergens in association with IgE production and canine atopic dermatitis (CAD) has been poorly studied and few studies exist on factors influencing allergen-specific IgE antibodies in serum. The aim of this cross-sectional study was to investigate the prevalence of elevated IgE levels to different environmental allergens in Norwegian dogs with a suspicion …	Y						Y						Y	Y						Y						Y	Y						Y							Y
410	Ovid MEDLINE(R)	A case of methicillin-resistant Staphylococcus pseudintermedius (MRSP) pyoderma in a Labrador retriever dog.	Canadian Veterinary Journal. 55(11):1100-1, 2014 Nov.	Case Reports Journal Article	2014	English	Click here for full text options	An 8-year-old, neutered male Labrador retriever dog with generalized pruritis had a history of recurring atopic dermatitis and superficial pyoderma. Cocci and yeast were found on cytology and methicillin-resistant Staphylococcus pseudintermedius was cultured. A regimen of marbofloxacin, dexamethasone, ketoconazole, and cyclosporine in addition to bathing with 2% chlorhexidine shampoo resulted in …	N	X					N	X		X			N
411	Ovid MEDLINE(R)	[Immunoallergic skin manifestations associated with new pets: three cases]. [French]	Annales de Dermatologie et de Venereologie. 141(10):588-92, 2014 Oct.	Case Reports English Abstract Journal Article	2014	French	Click here for full text options	BACKGROUND: The number of household pets increased greatly during the twentieth century, with numbers of new pets (NP, i.e. any pets other than cats and dogs) rising especially sharply over the last decade. PATIENTS AND METHODS: We first of all report the case of a female patient with eczema lesions on areas skin coming into contact with a ferret, with removal of the animal resulting in wound hea…	Y						N	X					Y	N	X	X				N		X				N
412	Ovid MEDLINE(R)	Assessment of the relationship between transepidermal water loss (TEWL) and severity of clinical signs (CADESI-03) in atopic dogs.	Veterinary Dermatology. 25(6):503-6, e83, 2014 Dec.	Clinical Trial Comparative Study Journal Article	2014	English	Click here for full text options	BACKGROUND: Atopic dermatitis (AD) is a common allergic skin disease of dogs. Objective documentation of disease severity is important for the assessment of responses to therapeutic interventions. One common means of assessing the severity of clinical signs is the Canine Atopic Dermatitis Extent and Severity Index (CADESI)-03. In addition, studies of the biophysical parameters of the skin suggest…	N	X					N	X					N
413	Ovid MEDLINE(R)	Comparison of the results of intradermal test reactivity and serum allergen-specific IgE measurement for Malassezia pachydermatis in atopic dogs.	Veterinary Dermatology. 25(6):507-11, e84-5, 2014 Dec.	Comparative Study Evaluation Study Journal Article	2014	English	10.1111/vde.12159	BACKGROUND: Malassezia pachydermatis is part of the normal flora of canine skin. Malassezia hypersensitivity is recognized as a trigger for clinical signs of atopic dermatitis (AD) in some dogs. Determinations of Malassezia hypersensitivity are often made with intradermal testing (IDT), which may have limited availability in a first-opinion veterinary practice. HYPOTHESIS/OBJECTIVES: The purpose …	Y						Y						Y	Y						Y						Y	N						N	X						N
414	Ovid MEDLINE(R)	Efficacy of oclacitinib (Apoquel R) compared with prednisolone for the control of pruritus and clinical signs associated with allergic dermatitis in client-owned dogs in Australia.	Veterinary Dermatology. 25(6):512-8, e86, 2014 Dec.	Comparative Study Journal Article Randomized Controlled Trial Research Support, Non-U.S. Gov't	2014	English	Click here for full text options	BACKGROUND: Oral glucocorticoids are widely used to reduce pruritus and dermatitis associated with allergic dermatitis. Data suggest that oclacitinib, a Janus kinase inhibitor, is a safe and effective alternative. HYPOTHESIS/OBJECTIVES: To evaluate the efficacy and safety of oclacitinib compared with prednisolone for the control of pruritus associated with allergic dermatitis in a single-masked, …	N	X					N	X					N
415	Ovid MEDLINE(R)	Gene expression in the skin of dogs sensitized to the house dust mite Dermatophagoides farinae.	G3 Genes - Genomes - Genetics. 4(10):1787-95, 2014 Aug 05.	Journal Article Research Support, Non-U.S. Gov't	2014	English	Click here for full text options	Atopic dermatitis is a multifactorial allergic skin disease in humans and dogs. Genetic predisposition, immunologic hyperreactivity, a defective skin barrier, and environmental factors play a role in its pathogenesis. The aim of this study was to analyze gene expression in the skin of dogs sensitized to house dust mite antigens. Skin biopsy samples were collected from six sensitized and six nonse…	Y						Y						Y	Y						N	X					N
416	Ovid MEDLINE(R)	Canine epidermal lipid sampling by skin scrub revealed variations between different body sites and normal and atopic dogs.	BMC Veterinary Research [Electronic Resource]. 10:152, 2014 Jul 10.	Journal Article Research Support, Non-U.S. Gov't	2014	English	Click here for full text options	BACKGROUND: Previously, we evaluated a minimally invasive epidermal lipid sampling method called skin scrub, which achieved reproducible and comparable results to skin scraping. The present study aimed at investigating regional variations in canine epidermal lipid composition using the skin scrub technique and its suitability for collecting skin lipids in dogs suffering from certain skin diseases…	N	X					Y						Y	N	X					N	X					N
417	Ovid MEDLINE(R)	Fluoxetine (SSRI) treatment of canine atopic dermatitis: a randomized, double-blind, placebo-controlled, crossover trial.	Polish Journal of Veterinary Sciences. 17(2):371-3, 2014.	Journal Article Randomized Controlled Trial	2014	English	Click here for full text options	This study investigated effects of a fluoxetine (selective serotonin reuptake inhibitors; SSRI, 1 mg/kg) on pruritus in canine atopic dermatitis (CAD). After 4-weeks of base-line observation, 8 dogs with CAD entered a 2-months randomized, double-blind, placebo-controlled, crossover trial comparing fluoxetine with placebo. Clinical efficacy was evaluated using a Canine Atopic Dermatitis Extent and…	N	X					N	X					N
418	Ovid MEDLINE(R)	Assessment of serum levels of allergen-specific immunoglobulin E in different seasons and breeds in healthy horses.	Polish Journal of Veterinary Sciences. 17(2):331-7, 2014.	Journal Article	2014	English	Click here for full text options	The present study was designed to asses specific IgE towards environment allergens in 42 healthy horses. Determination of this immunoglobulin in serum serve as diagnostic tools in allergic diseases to improve efficacy of the treatment and proper allergen selection to specific immunotherapy. Serum levels of allergen specific IgE were measured with equine monoclonal antibody, using 15 individual an…	N		X				N	X	X				N
419	Ovid MEDLINE(R)	Sensitization rates of causative allergens for dogs with atopic dermatitis: detection of canine allergen-specific IgE.	Journal of Veterinary Science. 15(4):545-50, 2014 Dec.	Journal Article Research Support, Non-U.S. Gov't	2014	English	10.4142/jvs.2014.15.4.545	Allergen-specific IgE serology tests became commercially available in the 1980s. Since then these tests have been widely used to diagnose and treat allergic skin diseases. However, the relationship between a positive reaction and disease occurrence has been controversial. The purpose of this study was to evaluate allergens using a serologic allergy test in dogs with atopic dermatitis (AD). Dogs c…	Y						Y						Y	Y						Y						Y	Y						N	X						Y
420	Ovid MEDLINE(R)	Efficacy and safety of rush immunotherapy with alum-precipitated allergens in canine atopic dermatitis.	Tierarztliche Praxis. Ausgabe K, Kleintiere/Heimtiere. 42(3):167-73, 2014.	Journal Article	2014	English	Click here for full text options	OBJECTIVES: Canine atopic dermatitis is a very common disease in small animal practice. Its only specific treatment is allergen immunotherapy. In rush-immunotherapy (RIT) increasing doses of allergen extract are injected subcutaneously in short intervals. Maintenance doses are achieved within one day compared to weeks or months with conventional immunotherapy. The aim of this study was to evaluat…	N	X					N	X					N
421	Ovid MEDLINE(R)	[Frequency of sensitization to animals in a tropical area]. [Spanish]	Revista Alergia Mexico. 61(2):81-9, 2014 Apr-Jun.	English Abstract Journal Article	2014	Spanish	Click here for full text options	BACKGROUND: Pet avoidance is commonly recommended to allergic patients, even if an IgE-mediated sensitization has not been demonstrated. This management is difficult to accomplish by patients with emotional attachment to their pets and the effectiveness is controversial. OBJECTIVE: To assess the sensitization to different animals among patients with asthma, rhinitis, conjunctivitis and/or dermati…	N	X					Y						Y	N	X	X				N		X				N
422	Ovid MEDLINE(R)	Clinical efficacy of low-level laser therapy on localized canine atopic dermatitis severity score and localized pruritic visual analog score in pedal pruritus due to canine atopic dermatitis.	Veterinary Dermatology. 25(5):464-e74, 2014 Oct.	Journal Article Research Support, Non-U.S. Gov't	2014	English	Click here for full text options	BACKGROUND: Canine atopic dermatitis is a genetically predisposed inflammatory skin disease often requiring multimodal treatment. There is a need to find further low-risk adjunctive therapies. HYPOTHESIS/OBJECTIVES: To evaluate the localized effect of low-level laser therapy (LLLT) on the paws of dogs with atopic dermatitis using a localized canine atopic dermatitis severity score (LCADSS) and ow…	N	X					N	X					N
423	Ovid MEDLINE(R)	Food-specific serum IgE and IgG reactivity in dogs with and without skin disease: lack of correlation between laboratories.	Veterinary Dermatology. 25(5):447-e70, 2014 Oct.	Journal Article Research Support, Non-U.S. Gov't	2014	English	Click here for full text options	BACKGROUND: Despite conflicting data on their utility and no reports on interlaboratory reproducibility, serum food-specific antibodies are commonly assayed in first-opinion canine practice. HYPOTHESIS/OBJECTIVES: To determine both the variability of test results between two laboratories and the frequencies and magnitudes of food reactivity in dogs of different disease status. ANIMALS: Sera were …	N	X					N	X					N
424	Ovid MEDLINE(R)	Use of activity monitors for assessment of pruritus in an acute model of canine atopic dermatitis.	Veterinary Dermatology. 25(5):441-e69, 2014 Oct.	Journal Article Research Support, Non-U.S. Gov't	2014	English	Click here for full text options	BACKGROUND: We developed a canine model of acute atopic dermatitis to evaluate the potential of compounds to treat pruritus and skin lesions induced in Dermatophagoides farinae (Df)-sensitized dogs. HYPOTHESIS/OBJECTIVES: The aim was to investigate the effectiveness of long-term recording activity monitors to assess pruritus induced by allergen challenges. ANIMALS: Thirty-two Df-sensitized labora…	N	X					N	X					N
425	Ovid MEDLINE(R)	Staphylococcus pseudintermedius infection associated with nodular skin lesions and systemic inflammatory response syndrome in a dog.	Canadian Veterinary Journal. 55(5):480-3, 2014 May.	Case Reports Journal Article Research Support, Non-U.S. Gov't	2014	English	Click here for full text options	A 10-year-old Pekingese dog with atopic dermatitis was referred due to pyrexia, multiple skin nodules, anorexia, and depression. The dog was diagnosed as having systemic inflammatory response syndrome (SIRS) induced by bacterial dermatitis. This case presents diagnosis and treatment of SIRS with staphylococcal skin infection in a dog that was immunosuppressed due to long-term use of corticosteroi…	N	X					N	X					N
426	Ovid MEDLINE(R)	Emergence and maintenance of multidrug-resistant Escherichia coli of canine origin harbouring a blaCMY-2-IncI1/ST65 plasmid and topoisomerase mutations.	Journal of Antimicrobial Chemotherapy. 69(8):2076-80, 2014 Aug.	Journal Article Research Support, Non-U.S. Gov't	2014	English	Click here for full text options	OBJECTIVES: To characterize the mechanisms implicated in fluoroquinolone (FQ) and expanded-spectrum cephalosporin (ESC) resistance in three clinical and seven faecal multidrug-resistant (MDR; resistant to at least three antimicrobial classes) Escherichia coli isolates from a dog with atopic dermatitis, also suffering from recurrent otitis, that had already been exposed to prolonged antimicrobial …	N	X					N	X					N
427	Ovid MEDLINE(R)	Papular dermatitis due to Leishmania infantum infection in seventeen dogs: diagnostic features, extent of the infection and treatment outcome.	Parasites & Vectors [Electronic Resource]. 7:120, 2014 Mar 24.	Journal Article Research Support, Non-U.S. Gov't	2014	English	Click here for full text options	UNLABELLED: BACKGROUND: This study describes immunological responses, diagnostic features, follow up and treatment outcomes from seventeen dogs with papular dermatitis due to Leishmania infection diagnosed by cytology or real time-PCR. METHODS: Specific Leishmania humoral and cellular immune responses were evaluated by means of an immunofluorescence antibody test in all cases and a delayed-type h…	N	X					N	X					N
428	Ovid MEDLINE(R)	Relationship of body weight to maintenance cyclosporine a dose in canine atopic dermatitis.	Journal of the American Animal Hospital Association. 50(3):174-80, 2014 May-Jun.	Journal Article	2014	English	Click here for full text options	Cyclosporine A (CsA) is a commonly prescribed and effective therapy for canine atopic dermatitis. The purpose of this study was to investigate the potential relationship between patient body weight and CsA dosing. Seventy-seven cases of canine atopic dermatitis managed between 2000 and 2011 were evaluated retrospectively. Duration of CsA therapy was at least 16 wk. Groups analyzed included the st…	N	X					N	X					N
429	Ovid MEDLINE(R)	Atopic phenotypes identified with latent class analyses at age 2 years.	Journal of Allergy & Clinical Immunology. 134(3):722-727.e2, 2014 Sep.	Journal Article Research Support, N.I.H., Extramural	2014	English	Click here for full text options	BACKGROUND: Atopic sensitization (ie, atopy) is the most commonly reported risk factor for asthma. Recent studies have begun to suggest that atopy, as conventionally defined, might be an umbrella term that obfuscates more specific allergic disease types. OBJECTIVE: We sought to determine whether distinct and meaningful atopic phenotypes exist within a racially diverse birth cohort using 10 allerg…	N		X				N	X					N
430	Ovid MEDLINE(R)	Agreement between allergen-specific IgE assays and ensuing immunotherapy recommendations from four commercial laboratories in the USA.	Veterinary Dermatology. 25(1):15-e6, 2014 Feb.	Journal Article Research Support, Non-U.S. Gov't	2014	English	10.1111/vde.12104	BACKGROUND: Canine allergen-specific IgE assays in the USA are not subjected to an independent laboratory reliability monitoring programme. HYPOTHESIS/OBJECTIVES: The aim of this study was to evaluate the agreement of diagnostic results and treatment recommendations of four serum IgE assays commercially available in the USA. METHODS: Replicate serum samples from 10 atopic dogs were submitted to e…	Y						Y						Y	Y						Y						Y	Y						N	X						Y
431	Ovid MEDLINE(R)	In vitro susceptibility of Malassezia pachydermatis isolates from canine skin with atopic dermatitis to ketoconazole and itraconazole in East Asia.	Journal of Veterinary Medical Science. 76(4):579-81, 2014 Apr.	Journal Article Research Support, Non-U.S. Gov't	2014	English		Topical or oral azole antifungals are commonly used in canine atopic dermatitis (AD), as the lipophilic yeast Malassezia pachydermatis exacerbates canine AD. To examine whether canine AD lesions harbor azole-resistant M. pachydermatis isolates in East Asia, we investigated the in vitro susceptibility of M. pachydermatis isolates to ketoconazole (KTZ) and itraconazole (ITZ) obtained from AD lesion…	N	X					N	X					N
432	Ovid MEDLINE(R)	Eczema and sensitization to common allergens in the United States: a multiethnic, population-based study.	Pediatric Dermatology. 31(1):21-6, 2014 Jan-Feb.	Journal Article Research Support, Non-U.S. Gov't	2014	English	Click here for full text options	The relationship between food and environmental allergens in contributing to eczema risk is unclear on a multiethnic population level. Our purpose was to determine whether sensitization to specific dietary and environmental allergens as measured according to higher specific immunoglobulin E (IgE) levels is associated with eczema risk in children. National Health and Nutrition Examination Survey p…	N		X				N	X	X				N
433	Ovid MEDLINE(R)	Toxocarosis and putative DRESS syndrome in an oncological patient: a case report.	Wiener Klinische Wochenschrift. 126 Suppl 1:S51-5, 2014 Apr.	Case Reports Journal Article	2014	English	Click here for full text options	Toxocarosis is a parasitic infection caused by Toxocara canis or Toxocara cati. Their definite hosts are the domestic dog and cat, where their adult forms live within the lumen of the small intestine. In humans, infective larvae hatch after ingestion of eggs, but the juvenile stages fail to develop into mature adult worms. Instead, they migrate through the body with the potential to affect virtua…	N		X				N	X	X				N
434	Ovid MEDLINE(R)	Optimization of an immunohistochemical method to assess distribution of tight junction proteins in canine epidermis and adnexae.	Journal of Comparative Pathology. 150(1):35-46, 2014 Jan.	Journal Article	2014	English	Click here for full text options	Epidermal tight junctions (TJs) have been well characterized in human medicine. Abnormality of these structures is involved in skin diseases such as atopic dermatitis. There is little information about the expression and distribution of TJ proteins in the canine skin. The aim of this study was to develop an optimal immunohistochemical method for assessment of the expression of TJ proteins in the …	Y						N	X					Y	Y						N	X					N
435	Ovid MEDLINE(R)	Associations between selected allergens, phthalates, nicotine, polycyclic aromatic hydrocarbons, and bedroom ventilation and clinically confirmed asthma, rhinoconjunctivitis, and atopic dermatitis in preschool children.	Indoor Air. 24(2):136-47, 2014 Apr.	Journal Article Research Support, Non-U.S. Gov't	2014	English	Click here for full text options	Previous studies, often using data from questionnaires, have reported associations between various characteristics of indoor environments and allergic disease. The aim of this study has been to investigate possible associations between objectively assessed indoor environmental factors and clinically confirmed asthma, rhinoconjunctivitis, and atopic dermatitis. The study is a cross-sectional case-…	N		X				N		X				N
436	Ovid MEDLINE(R)	Canine atopic dermatitis: detailed guidelines for diagnosis and allergen identification. [Review]	BMC Veterinary Research [Electronic Resource]. 11:196, 2015 Aug 11.	Journal Article Review	2015	English	Click here for full text options	BACKGROUND: Canine atopic dermatitis (AD) is a common, genetically predisposed, inflammatory and pruritic skin disease. The variation in clinical presentations, due to genetic factors, extent of the lesions, stage of the disease, secondary infections, as well as resemblance to other non-atopic related skin diseases, can complicate a diagnosis of canine AD. A sub-group of the International Committ…	N			X			N			X			N
437	Ovid MEDLINE(R)	Pet avoidance in allergy cases: Is it possible to implement it?.	Biomedica. 35(3):357-62, 2015 Jul-Sep.	Journal Article Research Support, Non-U.S. Gov't	2015	English	Click here for full text options	INTRODUCTION: Among allergic patients, pet avoidance is commonly recommended. It is difficult for patients to accomplish this because of their emotional attachment to the pets, and its effectiveness is controversial. OBJECTIVE: To explore the applicability and effectiveness of pet avoidance measures among sensitized patients. MATERIALS AND METHODS: We evaluated 288 patients with asthma, rhinitis,…	N		X				N			X			N
438	Ovid MEDLINE(R)	Pine processionary caterpillar, Thaumetopoea pityocampa Denis and Schiffermuller, 1775 contact as a health risk for dogs. [Review]	Annals of Parasitology. 61(3):159-63, 2015.	Journal Article Review	2015	English	Click here for full text options	Pine processionary, Thaumetopoea pityocampa Denis and Schiffermuller, 1775 is a moth that belongs to the order of insects Lepidoptera, and family Notodontidae. The larvae of pine processionary moth are the main pest of pines all over the world, but mainly in Mediterranean region. The contact with pine processionary caterpillar (lepidopterism) can produce a strong inflammatory reaction on skin and…	N			X			N	X		X			N
439	Ovid MEDLINE(R)	A Double-Blind, Placebo Controlled-Trial of a Probiotic Strain Lactobacillus sakei Probio-65 for the Prevention of Canine Atopic Dermatitis.	Journal of Microbiology & Biotechnology. 25(11):1966-9, 2015 Nov.	Journal Article Research Support, Non-U.S. Gov't	2015	English	Click here for full text options	Canine atopic dermatitis (CAD) is a ubiquitous, chronic inflammatory skin disorder prevalent in dogs, which results in production of abnormal levels of IgE antibodies in reciprocation to an allergen challenge. In this study, administration of the probiotic strain Lactobacillus sakei probio-65 for 2 months significantly reduced the disease severity index in experimental dogs diagnosed with CAD. In…	N	X					N	X					N
440	Ovid MEDLINE(R)	IgE antibodies and urinary trimethylarsine oxide accounted for 1-7% population attributable risks for eczema in adults: USA NHANES 2005-2006.	Environmental Science & Pollution Research. 22(23):18404-9, 2015 Dec.	Journal Article	2015	English	Click here for full text options	Population attributable risks from serum IgE and dust miteallergen concentrations and environmental chemicals for eczema are unclear. Therefore, it was aimed to examine serum IgE and allergen concentrations and environmental chemicals for eczema in adults and to calculate population attributable risks in a national and population-based setting. Data retrieved from the National Health and Nutritio…	N	X					N	X	X				N
441	Ovid MEDLINE(R)	Contact dermatitis: a comparative and translational review of the literature. [Review]	Veterinary Dermatology. 26(5):314-27, e66-7, 2015 Oct.	Comparative Study Journal Article Review	2015	English	Click here for full text options	BACKGROUND: Contact dermatitis (CD) is an inflammatory skin condition induced by direct contact with a specific chemical. Irritant CD (ICD) is a nonspecific inflammatory cutaneous reaction to an irritating agent. Allergic CD (ACD) is an immune-mediated antigen-specific skin reaction to an allergenic chemical. OBJECTIVES AND METHODS: The biomedical literature (human, basic science, veterinary) was…	N			X			N	X		X			N
442	Ovid MEDLINE(R)	Comparison of IgE test results with intradermal skin tests for dust mites and storage mites in atopic dogs.	Polish Journal of Veterinary Sciences. 18(2):351-6, 2015.	Journal Article	2015	English	10.1515/pjvs-2015-0045	Atopic dermatitis is one of the most frequent allergic diseases in dogs. There are many methods of treating its symptoms but specific immunotherapy has recently gained high popularity. Before the application of specific immunotherapy, it is necessary to identify the allergens provoking the reaction of hypersensitivity in the selected animal. This raises a question about the method of allergen ide…	Y						Y						Y	Y						Y						Y	Y						Y							Y
443	Ovid MEDLINE(R)	Complementary effect of oral administration of Lactobacillus paracasei K71 on canine atopic dermatitis.	Veterinary Dermatology. 26(5):350-3, e74-5, 2015 Oct.	Journal Article Multicenter Study Randomized Controlled Trial Research Support, Non-U.S. Gov't	2015	English	Click here for full text options	BACKGROUND: Atopic dermatitis is a common skin disease encountered in dogs. Glucocorticoids are commonly recommended for symptomatic therapy and well-tolerated adjunctive therapies may help to reduce the necessary dose and associated risks of chronic glucocorticoid use. HYPOTHESIS/OBJECTIVES: The purpose of this study was to evaluate the complementary efficacy of oral administration of Lactobacil…	N	X					N	X					N
444	Ovid MEDLINE(R)	Proficiency monitoring of monoclonal antibody cocktail-based enzyme-linked immunosorbent assay for detection of allergen-specific immunoglobulin E in dogs.	Journal of Veterinary Diagnostic Investigation. 27(4):461-9, 2015 Jul.	Journal Article Research Support, Non-U.S. Gov't Validation Study	2015	English	10.1177/1040638715587547	The purpose of our study was to document the continued comparative proficiency of different laboratories that perform a monoclonal antibody-based enzyme-linked immunosorbent assay (macELISA) for detection of allergen-specific immunoglobulin (Ig)E in dogs. Replicate samples of 18 different sera pools were independently evaluated in a single blinded fashion by each of 16 different operators functio…	Y						Y						Y	Y						Y						Y	Y						N	X						N
445	Ovid MEDLINE(R)	Oclacitinib in feline nonflea-, nonfood-induced hypersensitivity dermatitis: results of a small prospective pilot study of client-owned cats.	Veterinary Dermatology. 26(4):235-e52, 2015 Aug.	Journal Article	2015	English	Click here for full text options	BACKGROUND: Oclacitinib is a Janus kinase inhibitor that decreases pruritus and lesions in allergic dogs. In cats, it is able to inhibit interleukin-31-induced pruritus; no information is available on its clinical effectiveness. HYPOTHESIS/OBJECTIVES: To evaluate the efficacy, ease of administration and tolerability of oclacitinib in feline nonflea-, nonfood-induced hypersensitivity dermatitis. M…	N	X					N	X	X				N
446	Ovid MEDLINE(R)	Review: The role of antibodies, autoantigens and food allergens in canine atopic dermatitis. [Review]	Veterinary Dermatology. 26(2):115-e30, 2015 Apr.	Journal Article Research Support, Non-U.S. Gov't Review	2015	English	Click here for full text options	BACKGROUND: Canine atopic dermatitis (AD) is considered to be an immunoglobulin E (IgE)-mediated hypersensitivity response to environmental allergens. The role of other antibody isotypes and nonenvironmental allergens in disease pathogenesis remains unclear. OBJECTIVES: The objective of this review is to provide an update on advances in the understanding of the relevance of specific antibody isot…	N			X			N			X			N
447	Ovid MEDLINE(R)	Food allergens inducing a lymphocyte-mediated immunological reaction in canine atopic-like dermatitis.	Journal of Veterinary Medical Science. 77(2):251-4, 2015 Feb.	Journal Article	2015	English	Click here for full text options	Canine atopic-like dermatitis (ALD) is suspected to be associated with food allergies, particularly those mediated by lymphocytes. In this study, 54 cases were included as ALD dogs, based on the negative IgE test results. In the dogs, the percentage of activated cells in helper-T lymphocytes was measured by flow cytometry using cultured peripheral lymphocytes under food allergen stimulation. We o…	N	X					N	X					N
448	Ovid MEDLINE(R)	Review: Clinical and histological manifestations of canine atopic dermatitis. [Review]	Veterinary Dermatology. 26(2):79-e24, 2015 Apr.	Journal Article Review	2015	English	Click here for full text options	BACKGROUND: Many studies focusing on clinical and histological signs of canine atopic dermatitis (AD) have been published since its early descriptions decades ago. Findings of these studies contributed to our current knowledge about the disease pathogenesis and allowed establishment of diagnostic criteria used by clinicians and researchers. OBJECTIVES: This review serves as an update on the clini…	N			X			N			X			N
449	Ovid MEDLINE(R)	Tight junction proteins in the canine epidermis: a pilot study on their distribution in normal and in high IgE-producing canines.	Canadian Journal of Veterinary Research. 79(1):46-51, 2015 Jan.	Journal Article	2015	English	Proteínas de unión estrecha en la epidermis canina: un estudio piloto sobre su distribución en caninos normales y en caninos con alta producción de IgE - PubMed (lookproxy.com)	Epidermal tight junctions (TJ) have been well-described in human medicine and are involved in many skin diseases such as atopic dermatitis (AD). In dogs, there are no data regarding the implication of TJ in skin diseases including canine AD. The aim of this study was to compare the expression and the distribution of ZO-1, occludin and claudin-1 in the epidermis of healthy and atopic dogs. Skin bi…	Y						N	X					Y	Y						N	X					Y	N						N	X						N
450	Ovid MEDLINE(R)	Canine atopic dermatitis diagnostic criteria: evaluation of four sets of published criteria among veterinary students.	Journal of Veterinary Medical Education. 42(1):79-84, 2015 Spring.	Comparative Study Journal Article	2015	English	Click here for full text options	Canine atopic dermatitis (cAD) is a major teaching point as its diagnosis and treatment are difficult. During 11 weeks, 140 dogs and students (third, fourth, and fifth years) were recruited and paired. One of the four lists of diagnostic criteria was randomly attributed to each student. Concordance results, calculated with Cohen's kappa, ranged from slight (kappa=0.07) to moderate (kappa=0.53). F…	Y						N	X					Y	N	X					N	X					N
451	Ovid MEDLINE(R)	Differential factors associated with challenge-proven food allergy phenotypes in a population cohort of infants: a latent class analysis.	Clinical & Experimental Allergy. 45(5):953-963, 2015 May.	Journal Article Research Support, Non-U.S. Gov't	2015	English	Click here for full text options	BACKGROUND: Food allergy, eczema and wheeze are early manifestations of allergic disease and commonly co-occur in infancy although their interrelationship is not well understood. Data from population studies are essential to determine whether there are differential drivers of multi-allergy phenotypes. We aimed to define phenotypes and risk factors of allergic disease using latent class analysis (…	N		X				N	X	X				N
452	Ovid MEDLINE(R)	Expression patterns of superficial epidermal adhesion molecules in an experimental dog model of acute atopic dermatitis skin lesions.	Veterinary Dermatology. 26(1):53-6, e-17-8, 2015 Feb.	Journal Article	2015	English	Click here for full text options	BACKGROUND: The stratum corneum is critical for providing a functional skin barrier, especially in humans and dogs with atopic dermatitis. An effective barrier also depends upon intact corneodesmosomes and superficial epidermal tight junctions. HYPOTHESIS/OBJECTIVES: To study the expression of selected corneodesmosome, desmosome, tight and adherens junction proteins in an experimental model of ac…	N	X					N	X					N
453	Ovid MEDLINE(R)	A blinded, randomized clinical trial comparing the efficacy and safety of oclacitinib and ciclosporin for the control of atopic dermatitis in client-owned dogs.	Veterinary Dermatology. 26(1):23-30, e7-8, 2015 Feb.	Comparative Study Journal Article Randomized Controlled Trial Research Support, Non-U.S. Gov't	2015	English	Click here for full text options	BACKGROUND: Ciclosporin is approved for the treatment of atopic dermatitis (AD) in dogs and has been shown to be safe and effective. Placebo-controlled studies suggest that oclacitinib is a safe and effective alternative therapy. HYPOTHESIS/OBJECTIVES: To evaluate the efficacy and safety of oclacitinib, in comparison to ciclosporin, for the control of AD in a blinded, randomized clinical trial, i…	N	X					N	X					N
454	Ovid MEDLINE(R)	The influence of mometasone furoate ear solution on intradermal test immediate reactions in dogs with atopic dermatitis.	Veterinary Dermatology. 26(1):31-4, e9-10, 2015 Feb.	Journal Article Research Support, Non-U.S. Gov't	2015	English	Click here for full text options	BACKGROUND: Topical ear medications, often containing a glucocorticoid, are used to treat the clinical signs of atopic otitis in dogs. Studies have looked at the inhibitory effect of topical glucocorticoids on intradermal testing (IDT), but only one previously published study evaluated the influence of an otic glucocorticoid on the results of IDT in dogs. HYPOTHESIS/OBJECTIVES: To assess what inf…	Y						N	X					Y	N	X					N	X					N
455	Ovid MEDLINE(R)	Incidence and risk factors for food hypersensitivity in UK infants: results from a birth cohort study.	Clinical and Translational Allergy. 6:1, 2015.	Journal Article	2015	English	Click here for full text options	BACKGROUND: The prevalence of food hypersensitivity in the UK is still largely open to debate. Additionally its pathogenesis is also unclear although it is known that there are differing phenotypes. Determining its prevalence, along with identifying those factors associated with its development will help to assess its clinical importance within the national setting and also add to the debate on a…	N	X	X				N	X	X				N
456	Ovid MEDLINE(R)	Ten inherited disorders in purebred dogs by functional breed groupings.	Canine Genetics & Epidemiology. 2:9, 2015.	Journal Article	2015	English	Click here for full text options	BACKGROUND: Analysis of 88,635 dogs seen at the University of California, Davis Veterinary Medical Teaching Hospital from 1995 to 2010 identified ten inherited conditions having greater prevalence within the purebred dog population as compared to the mixed-breed dog population: aortic stenosis, atopy/allergic dermatitis, gastric dilatation volvulus (GDV), early onset cataracts, dilated cardiomyop…	N	X					N	X		X			N
457	Ovid MEDLINE(R)	Risk factors associated with asthma, atopic dermatitis and rhinoconjunctivitis in a rural Senegalese cohort.	Allergy, Asthma, & Clinical Immunology : Official Journal of the Canadian Society of Allergy & Clinical Immunology. 11(1):24, 2015.	Journal Article	2015	English	Click here for full text options	BACKGROUND: The World Allergy Organization estimates that 40 % of the world's population is affected by allergic diseases. The International Study of Asthma and Allergies in Childhood has completed Phase III and it has now become clear that these diseases have increased in developing countries, especially Africa, where prevalence rates were formerly low. Despite an increase in studies in Africa, …	N		X				N	X	X				N
458	Ovid MEDLINE(R)	Pollen Allergies in Humans and their Dogs, Cats and Horses: Differences and Similarities.	Clinical and Translational Allergy. 5:15, 2015.	Journal Article	2015	English	Click here for full text options	Both humans and their most important domestic animals harbor IgE and a similar IgE receptor repertoire and expression pattern. The same cell types are also involved in the triggering or regulation of allergies, such as mast cells, eosinophils or T-regulatory cells. Translational clinical studies in domestic animals could therefore help cure animal allergies and at the same time gather knowledge r…	N		X				N	X					N
459	Ovid MEDLINE(R)	Immunoproteomic characterization of a Dermatophagoides farinae extract used in the treatment of canine atopic dermatitis.	Veterinary Immunology & Immunopathology. 180:1-8, 2016 Nov 01.	Journal Article	2016	English	10.1016/j.vetimm.2016.08.004	BACKGROUND: Canine atopic dermatitis is a pruritic allergic skin disease. House dust mites have been identified as the main non-seasonal responsible agent. Unlike in human allergic patients, groups 1 and 2 antigens have been described as minor allergens in dogs, while groups 15 and 18 are considered the major allergens. Despite these differences, allergic dogs have traditionally been treated usin…	Y						N	X					Y	Y						Y						Y	Y						N	X						Y
460	Ovid MEDLINE(R)	A blinded, randomized, placebo-controlled, dose determination trial of lokivetmab (ZTS-00103289), a caninized, anti-canine IL-31 monoclonal antibody in client owned dogs with atopic dermatitis.	Veterinary Dermatology. 27(6):478-e129, 2016 Dec.	Journal Article Randomized Controlled Trial	2016	English	Click here for full text options	BACKGROUND: Pruritus is the hallmark clinical sign of atopic dermatitis (AD) in dogs. Lokivetmab, a caninized anti-canine IL-31 monoclonal antibody, reduced pruritus and associated inflammatory skin lesions in a proof-of-concept study in dogs with AD. HYPOTHESIS/OBJECTIVES: The objective was to describe lokivetmab dose response in a randomized, double blind, placebo-controlled trial. ANIMALS: Cli…	N	X					N	X	X				N
461	Ovid MEDLINE(R)	A blinded, randomized, placebo-controlled trial of the safety of lokivetmab (ZTS-00103289), a caninized anti-canine IL-31 monoclonal antibody in client-owned dogs with atopic dermatitis.	Veterinary Dermatology. 27(6):505-e136, 2016 Dec.	Journal Article Randomized Controlled Trial	2016	English	Click here for full text options	BACKGROUND: Lokivetmab (ZTS-00103289) is a caninized anti-canine IL-31 monoclonal antibody that has demonstrated efficacy in reducing pruritus associated with atopic dermatitis (AD) in dogs in field trials. HYPOTHESIS/OBJECTIVES: This study evaluated the safety of lokivetmab in a randomized, double blind, placebo-controlled trial in client owned dogs with AD with minimal restrictions on concomita…	N	X					N	X	X				N
462	Ovid MEDLINE(R)	Prospective pilot study to detect dogs with non food-induced canine atopic dermatitis using Fourier transform infrared spectroscopy.	Veterinary Dermatology. 27(5):356-e89, 2016 Oct.	Journal Article	2016	English	Click here for full text options	BACKGROUND: The diagnosis of canine atopic dermatitis (CAD) remains challenging due to the lack of a simple biomarker or metabolic profile. In human medicine, Fourier transform infrared spectroscopy (FTIR) is an analytical technique used for several diseases. It requires a small amount of sample and allows the identification of structural moieties of biomolecules on the basis of their infrared ab…	N	X					Y						Y	N	X					Y						N
463	Ovid MEDLINE(R)	Prenatal and early-life predictors of atopy and allergic disease in Canadian children: results of the Family Atherosclerosis Monitoring In earLY life (FAMILY) Study.	Journal of Developmental Origins of Health and Disease. 7(6):665-671, 2016 12.	Journal Article Research Support, Non-U.S. Gov't	2016	English	Click here for full text options	Prenatal and early-life environmental exposures play a key role in the development of atopy and allergic disease. The Family Atherosclerosis Monitoring In earLY life Study is a general, population-based Canadian birth cohort that prospectively evaluated prenatal and early-life traits and their association with atopy and/or allergic disease. The study population included 901 babies, 857 mothers an…	N		X				N		X				N
464	Ovid MEDLINE(R)	IgE reactivity to hen egg white allergens in dogs with cutaneous adverse food reactions.	Veterinary Immunology & Immunopathology. 177:52-7, 2016 Sep.	Journal Article	2016	English	Click here for full text options	Dogs with cutaneous adverse food reactions (CAFR) often have specific IgE to food allergens. Egg white, which is majorly composed of ovomucoid, ovalbumin, ovotransferrin, and lysozyme, is a food allergen in dogs. Information of the IgE reactivity to purified egg white allergens supports accurate diagnosis and efficiency treatment in humans. However, to the best of our knowledge, there have been n…	Y						N	X					Y	N	X					N	X					N
465	Ovid MEDLINE(R)	A double blind, randomized, placebo controlled trial of the efficacy, quality of life and safety of food allergen-specific sublingual immunotherapy in client owned dogs with adverse food reactions: a small pilot study.	Veterinary Dermatology. 27(5):361-e91, 2016 Oct.	Journal Article Randomized Controlled Trial	2016	English	Click here for full text options	BACKGROUND: Food allergen-specific sublingual immunotherapy (FA-SLIT) has emerged as a novel and successful approach for desensitizing human patients to specific food allergens. It has not been tested in dogs. OBJECTIVE: To investigate the efficacy, quality of life (QoL), tolerability and safety of FA-SLIT in dogs with adverse food reactions (AFR). METHODS: Dogs with proven AFR were randomized to…	N	X					N	X	X				N
466	Ovid MEDLINE(R)	Domestic dog exposure at birth reduces the incidence of atopic dermatitis.	Allergy. 71(12):1736-1744, 2016 12.	Journal Article	2016	English	Click here for full text options	BACKGROUND: While the etiopathogenesis of atopic dermatitis is complex and poorly understood, neonatal exposures are important for disease occurrence. However, the effect of dog exposure on the risk of atopic dermatitis is unresolved. OBJECTIVE: We investigated whether domestic dog exposure affected the risk of atopic dermatitis in children during the first 3 years of life. METHODS: Copenhagen Pr…	N		X				N		X				N
467	Ovid MEDLINE(R)	Evaluation of cytology collection techniques and prevalence of Malassezia yeast and bacteria in claw folds of normal and allergic dogs.	Veterinary Dermatology. 27(4):279-e67, 2016 Aug.	Journal Article	2016	English	Click here for full text options	BACKGROUND: Canine bacterial and Malassezia paronychia are common secondary complications of atopic dermatitis and adverse food reactions. HYPOTHESIS/OBJECTIVES: The aim of this study was to compare three different sampling methods for claw fold cytology and to evaluate the numbers of bacteria, Malassezia yeast and inflammatory cells. ANIMALS: Sixty client-owned dogs were classified into three gr…	Y						Y						Y	Y						N	X					N
468	Ovid MEDLINE(R)	Specific IgE Antibodies in Young Children with Atopic Dermatitis--Correlation of Multiple Allergen Simultaneous Immunoblot Test and ImmunoCap System.	Clinical Laboratory. 62(5):815-21, 2016.	Journal Article Research Support, Non-U.S. Gov't	2016	English	Click here for full text options	BACKGROUND: Sensitization to food allergens is a common condition in pediatric atopic dermatitis (AD). Recently, the multiple allergen simultaneous test (MAST) allowing for a comprehensive assessment of atopy has been developed, but the usefulness in young AD children is not known. The aim of this study was to determine IgE specificity in AD children using MAST and to compare the results for sele…	N	X					N	X	X				N
469	Ovid MEDLINE(R)	Early Activation of Th2/Th22 Inflammatory and Pruritogenic Pathways in Acute Canine Atopic Dermatitis Skin Lesions.	Journal of Investigative Dermatology. 136(10):1961-1969, 2016 10.	Journal Article	2016	English	Click here for full text options	Determining inflammation and itch pathway activation in patients with atopic dermatitis (AD) is fraught with the inability to precisely assess the age of skin lesions, thus affecting the analysis of time-dependent mediators. To characterize inflammatory events occurring during early experimental acute AD lesions, biopsy samples were collected 6, 24, and 48 hours after epicutaneous application of …	N	X					N	X					N
470	Ovid MEDLINE(R)	A randomized, double-blinded crossover trial testing the benefit of two hydrolysed poultry-based commercial diets for dogs with spontaneous pruritic chicken allergy.	Veterinary Dermatology. 27(4):289-e70, 2016 Aug.	Journal Article Randomized Controlled Trial	2016	English	Click here for full text options	BACKGROUND: Hydrolysed protein diets are used to diagnose and treat dogs with cutaneous adverse food reactions (CAFR). Little is known about what proportion of dogs hypersensitive to the native protein would react to its hydrolysed form. OBJECTIVES: To determine the clinical allergenicity of hydrolysed poultry feather (RCU) and chicken liver diets (HZD) in dogs with chicken induced CAFR. METHODS:…	N	X					N	X					N
471	Ovid MEDLINE(R)	Effects of cetirizine in dogs with chronic atopic dermatitis: a randomized, double blind, placebo-controlled trial.	Journal of Veterinary Science. 17(4):549-553, 2016 Dec 30.	Journal Article Randomized Controlled Trial	2016	English	Click here for full text options	This study was conducted to evaluate the effects of cetirizine in dogs with atopic dermatitis (AD) while fulfilling Favrot's diagnostic clinical criteria. Dogs received either 3 mg/kg cetirizine (n = 27), or a placebo (n = 23) orally once daily for 14 days in a randomized, double blind, placebo-controlled study, without concomitant medication. The effects were evaluated using a pruritus visual an…	N	X					N	X					N
472	Ovid MEDLINE(R)	Hyper IgE in Childhood Eczema and Risk of Asthma in Chinese Children.	Molecules. 21(6), 2016 Jun 10.	Journal Article	2016	English	Click here for full text options	BACKGROUND: Atopic eczema is a common childhood disease associated with high IgE and eosinophilia. We characterized the clinical features associated with hyper-IgE (defined as IgE > 2000 IU/L) in eczema. METHODS: Nottingham Eczema Severity Score (NESS), family and personal history of atopy, skin prick test (SPT) for common food and aeroallergens, highest serum IgE ever and eosinophil counts were …	N	X					N	X	X				N
473	Ovid MEDLINE(R)	Serum Malassezia-specific IgE in dogs with recurrent Malassezia otitis externa without concurrent skin disease.	Veterinary Immunology & Immunopathology. 176:1-4, 2016 Aug.	Journal Article	2016	English	10.1016/j.vetimm.2016.05.008	Immediate-type hypersensitivity (ITH), mediated by IgE, to Malassezia pachydermatis is recognized in atopic dogs with recurrent yeast dermatitis and otitis externa (OE). Malassezia-associated OE commonly occurs in dogs without other signs of atopic dermatitis (AD). The aim of this study was to detect Malassezia-specific IgE in the sera of dogs with recurrent Malassezia OE without concurrent skin …	Y						N	X					Y	Y						Y						Y	N						N	X						N
474	Ovid MEDLINE(R)	A Novel Imaging System Distinguishes Neoplastic from Normal Tissue During Resection of Soft Tissue Sarcomas and Mast Cell Tumors in Dogs.	Veterinary Surgery. 45(6):715-22, 2016 Aug.	Journal Article	2016	English	Click here for full text options	OBJECTIVE: To assess the ability of a novel imaging system designed for intraoperative detection of residual cancer in tumor beds to distinguish neoplastic from normal tissue in dogs undergoing resection of soft tissue sarcoma (STS) and mast cell tumor (MCT). STUDY DESIGN: Non-randomized prospective clinical trial. ANIMALS: 12 dogs with STS and 7 dogs with MCT. METHODS: A fluorescent imaging agen…	N	X					N	X					N
475	Ovid MEDLINE(R)	Canine atopic dermatitis: breed risk in Australia and evidence for a susceptible clade. [Review]	Veterinary Dermatology. 27(3):167-e42, 2016 Jun.	Journal Article Review Systematic Review	2016	English	Click here for full text options	BACKGROUND: Genetic studies on canine atopic dermatitis (CAD) indicate that large populations from one geographical location are preferred for the identification of relevant susceptibility genes. Australian dogs are relatively isolated; studies on CAD in this population are limited. HYPOTHESIS/OBJECTIVES: To identify breeds at risk in the Australian dog population and to compare with worldwide br…	N			X			N	X		X			N
476	Ovid MEDLINE(R)	Evaluation of cyclosporine-sparing effects of polyunsaturated fatty acids in the treatment of canine atopic dermatitis.	Veterinary Journal. 210:77-81, 2016 Apr.	Journal Article Multicenter Study Randomized Controlled Trial Research Support, Non-U.S. Gov't	2016	English	Click here for full text options	A randomised, double-blinded, placebo-controlled multicentre trial was conducted in 36 dogs with atopic dermatitis to evaluate the cyclosporine-sparing effect of polyunsaturated fatty acids. Dogs were stable on their individual cyclosporine dosage and received either a mainly omega-3 fatty acid product with a minor omega-6 fatty acid fraction or placebo, orally for 12 weeks. Dogs were examined ev…	N	X					N	X					N
477	Ovid MEDLINE(R)	Bioequivalence study between two formulations of ciclosporin A (Cyclavance R oral solution and Atopica R soft capsules) following a single oral administration to dogs.	BMC Veterinary Research [Electronic Resource]. 12:54, 2016 Mar 12.	Clinical Trial Journal Article Research Support, Non-U.S. Gov't	2016	English	Click here for full text options	BACKGROUND: Ciclosporin is a selective immunomodulator used for the treatment of atopic dermatitis in dogs. A new 100 mg/ml oral solution formulation (Cyclavance R, Virbac) was developed as a pharmaceutical equivalent to the marketed capsule formulations (Atopica R, Novartis Animal Health) containing 25, 50 mg, or 100 mg of ciclosporin A. The aim of this study was to assess and compare the pharma…	N	X					N	X					N
478	Ovid MEDLINE(R)	Early indoor aeroallergen exposure is not associated with development of sensitization or allergic rhinitis in high-risk children.	Allergy. 71(5):684-91, 2016 05.	Journal Article Research Support, Non-U.S. Gov't	2016	English	Click here for full text options	RATIONALE: Allergen exposure is associated with the development of allergic sensitization in childhood as reflected by global variations in sensitization patterns. However, there is little evidence to support a direct association. OBJECTIVES: To investigate the association between perinatal aeroallergen exposure and sensitization and rhinitis to such allergens later in childhood. METHODS: Allergi…	N		X				N	X	X				N
479	Ovid MEDLINE(R)	Decreased expression of caspase-14 in an experimental model of canine atopic dermatitis.	Veterinary Journal. 209:201-3, 2016 Mar.	Journal Article	2016	English	Click here for full text options	Alterations in skin barrier function and filaggrin expression have been reported in atopic dermatitis (AD). Caspase-14, a protease important for filaggrin processing, is decreased in human AD. Atopic Beagle dogs with skin barrier alterations have been validated as model for AD. This study aimed to investigate caspase-14 in normal and atopic Beagle dogs. Skin biopsies from non-lesional and control…	N	X					N	X					N
480	Ovid MEDLINE(R)	Efficacy of proactive long-term maintenance therapy of canine atopic dermatitis with 0.0584% hydrocortisone aceponate spray: a double-blind placebo controlled pilot study.	Veterinary Dermatology. 27(2):88-92e25, 2016 Apr.	Journal Article Randomized Controlled Trial	2016	English	Click here for full text options	BACKGROUND: Long-term remission between flares of canine atopic dermatitis (CAD) can be difficult to achieve. Therefore, additional strategic forms of treatment are needed in order to target flare prevention. The concept of proactive therapy is recommended in the European guidelines for the treatment of human atopic eczema. OBJECTIVES: To evaluate the efficacy of a proactive treatment regimen wit…	N	X					N	X					N
481	Ovid MEDLINE(R)	Clinical and immunological responses of dust mite sensitive, atopic dogs to treatment with sublingual immunotherapy (SLIT).	Veterinary Dermatology. 27(2):82-7e23, 2016 Apr.	Clinical Trial Journal Article	2016	English	Click here for full text options	BACKGROUND: Sublingual immunotherapy (SLIT) has been reported to be beneficial in people with atopic dermatitis (AD) and dust mite sensitivity. Evaluation of this therapy has not been reported in spontaneous canine AD. OBJECTIVES: The objective of this study was to preliminarily evaluate the effectiveness of an established SLIT protocol, as used in human patients, in dogs with AD. ANIMALS: Ten du…	N	X					Y						Y	N	X					N	X					N
482	Ovid MEDLINE(R)	Efficacy of medicinal essential oils against pathogenic Malassezia sp. isolates.	Journal de Mycologie Medicale. 26(1):28-34, 2016 Mar.	Journal Article Research Support, Non-U.S. Gov't	2016	English	Click here for full text options	OBJECTIVES: The purposes of this study were to evaluate the distribution pattern and population size of Malassezia species in dogs with atopic dermatitis (AD) and the inhibitory efficacy of Zataria multiflora, Thymus kotschyanus, Mentha spicata, Artemisia sieberi, Rosmarinus officinalis and Heracleum persicum essential oils against pathogenic Malassezia isolates. METHODS: The samples were collect…	N	X					N	X					N
483	Ovid MEDLINE(R)	Atopic dermatitis and the intestinal microbiota in humans and dogs. [Review]	Veterinary Medicine & Science. 2(2):95-105, 2016 May.	Journal Article Review	2016	English	Click here for full text options	The prevalence of human and canine allergic diseases is commonly perceived to be increasing. Suggested predisposing factors in people and dogs include increased allergen load, increased exposure to pollutants, reduced family size, reduced microbial load and less exposure to infection at a young age, increasingly urbanised environment, and changes in dietary habits. Genetic make-up may provide a t…	Y						N			X			Y	N	X		X			N	X					N
484	Ovid MEDLINE(R)	Gender aspects in allergies of pets - A secondary publication and update. [Review]	World Allergy Organization Journal. 10(1):42, 2017.	Journal Article Review	2017	English	Click here for full text options	Allergies need not only affect humans; this multifactorial and complex disease can also affect animals. Comparative allergology investigates the many similarities between the pathogenesis, clinics, diagnosis, and therapy of the disorders in humans and pet animals. In contrast to human allergy research, the veterinary field lacks access to a central database, which means there are no cohort studie…	N			X			N		X	X			N
485	Ovid MEDLINE(R)	Clinical and histologic features of acute-onset erythroderma in dogs with gastrointestinal disease: 18 cases (2005-2015).	Journal of the American Veterinary Medical Association. 251(12):1439-1449, 2017 Dec 15.	Case Reports Journal Article	2017	English	Click here for full text options	OBJECTIVE To describe the clinical and histologic features of acute erythroderma in dogs with gastrointestinal disease. DESIGN Retrospective case series. ANIMALS 18 dogs with erythroderma and gastrointestinal disease. PROCEDURES Medical records and biopsy specimens were reviewed. Information collected from medical records included signalment, clinical signs, physical examination and diagnostic te…	N	X					N	X					N
486	Ovid MEDLINE(R)	[Targeting the skin - erythema multiforme in dogs and cats]. [Review] [German]	Tierarztliche Praxis. Ausgabe K, Kleintiere/Heimtiere. 45(5):352-356, 2017 10 17.	Journal Article Review	2017	German	Click here for full text options	This review article will describe the complex nature of erythema multiforme in dogs and cats. The disease pattern will be illustrated in terms of etiology, pathogenesis, clinical signs, diagnostics and therapy. Erythema multiforme is a rare, immune-mediated skin disorder with an acute specific reaction pattern of skin and mucous membranes against different underlying causes. Reported triggering f…	N			X			N	X		X	X		N
487	Ovid MEDLINE(R)	Assessment of allergen-specific IgE by immunoblotting method in atopic dermatitis.	European Annals of Allergy & Clinical Immunology. 49(5):213-219, 2017 Sep.	Journal Article	2017	English	Click here for full text options	SUMMARY: Background and Objectives . Stimulating the immune system by exposure to various allergens to produce specific IgE has a significant role in the pathogenesis of atopic dermatitis. Identifying disease-causing allergens, prevention of exposure to those allergens, and immunotherapy will play an important role in the treatment of Atopic Disease. The purpose of this study was to determine the…	Y						Y						Y	N	X	X				N		X				N
488	Ovid MEDLINE(R)	A pilot study of the effect of pullulan-conjugated Der f 2 allergen-specific immunotherapy on canine atopic dermatitis.	Veterinary Dermatology. 28(6):583-e141, 2017 Dec.	Journal Article	2017	English	Click here for full text options	BACKGROUND: Dermatophagoides farinae is a major and common environmental house dust mite involved in canine atopic dermatitis (CAD). A formulation of recombinant protein Der f 2 is available in Japan for immunotherapy in dogs. HYPOTHESIS/OBJECTIVES: To evaluate the efficacy of a recombinant allergen based on Der f 2-pullulan for the treatment of cAD. METHODS: Dogs (n = 15) with atopic dermatitis …	Y						N	X					Y	Y						N	X					N
489	Ovid MEDLINE(R)	Results of allergen-specific immunotherapy in atopic dogs with Malassezia hypersensitivity: a retrospective study of 16 cases.	Veterinary Dermatology. 28(6):633-e157, 2017 Dec.	Case Reports	2017	English	Click here for full text options	BACKGROUND: Hypersensitivity reactions to Malassezia spp have been shown to occur in dogs with atopic dermatitis (AD) and to cause exacerbation of clinical signs. Improvement of clinical signs following use of antifungal medication is seen with both Malassezia overgrowth or Malassezia hypersensitivity (MHS). Subcutaneous immunotherapy (SCIT) is considered a safe and effective treatment for manage…	N	X					N	X					N
490	Ovid MEDLINE(R)	Randomized, double-blinded, placebo-controlled pilot study on the effects of topical blackcurrant emulsion enriched in essential fatty acids, ceramides and 18-beta glycyrrhetinic acid on clinical signs and skin barrier function in dogs with atopic dermatitis.	Veterinary Dermatology. 28(6):577-e140, 2017 Dec.	Journal Article Randomized Controlled Trial	2017	English	Click here for full text options	BACKGROUND: Lipid-based emulsions can be useful for the management of canine atopic dermatitis (cAD). 18-beta glycyrrhetinic acid (GRA), a component of liquorice root, has anti-inflammatory and anti-pruritic effects. HYPOTHESIS/OBJECTIVES: To evaluate the effects of a topical lipid emulsion containing ceramides, fatty acids and GRA on clinical signs of cAD and skin barrier in a randomized, double…	N	X					N	X					N
491	Ovid MEDLINE(R)	A double-blinded, randomized, controlled, crossover evaluation of a zinc methionine supplement as an adjunctive treatment for canine atopic dermatitis.	Veterinary Dermatology. 28(6):569-e138, 2017 Dec.	Journal Article Randomized Controlled Trial	2017	English	Click here for full text options	BACKGROUND: Zinc is important for skin health and proper immune system function. HYPOTHESIS/OBJECTIVES: A zinc methionine, essential fatty acids (EFA) and biotin product (Zn supplement) was compared to an EFA and biotin product (control) in canine atopic dermatitis (CAD). ANIMALS: Twenty seven client-owned dogs with chronic CAD receiving ciclosporin or glucocorticoids. METHODS: A 24 week, randomi…	N	X					N	X					N
492	Ovid MEDLINE(R)	Comparison of the intradermal irritant threshold concentrations of nine allergens from two different manufacturers in clinically nonallergic dogs in the USA.	Veterinary Dermatology. 28(6):564-e136, 2017 Dec.	Comparative Study Journal Article	2017	English	Click here for full text options	BACKGROUND: The intradermal irritant threshold concentration for many allergens is unknown. OBJECTIVE: To determine the intradermal irritant threshold concentration (ITC) of nine allergens from two different manufacturers. ANIMALS: Twenty privately owned clinically nonallergic dogs. METHODS: Alternaria, cat dander, Dermatophagoides farinae, Chenopodium album (lamb's quarter), Xanthium strumarium …	Y						N	X					Y	Y						N	X					N
493	Ovid MEDLINE(R)	Relevance of Cat and Dog Sensitization by Skin Prick Testing in Childhood Eczema and Asthma.	Current Pediatric Review. 13(2):120-125, 2017.	Journal Article	2017	English	Click here for full text options	BACKGROUND: Household animal dander has been implicated as aeroallergen in childhood atopic diseases. Many parents seek healthcare advice if household pet keeping may be detrimental in atopic eczema (AE), allergic rhinitis and asthma. AIM: We investigated if skin sensitization by cat/dog dander was associated with disease severity and quality of life in children with AE. METHODS: Demographics, sk…	N		X				N	X	X				N
494	Ovid MEDLINE(R)	Natural history of skin prick test reactivity: A 20-year prospective study of a random population sample of children and adolescents.	Annals of Allergy, Asthma, & Immunology. 119(2):184-188.e1, 2017 08.	Journal Article	2017	English	Click here for full text options	BACKGROUND: Allergic reactions to airborne allergens may have important consequences for affected individuals and are believed to be unstable through life, although evidence from longitudinal studies is limited. OBJECTIVE: To assess changes in skin prick reactivity during 20 years in a random population sample of children and adolescents in relation to symptoms of rhinitis. METHODS: A total of 98…	N		X				N		X				N
495	Ovid MEDLINE(R)	Reclassifying Anaphylaxis to Neuromuscular Blocking Agents Based on the Presumed Patho-Mechanism: IgE-Mediated, Pharmacological Adverse Reaction or "Innate Hypersensitivity"?. [Review]	International Journal of Molecular Sciences. 18(6), 2017 Jun 07.	Journal Article Review	2017	English	Click here for full text options	Approximately 60% of perioperative anaphylactic reactions are thought to be immunoglobulin IgE mediated, whereas 40% are thought to be non-IgE mediated hypersensitivity reactions (both considered non-dose-related type B adverse drug reactions). In both cases, symptoms are elicited by mast cell degranulation. Also, pharmacological reactions to drugs (type A, dose-related) may sometimes mimic sympt…	N	X					N	X		X			N
496	Ovid MEDLINE(R)	Environmental and phenotype-related risk factors for owner-reported allergic/atopic skin symptoms and for canine atopic dermatitis verified by veterinarian in a Finnish dog population.	PLoS ONE [Electronic Resource]. 12(6):e0178771, 2017.	Journal Article	2017	English	10.1371/journal.pone.0178771	The aim of this cross-sectional study was to observe whether environmental factors and phenotypic traits are associated with owner-reported skin problems and with veterinary diagnosed canine atopic dermatitis (CAD). Data were collected using the validated online DOGRISK questionnaire. Out of the data that the questionnaire provides for analysis, focus was first turned towards addressing questions…	Y						N	X					Y	Y						Y						Y	N						N	X						N
497	Ovid MEDLINE(R)	Particular characteristics of atopic eczema in tropical environments. The Tropical Environment Control for Chronic Eczema and Molecular Assessment (TECCEMA) cohort study.	Anais Brasileiros de Dermatologia. 92(2):177-183, 2017 Mar-Apr.	Journal Article	2017	English	Click here for full text options	BACKGROUND:: Atopic dermatitis is a prevalent health problem in the world. Allergic sensitization is an important risk factor, but the roles of other factors, inherent in tropic region, are unknown. OBJECTIVE:: A cohort study was designed in a tropical city to investigate molecular and environmental risk factors for eczema, considering as particular features perennial exposure to mites, poor livi…	N		X				N	X					N
498	Ovid MEDLINE(R)	Vitamin D levels and allergic diseases. An italian cross-sectional multicenter survey.	European Annals of Allergy & Clinical Immunology. 49(2):75-79, 2017 Mar.	Journal Article Multicenter Study	2017	English	Click here for full text options	SUMMARY: Background. During the two last decades, the interest in the role of Vitamin D (VD) in allergic disease has increased. Apart from the well-known actions of VD in bone metabolism, recent studies suggested its possible role as an immune-modulator in allergy. Objective. This study, conducted over the Italian territory, evaluated the possible correlations between VD serum level and diagnosed…	N		X				N	X	X				N
499	Ovid MEDLINE(R)	The effects of a topical lipid complex therapy on dogs with atopic dermatitis: a double blind, randomized, placebo-controlled study.	Veterinary Dermatology. 28(4):369-e84, 2017 Aug.	Journal Article Randomized Controlled Trial	2017	English	Click here for full text options	BACKGROUND: Canine atopic dermatitis is a common clinical presentation. The skin barrier seems to play a fundamental role in the pathogenesis. Therefore a topical spot-on product containing a mixture of lipids may improve clinical signs without adverse effects if it were to improve stratum corneum barrier function. ANIMALS: Twenty six privately owned atopic dogs of different breed, age, gender an…	N	X					N	X					N
500	Ovid MEDLINE(R)	Critically appraised topic on adverse food reactions of companion animals (3): prevalence of cutaneous adverse food reactions in dogs and cats. [Review]	BMC Veterinary Research [Electronic Resource]. 13(1):51, 2017 Feb 15.	Journal Article Review	2017	English	Click here for full text options	BACKGROUND: The prevalence of cutaneous adverse food reactions (CAFRs) in dogs and cats is not precisely known. This imprecision is likely due to the various populations that had been studied. Our objectives were to systematically review the literature to determine the prevalence of CAFRs among dogs and cats with pruritus and skin diseases. RESULTS: We searched two databases for pertinent referen…	N	X					N	X		X			N
501	Ovid MEDLINE(R)	The future of immunotherapy for canine atopic dermatitis: a review. [Review]	Veterinary Dermatology. 28(1):25-e6, 2017 Feb.	Journal Article Review	2017	English	Click here for full text options	Allergen specific immunotherapy (ASIT) is a foundation treatment for canine atopic dermatitis (CAD), though few critical studies have documented its effectiveness as a disease-modifying treatment in dogs. The mechanisms by which ASIT works in dogs have not been elucidated, although they are likely to parallel those known for humans. Current ASIT approaches in CAD focus on either subcutaneous or s…	N			X			N	X		X			N
502	Ovid MEDLINE(R)	Evaluation of intraepidermal nerve fibres in the skin of normal and atopic dogs.	Veterinary Dermatology. 28(4):355-e80, 2017 Aug.	Journal Article	2017	English	10.1111 /vde.12420	BACKGROUND: Interest in intraepidermal nerve fibres (IENFs) is rising in human medicine, because variations in fibre density occur in some diseases and these neurites might contribute to disease pathogenesis. An increase in IENF density is seen in human atopic dermatitis (AD); there are no such data in atopic dogs. OBJECTIVES: To compare the prevalence of IENFs in normal and atopic canine skin. M…	Y						N	X					Y	Y						Y						Y	Y						N	X						N
503	Ovid MEDLINE(R)	Western blot analysis of sera from dogs with suspected food allergy.	Veterinary Dermatology. 28(2):189-e42, 2017 Apr.	Journal Article	2017	English	Click here for full text options	BACKGROUND: Food allergy is often suspected in dogs with clinical signs of atopic dermatitis. This diagnosis is confirmed with an elimination diet and a subsequent challenge with regular food. Laboratory tests for the diagnosis of food allergy in dogs are unreliable and/or technically difficult. Cyno-DIAL R is a Western blot method that might assist with the selection of an appropriate eliminatio…	N	X					N	X					N
504	Ovid MEDLINE(R)	Polymorphic eruption of pregnancy: Review of literature. [Review]	Journal of Obstetrics & Gynaecology. 37(2):137-140, 2017 Feb.	Journal Article Review	2017	English	Click here for full text options	Polymorphic Eruption of Pregnancy (PEP) is one of the most common dermatosis related to pregnancy. PEP usually consists of pruritic papules and plaques appearing in the third trimester of pregnancy. It is more common in primigravidae and twin pregnancies. Although not associated with poorer foetal or maternal outcomes, it may be hard for pregnant women to endure. The diagnosis is easy if suspecte…	N	X					N	X		X			N
505	Ovid MEDLINE(R)	Subgroup differences in the associations between dog exposure during the first year of life and early life allergic outcomes.	Clinical & Experimental Allergy. 47(1):97-105, 2017 01.	Journal Article Research Support, N.I.H., Extramural Research Support, Non-U.S. Gov't	2017	English	Click here for full text options	BACKGROUND: The effect of dog exposure on the risk of children developing allergic disease remains controversial. Many analyses have not considered that associations may vary within population subgroups. OBJECTIVE: To examine whether associations between living with a dog in the first year of life and allergic outcomes vary within subgroups selected a priori (race, gender and delivery mode). METH…	N	X					N	X	X				N
506	Ovid MEDLINE(R)	Interleukin (IL) 31 induces in cynomolgus monkeys a rapid and intense itch response that can be inhibited by an IL-31 neutralizing antibody.	Journal of the European Academy of Dermatology & Venereology. 31(1):142-150, 2017 Jan.	Journal Article	2017	English	Click here for full text options	BACKGROUND: Overexpression or administration of interleukin 31 (IL-31) has been shown to induce a profound itch response in mice and dogs. The chronic pruritus observed in mouse IL-31 transgenic mice results in the development of skin lesions and alopecia through excoriation from excessive scratching, a condition similar to that observed in patients with atopic dermatitis (AD). OBJECTIVE: To test…	N	X					N	X	X				N
507	Ovid MEDLINE(R)	Respiratory comorbidity in South African children with atopic dermatitis.	South African Medical Journal. Suid-Afrikaanse Tydskrif Vir Geneeskunde. 107(10):904-909, 2017 Sep 22.	Journal Article	2017	English	Click here for full text options	BACKGROUND: Atopic dermatitis (AD) is an early and important step in the propagation of the allergic march, enhancing food and respiratory allergies via epicutaneous sensitisation to allergens. OBJECTIVES: To determine the prevalence and patterns of aeroallergen sensitisation, asthma and allergic rhinitis in South African (SA) children with AD. METHODS: This was a prospective, observational study…	N		X				N	X	X				N
508	Ovid MEDLINE(R)	Sensitization to secretoglobin and lipocalins in a group of young children with risk of developing respiratory allergy.	Clinical & Molecular Allergy. 15:4, 2017.	Journal Article	2017	English	Click here for full text options	BACKGROUND: Multiple sensitizations in early age have been reported to be a risk for development of asthma. This study evaluates the emergence and evolution of IgE to aeroallergens among a cohort of children with physician-diagnosed atopic dermatitis and/or showing food allergy symptoms and to examine the relation to asthma development. METHODS: Three-hundred and four children (median age 13.4 mo…	N	X					N	X	X				N
509	Ovid MEDLINE(R)	An open study on the efficacy of a recombinant Der f 2 (Dermatophagoides farinae) immunotherapy in atopic dogs in Hungary and Switzerland.	Veterinary Dermatology. 2018 Jun 17	Journal Article	2018	English	Click here for full text options	BACKGROUND: Previously published studies evaluating a recombinant Der f 2-based immunotherapy have demonstrated efficacy in the treatment of dogs experimentally and naturally sensitized to house dust mites (HDM). Der f 2 sensitization is thought to play a minor role in European atopic dogs sensitized to HDM. OBJECTIVE: The study evaluated the short-term efficacy of a recombinant Der f 2 product i…	N	X					N	X					N
510	Ovid MEDLINE(R)	A pilot study of total and allergen-specific IgE serum levels during anestrous, estrous and pregnancy in healthy female dogs.	Veterinary Dermatology. 2018 Apr 23	Journal Article	2018	English	10.1111/vde.12544	BACKGROUND: Allergen-specific IgE serology is used for the determination of sensitization status in dogs with atopic dermatitis; the influence of the female reproductive cycle on the results of such methods has not been studied in dogs. OBJECTIVES: To compare the total and allergen-specific IgE of healthy bitches during anestrous, estrous and pregnancy. ANIMALS: Eight privately owned, healthy bit…	Y						N	X					Y	Y						Y						Y	Y						N	X						N
511	Ovid MEDLINE(R)	Atopic dermatitis in cats and dogs: a difficult disease for animals and owners. [Review]	Clinical and Translational Allergy. 8:41, 2018.	Journal Article Review	2018	English	Click here for full text options	The purpose of this review article is to give an overview of atopic dermatitis in companion animals and of recent developments including knowledge on immunological background, novel treatment options and difficulties in disease management. The prevalence of hypersensitivities seems to be increasing. The pathogenetic mechanisms are not fully understood, yet multiple gene abnormalities and altered …	N	X					N			X			N
512	Ovid MEDLINE(R)	Pet-keeping in early life reduces the risk of allergy in a dose-dependent fashion.	PLoS ONE [Electronic Resource]. 13(12):e0208472, 2018.	Journal Article Research Support, Non-U.S. Gov't	2018	English	Click here for full text options	OBJECTIVES: Several studies have indicated that early pet keeping could protect the infant from later allergy development. Here, we investigate if there is a dose-dependent association between cat- and dog-keeping during the first year of life and subsequent allergy development. METHODS: Two cohorts were investigated: a cross-sectional questionnaire-based study of 7- to 8-year-old children (N = 1…	N		X				N	X	X				N
513	Ovid MEDLINE(R)	Effect of an insect protein-based diet on clinical signs of dogs with cutaneous adverse food reactions.	Tierarztliche Praxis. Ausgabe K, Kleintiere/Heimtiere. 46(5):297-302, 2018 Oct.	Journal Article	2018	English	Click here for full text options	OBJECTIVE: Edible insects (like mealworms, locusts and crickets) contain energy, protein, fatty acids, minerals and trace elements and have been found to be high quality food sources. They could provide a new food source for patients with adverse food reactions, as well as being of ecological and ethical interest. The aim of this study was to evaluate the effect of a new commercially available, i…	N	X					N	X					N
514	Ovid MEDLINE(R)	Clinical-pathological and immunological biomarkers in dogs with atopic dermatitis.	Veterinary Immunology & Immunopathology. 205:58-64, 2018 Nov.	Journal Article	2018	English	10.1016 /j.vetimm.2018.10.009	Canine atopic dermatitis (CAD) is a chronic, pruritic, genetic, and inflammatory disease. Its pathogenesis is very complex and involves skin barrier defects and immune system dysfunction. This study aimed to investigate hematological, biochemical, clinical, and immunological parameters to contribute to the identification of biomarkers applied to CAD. The results of the analysis on hematologic and…	Y						Y						Y	N	X					N	X					N
515	Ovid MEDLINE(R)	Welfare-Adjusted Life Years (WALY): A novel metric of animal welfare that combines the impacts of impaired welfare and abbreviated lifespan.	PLoS ONE [Electronic Resource]. 13(9):e0202580, 2018.	Journal Article Research Support, Non-U.S. Gov't	2018	English	Click here for full text options	Currently, separate measures are used to estimate the impact of animal diseases on mortality and animal welfare. This article introduces a novel metric, the Welfare-Adjusted Life Year (WALY), to estimate disease impact by combining welfare compromise and premature death components. Adapting the Disability-Adjusted Life Year approach used in human health audits, we propose WALY as the sum of a) th…	N	X					N	X					N
516	Ovid MEDLINE(R)	Allogeneic adipose-derived mesenchymal stem cell therapy in dogs with refractory atopic dermatitis: clinical efficacy and safety.	Veterinary Record. 183(21):654, 2018 Dec 01.	Clinical Trial, Veterinary Journal Article	2018	English	Click here for full text options	Canine atopic dermatitis (AD) is a common skin disease with a 10-15 per cent prevalence. Current treatments vary in their efficacy and safety. The immunomodulatory properties of mesenchymal stem cells (MSCs) make them a promising alternative treatment. The aim of this study was to evaluate the therapeutic efficacy and safety of allogeneic canine adipose MSCs (cAd-MSCs) in dogs with refractory AD.…	N	X					N	X					N
517	Ovid MEDLINE(R)	An open label clinical trial to evaluate the utility of a hydrolysed fish and rice starch elimination diet for the diagnosis of adverse food reactions in dogs.	Veterinary Dermatology. 29(5):408-e134, 2018 Oct.	Journal Article	2018	English	Click here for full text options	BACKGROUND: The diagnosis of adverse food reaction (AFR) is based on an eight week elimination diet (ED) and is confirmed by relapse upon re-challenge with the previously fed diet. Hydrolysed EDs are commonly used for this purpose. OBJECTIVE: To evaluate a commercially available hydrolysed fish protein and rice starch ED for the diagnosis of AFR. ANIMALS: Fifty nonseasonally pruritic dogs. METHOD…	N	X					N	X					N
518	Ovid MEDLINE(R)	Ear canal microbiota - a comparison between healthy dogs and atopic dogs without clinical signs of otitis externa.	Veterinary Dermatology. 29(5):425-e140, 2018 Oct.	Comparative Study Journal Article	2018	English	Click here for full text options	BACKGROUND: The canine skin microbiota has been evaluated using relatively new microbiological techniques; studies have shown a difference in the composition of bacterial populations between healthy dogs and those with canine atopic dermatitis (cAD). However, little has been reported concerning the ear canal microbiota despite the fact that otitis externa is a common problem in dogs with cAD. HYP…	N	X					N	X					N
519	Ovid MEDLINE(R)	Use of antipruritic and rehydrating foams on localized lesions of atopic dermatitis in dogs: a small-scale pilot and comparative double-blinded study.	Veterinary Dermatology. 29(5):446-e150, 2018 Oct.	Comparative Study Journal Article Randomized Controlled Trial	2018	English	Click here for full text options	BACKGROUND: There is a lack of controlled studies evaluating the efficacy of topical nonsteroidal agents for the treatment of canine atopic dermatitis (cAD). HYPOTHESIS/OBJECTIVES: To compare the clinical efficacy of a commercial foam product (mousse), previously demonstrated to be effective in cAD (Foam A) with a foam/mousse containing components from plant extracts (Foam B). ANIMALS: Eight clie…	N	X					N	X					N
520	Ovid MEDLINE(R)	Efficacy of a dinotefuran, pyriproxyfen and permethrin combination product against Ctenocephalides felis felis (Bouche, 1835) (Siphonaptera: Pulicidae) on artificially infested rabbits.	Veterinary Parasitology. 259:74-79, 2018 Aug 15.	Evaluation Study Journal Article	2018	English	Click here for full text options	The aim of this study was to evaluate the efficacy of an insecticidal product in rabbits that combines the neonicotinoid dinotefuran with the pyrethroid permethrin plus the insect growth regulator pyriproxyfen. Adult New Zealand rabbits (n=12) were infested with Ctenocephalides felis felis (50 males and 50 females per rabbit) at days -7, -2, +5, +12 and +19. The control group (n=6) received no tr…	N	X					N	X	X				N
521	Ovid MEDLINE(R)	Progress in formulation development and sterilisation of freeze-dried oligodeoxynucleotide-loaded gelatine nanoparticles.	European Journal of Pharmaceutics & Biopharmaceutics. 129:10-20, 2018 Aug.	Journal Article	2018	English	Click here for full text options	Oligodeoxynucleotide (ODN)-loaded gelatine nanoparticles (GNPs) have proven their outstanding potential in the treatment of allergic diseases such as equine asthma and canine atopic dermatitis, which are appropriate models for the corresponding human diseases. To encourage the development of a marketable product, long term stability and sterility needs to be ensured. In this work, we aimed to adv…	N	X					N	X					N
522	Ovid MEDLINE(R)	[Atopic keratoconjunctivitis: One allergy may mask another. A clinical observation with two types of hypersensitivity reactions: IgE-mediated and non-IgE-mediated]. [French]	Journal Francais d Opthalmologie. 41(3):224-230, 2018 Mar.	Case Reports Journal Article	2018	French	Click here for full text options	Allergies are frequently implicated in ophthalmologic practice. These typically benign allergies can be potentially severe for the ocular surface and have an impact in everyday life. We relate, through a case of keratoconjunctivitis involving 2 types of hypersensitivity, the various triggers and therapeutic choices to allow a more effective treatment. Copyright © 2018 Elsevier Masson SAS. All rig…	Y						Y						Y	N	X	X				N	X					N
523	Ovid MEDLINE(R)	Established and novel approaches for teaching and learning of veterinary parasitology in Berlin.	Veterinary Parasitology. 252:58-61, 2018 Mar 15.	Journal Article	2018	English	Click here for full text options	The teaching of veterinary parasitology to the large number of students at the Freie Universitat Berlin is mainly limited to conventional face-to-face lectures, supplemented by practical classes. Extensive parasite descriptions and diagnostic techniques are at the core of the practical classes, which are also intended to emphasise key biological and veterinary aspects covered in lectures. Further…	N	X					N	X					N
524	Ovid MEDLINE(R)	A preliminary study of serum IgE against cross-reactive carbohydrate determinants (CCD) in client-owned atopic dogs.	Veterinary Dermatology. 29(3):243-e90, 2018 Jun.	Journal Article	2018	English	10.1111/vde.12529	BACKGROUND: Cross-reactive carbohydrate determinants (CCD) are defined carbohydrate portions of glycoprotein cell surface molecules common to many plant and insect species. Mammalian species recognize CCD as foreign antigens and can mount humoral immune responses against them. Approximately 20-37% of grass and venom allergic people possess circulating IgE against CCD; these antibodies are general…	Y						Y						Y	Y						Y						Y	Y						N	X						N
525	Ovid MEDLINE(R)	Evaluation on the effects of 0.1% Peumus boldus leaf and Spiraea ulmaria plant extract combination on bacterial colonization in canine atopic dermatitis: A preliminary randomized, placebo controlled, double-blinded study.	Research in Veterinary Science. 118:164-170, 2018 Jun.	Clinical Trial, Veterinary Journal Article	2018	English	Click here for full text options	Defective skin barrier characterize canine atopic dermatitis (AD). Pyoderma is the most common complication. Herbal compounds have been suggested as alternatives to control bacterial colonization for their effect on natural antimicrobial peptides (AMPs). This study evaluated the effects of 0.1% Peumus boldus leaf and Spiraea ulmaria plant extract combination on clinical signs, bacterial colonizat…	N	X					N	X					N
526	Ovid MEDLINE(R)	Single blinded, randomized, placebo-controlled study on the effects of ciclosporin on cutaneous barrier function and immunological response in atopic beagles.	Veterinary Immunology & Immunopathology. 197:93-101, 2018 Mar.	Clinical Trial, Veterinary Journal Article	2018	English	Click here for full text options	Ciclosporin (CsA) is a common treatment for canine atopic dermatitis (cAD). cAD is a very common skin disease with a multifactorial pathogenesis due to complex interactions between the host and the environment. The purpose of this study was to describe the physical and immunological effects of CsA in cAD using a canine model of AD. Fourteen beagles were enrolled; seven received CsA orally every 2…	N	X					N	X					N
527	Ovid MEDLINE(R)	Exposure to dogs but not cats is associated to a decrease in the prevalence in atopic dermatitis amongst school-children.	Allergologia et Immunopathologia. 46(5):431-437, 2018 Sep - Oct.	Journal Article	2018	English	Click here for full text options	INTRODUCTION: The association regarding the exposure to pets, especially cats and dogs, and the prevalence of allergic diseases is inconsistent. OBJECTIVE: We analyzed the role played by early exposure to dogs or cats in the prevalence of allergic diseases amongst school-aged children. METHOD: Through a cross-sectional study, we examined 756 children, aged 6-7; these candidates were selected thro…	N	X					N	X	X				N
528	Ovid MEDLINE(R)	Histological and Immunological Description of the Leishmanin Skin Test in Ibizan Hounds.	Journal of Comparative Pathology. 158:56-65, 2018 Jan.	Journal Article	2018	English	Click here for full text options	The leishmanin skin test (LST), a delayed-type hypersensitivity (DTH) reaction to Leishmania infantum, can specifically identify dogs that have made a cell-mediated immune response to L. infantum infection. The Ibizan hound appears to be more resistant to L. infantum infection than other breeds of dog. The aim of this study was to describe the histological and immunohistochemical changes induced …	N	X					N	X					N
529	Ovid MEDLINE(R)	Vitamin D shows in vivo efficacy in a placebo-controlled, double-blinded, randomised clinical trial on canine atopic dermatitis.	Veterinary Record. 182(14):406, 2018 04 07.	Journal Article Randomized Controlled Trial	2018	English	Click here for full text options	Atopic dermatitis (AD) in dogs is among the most common skin diseases in small animal practice. It is an inflammatory disease based on a genetic predisposition to develop hypersensitivity against environmental and food allergens and typical clinical signs up exposure. Treatment sometimes can be difficult and associated with adverse effects. Previous studies evaluating cholecalciferol as treatment…	N	X					N	X					N
530	Ovid MEDLINE(R)	Risk Factors for Food Allergy in Early Adolescence: The SchoolNuts Study.	The Journal of Allergy & Clinical Immunology in Practice. 6(2):496-505, 2018 Mar - Apr.	Journal Article Research Support, Non-U.S. Gov't	2018	English	Click here for full text options	BACKGROUND: Despite the rising rates of anaphylaxis in older children and adolescents, risk factors for food allergy among this age group are understudied. OBJECTIVE: The objective of this study was to investigate the risk factors for current adolescent food allergy using a population-based sample. METHODS: The SchoolNuts study was a questionnaire survey among 10- to 14-year-old adolescents and t…	N	X					N	X	X				N
531	Ovid MEDLINE(R)	A study to evaluate the primary causes associated with Pseudomonas otitis in 60 dogs.	Journal of Small Animal Practice. 59(4):238-242, 2018 Apr.	Journal Article	2018	English	Click here for full text options	OBJECTIVES: To evaluate the primary causes, age of onset and time from diagnosis of otitis to development of Pseudomonas otitis in each case. MATERIALS AND METHODS: Data from clinical records of 60 dogs were extracted to address the study objectives. Pseudomonas otitis was diagnosed by clinical signs and positive culture. RESULTS: In total, 57 purebred dogs and three crossbreed dogs were included…	N	X					N	X					N
532	Ovid MEDLINE(R)	Percutaneous prick test irritant threshold concentrations for eight allergens in healthy nonsedated dogs in the USA.	Veterinary Dermatology. 29(2):117-e47, 2018 Apr.	Journal Article	2018	English	10.1111/vde.12514	BACKGROUND: Percutaneous testing (PT) is preferred to intradermal testing in humans for the in vivo identification of allergen hypersensitivity, but the methodology has not been well described for use in dogs with atopic dermatitis. HYPOTHESIS/OBJECTIVES: To identify the irritant threshold concentrations (ITC) of eight aeroallergens using a commercial prick test device in normal dogs. ANIMALS: Tw…	Y						N	X					Y	Y						Y						Y	Y						N	X						N
533	Ovid MEDLINE(R)	Control of canine idiopathic nasal hyperkeratosis with a natural skin restorative balm: a randomized double-blind placebo-controlled study.	Veterinary Dermatology. 29(2):134-e53, 2018 Apr.	Clinical Trial Journal Article Randomized Controlled Trial	2018	English	Click here for full text options	BACKGROUND: Nasal hyperkeratosis may cause discomfort in dogs by predisposing them to fissures and secondary bacterial infection. Approaches to treatment have been described anecdotally; the effectiveness of such therapies remains unproven. HYPOTHESIS/OBJECTIVES: To investigate the efficacy of a balm containing essential oils and essential fatty acids in dogs with idiopathic nasal hyperkeratosis.…	N	X					N	X					N
534	Ovid MEDLINE(R)	Investigation of the correlation of serum IL-31 with severity of dermatitis in an experimental model of canine atopic dermatitis using beagle dogs.	Veterinary Dermatology. 29(1):69-e28, 2018 Feb.	Journal Article	2018	English	Click here for full text options	BACKGROUND: IL-31 is a cytokine that is believed to play an important role in atopic dermatitis (AD). IL-31 levels positively correlate with disease severity in children with AD. Currently, there is no study that has investigated such a correlation in atopic dogs. HYPOTHESIS/OBJECTIVE: The purpose of this study was to evaluate the correlation between IL-31 serum levels and severity of dermatitis.…	N	X					N	X					N
535	Ovid MEDLINE(R)	A novel non-azole topical treatment reduces Malassezia numbers and associated dermatitis: a short term prospective, randomized, blinded and placebo-controlled trial in naturally infected dogs.	Veterinary Dermatology. 29(1):14-e7, 2018 Feb.	Journal Article Randomized Controlled Trial	2018	English	Click here for full text options	BACKGROUND: Malassezia yeast overgrowth on the skin is a common and often recurrent cause of dermatitis in dogs; it can be an exacerbating factor of atopic dermatitis. Anti-fungal drugs have been a standard treatment, but there is some concern that resistance may be evolving in a spectrum of Malassezia species. Safe, efficient and easy-to-use alternatives are needed. OBJECTIVES: To assess if a co…	N	X					N	X					N
536	Ovid MEDLINE(R)	Evaluation of the correlation between Scoring Feline Allergic Dermatitis and Feline Extent and Severity Index and skin hydration in atopic cats.	Veterinary Dermatology. 29(1):34-e16, 2018 Feb.	Journal Article	2018	English	Click here for full text options	BACKGROUND: Evaluation of the severity of clinical signs of cats with allergic skin diseases has used two scoring systems: Scoring Feline Allergic Dermatitis (SCORFAD) and the Feline Extent and Severity Index (FeDESI). The integrity of the cutaneous barrier can also be evaluated by measuring skin hydration. A correlation between the clinical score and skin hydration has been observed in humans an…	N		X				N	X	X				N
537	Ovid MEDLINE(R)	Symptoms of allergic rhinitis in Parakou, Benin: Prevalence, severity and associated factors.	European annals of otorhinolaryngology, head & neck diseases. 135(1):33-36, 2018 Feb.	Journal Article	2018	English	Click here for full text options	AIMS: Allergic rhinitis (AR) is an extremely common disease. This study aimed to determine the prevalence and severity of AR symptoms and potential associated factors, in Parakou, a city in Benin. MATERIALS AND METHODS: A cross-sectional study was conducted between April and July 2016, involving inhabitants of the city aged between 6 and 65 years. Cluster sampling was carried out. AR symptoms wer…	N		X				N	X	X				N
538	Ovid MEDLINE(R)	Emerging role of interleukin-31 and interleukin-31 receptor in pruritus in atopic dermatitis. [Review]	Allergy. 73(1):29-36, 2018 Jan.	Journal Article Review	2018	English	Click here for full text options	Atopic dermatitis (AD) is a chronic or chronically relapsing, eczematous, severely pruritic skin disorder associated with skin barrier dysfunction. The lesional skin of AD exhibits T helper 2 (TH 2)-deviated immune reactions. Interleukin-31 (IL-31), preferentially produced from TH 2 cells, is a potent pruritogenic cytokine, and its systemic and local administration induces scratching behavior in …	N			X			N	X		X			N
539	Ovid MEDLINE(R)	Increasing Prevalence of the Sensitization to Cat/Dog Allergens in Korea.	Annals of Dermatology. 30(6):662-667, 2018 Dec.	Journal Article	2018	English	Click here for full text options	BACKGROUND: Recently, the number of domestic pets has increased. As a consequence, sensitization to animal allergens, such as cat or dog allergens, has become a problem. OBJECTIVE: We studied the annual trends of sensitization to cats or dogs, and the characteristics of the patients. METHODS: We retrospectively analyzed the medical records of 7,469 patients who visited a dermatology clinic and un…	N		X				N	X	X				N
540	Ovid MEDLINE(R)	Comparative study to evaluate the voluntary acceptance of two liquid oral formulations of ciclosporin in dogs.	Irish Veterinary Journal. 71:27, 2018.	Journal Article	2018	English	Click here for full text options	BACKGROUND: The purpose of this study was to determine and compare the voluntary acceptance of two oral liquid formulations of ciclosporin, investigational Atopica R oral solution (Elanco Animal Health) and Cyclavance R Oral Solution (Virbac), when given orally via syringe or offered freely after mixing with food to dogs.Twenty-five adult mixed breed dogs were selected for this two-phase study. I…	N	X					N	X					N
541	Ovid MEDLINE(R)	Prevalence, Risk Factors and Cutoff Values for Bronchial Hyperresponsiveness to Provocholine in 7-Year-Old Children.	Allergy, asthma & immunology research. 10(5):466-477, 2018 Sep.	Journal Article	2018	English	Click here for full text options	BACKGROUND: A US Food and Drug Administration (FDA)-approved drug methacholine chloride (Provocholine R) was recently introduced to Korea where it is now widely used in clinical practice. We aimed to evaluate the prevalence, risk factors and cutoff value of bronchial hyperresponsiveness (BHR) to Provocholine in 7-year-old children. METHODS: Six hundred and thirty-three children from the Panel Stu…	N		X				N	X	X				N
542	Ovid MEDLINE(R)	Skin prick test reactivity to aeroallergens in adult allergy clinic in Thailand: a 12-year retrospective study.	Asia Pacific Allergy. 8(2):e17, 2018 Apr.	Journal Article	2018	English	Click here for full text options	BACKGROUND: The global prevalence of allergic rhinitis, asthma, and atopic dermatitis has risen significantly over the last 2 decades. Allergic sensitization to aeroallergen is a major risk factor in developing the allergic disease. The prevalence of aeroallergen sensitization varies in different regions and countries. OBJECTIVE: To determine the prevalence of common aeroallergen sensitization an…	N		X				N	X	X				N
543	Ovid MEDLINE(R)	Hair and saliva analysis fails to accurately identify atopic dogs or differentiate real and fake samples.	Veterinary Dermatology. 2019 Jan 24	Journal Article	2019	English	10.1111/vde.12716	BACKGROUND: The availability of direct-to-consumer medical testing for human and veterinary health conditions has increased in recent years. For allergies, several companies market proprietary hair and saliva tests directly to pet owners. These tests have not been validated and there is limited regulatory oversight for such tests in veterinary medicine. HYPOTHESIS/OBJECTIVES: To examine the accur…	Y						Y						Y	Y						N	X					Y	Y						N	X						N
544	Ovid MEDLINE(R)	Pilot study using five methods to evaluate skin barrier function in healthy dogs and in dogs with atopic dermatitis.	Veterinary Dermatology. 2019 Jan 15	Journal Article	2019	English	10.1111/vde.12723	BACKGROUND: Atopic dermatitis is associated with skin barrier defects. In people, noninvasive techniques are used to quantify the skin barrier functionality. In dogs, transepidermal water loss (TEWL), stratum corneum hydration and pH have been used to assess skin barrier function. However, few studies have determined their repeatability. OBJECTIVE: To assess the repeatability of measurements of s…	Y						Y						Y	Y						Y						Y	Y						N	X						N
545	Ovid MEDLINE(R)	Double blinded, vehicle controlled, crossover study on the efficacy of a topical endocannabinoid membrane transporter inhibitor in atopic Beagles.	Archives of Dermatological Research. 311(10):795-800, 2019 Dec.	Journal Article	2019	English	Click here for full text options	The endocannabinoid system is important for skin homeostasis and alterations are linked to inflammatory diseases like atopic dermatitis (AD). Importantly, activation of cannabinoid receptor CB2 decreases pruritus and inflammation in mouse models. Reduction of inactivation of endogenous cannabinoids could, therefore, be a therapeutic option for AD. Dogs spontaneously develop AD, which closely mimi…	N	X					N	X					N
546	Ovid MEDLINE(R)	Critically Appraised Topic on Adverse Food Reactions of Companion Animals (8): Storage Mites in Commercial Pet foods. [Review]	BMC Veterinary Research [Electronic Resource]. 15(1):385, 2019 Oct 31.	Journal Article Review	2019	English	Click here for full text options	BACKGROUND: Dogs with year-round atopic dermatitis are often sensitized to Dermatophagoides house dust mites (HDM). Storage mites (SM) are known to grow on cereal-rich foods. Tyrophagus SM can exacerbate clinical signs of allergy in laboratory dogs sensitized to HDM. Consequently, atopic dogs with high-levels of HDM-specific IgE are likely to have a flare of signs after eating a food contaminated…	N			X			N	X		X			N
547	Ovid MEDLINE(R)	Intradermal reactivity to two concentrations of pollen extracts in atopic dogs.	Veterinary Dermatology. 30(6):503-e151, 2019 Dec.	Journal Article	2019	English	Click here for full text options	BACKGROUND: Intradermal test (IDT) is used widely for determination of allergens to include in allergen-specific immunotherapy (AIT). The optimal concentration of allergen solutions used for testing has not been established in atopic dogs. Inadequate concentrations could lead to falsely negative test results and lack of inclusion of important allergens in AIT. HYPOTHESIS/OBJECTIVES: To compare ID…	Y						Y						Y	Y						Y						Y	Y						Y							Y
548	Ovid MEDLINE(R)	Serum IgE against cross-reactive carbohydrate determinants (CCD) in healthy and atopic dogs.	Veterinary Dermatology. 30(6):507-e153, 2019 Dec.	Comparative Study Journal Article	2019	English	10.1111/vde.12799	BACKGROUND: Cross-reactive carbohydrate determinants (CCD) are Immunoglobulin E (IgE)-binding carbohydrate structures common to plant and insect species. In people, anti-CCD IgE is thought to be clinically irrelevant, but to have the potential to confound serological IgE test interpretations. Previous studies reported the detection of anti-CCD IgE in 24-73% of atopic dog sera; prevalence in healt…	Y						Y						Y	Y						Y						Y	Y						N	X						N
549	Ovid MEDLINE(R)	The usefulness of short-course prednisolone during the initial phase of an elimination diet trial in dogs with food-induced atopic dermatitis.	Veterinary Dermatology. 30(6):498-e149, 2019 Dec.	Clinical Trial, Veterinary Journal Article	2019	English	Click here for full text options	BACKGROUND: Food allergy is a possible cause of atopic dermatitis (AD) in dogs; it is typically diagnosed following an eight-week elimination diet trial (EDT) and a provocation with the original diet. This lengthy procedure is difficult for owners and its interpretation may be unclear. HYPOTHESIS/OBJECTIVES: To test the effect of prednisolone used in the first weeks of an EDT in order to reduce t…	N	X					N	X					N
550	Ovid MEDLINE(R)	Antivenin-associated serum sickness in a dog.	Journal of veterinary emergency & critical care. 29(5):558-563, 2019 Sep.	Case Reports	2019	English	Click here for full text options	OBJECTIVE: To describe a case of documented serum sickness in a dog following administration of a single dose of a novel antivenin crotalidae polyvalent. CASE SUMMARY: A 4-year-old female neutered mixed breed dog developed recurrent signs of hypersensitivity (swelling, edema, urticaria/hives, gastrointestinal signs, vasculitis) at 1 and 2 weeks following administration of a single unit of a novel…	N	X					N	X					N
551	Ovid MEDLINE(R)	Phosphodiesterase 4D, miR-203 and selected cytokines in the peripheral blood are associated with canine atopic dermatitis.	PLoS ONE [Electronic Resource]. 14(6):e0218670, 2019.	Journal Article Research Support, Non-U.S. Gov't	2019	English	10.1371/journal.pone.0218670	Canine Atopic Dermatitis (AD) is a common complex and multifactorial disease involving immune dysregulation, genetic predisposition, skin barrier defects, environmental factors and allergic sensitization. To date, diagnosis of canine AD relies on a combination of patient history, clinical examination, allergy testing and response to diet trials/therapies with no reliable biomarkers available to d…	N	X					Y						Y	N	X					N	X					N
552	Ovid MEDLINE(R)	Alterations in circulating concentrations of IL-17, IL-31 and total IgE in dogs with atopic dermatitis.	Veterinary Dermatology. 30(5):383-e114, 2019 Oct.	Journal Article	2019	English	10.1111/vde.12762	BACKGROUND: The pathogenesis of canine atopic dermatitis (AD) is complex. Dysregulation of the cutaneous immune system is considered an important regulator of the allergic response. Exploration of association of interleukin-17 (IL-17), IL-31, IgE and leukogram attributes with canine AD could provide novel insights into its immunopathology. HYPOTHESIS/OBJECTIVES: To investigate possible associatio…	Y						Y						Y	N	X					N	X					N
553	Ovid MEDLINE(R)	Allergic sensitization among Danish infants at 13 months of age.	Immunity, Inflammation and Disease. 7(3):183-190, 2019 09.	Journal Article Multicenter Study Randomized Controlled Trial Research Support, Non-U.S. Gov't	2019	English	Click here for full text options	BACKGROUND: Sensitization means elevated number of specific immunoglobulin E, either measured by skin prick test or in blood samples. Sensitization is associated with, but not synonymous with, allergic disease. METHODS: The Danish Calmette Study was conducted from 2012 to 2015 at three Danish hospitals, with the aim of exploring nonspecific effects of neonatal Bacillus Calmette-Guerin vaccination…	N		X				N	X	X				N
554	Ovid MEDLINE(R)	Dog ownership at three months of age is associated with protection against food allergy.	Allergy. 74(11):2212-2219, 2019 11.	Journal Article Randomized Controlled Trial Research Support, Non-U.S. Gov't	2019	English	Click here for full text options	BACKGROUND: The prevention of food allergy is a key priority for reducing the burden of allergic disease. Environmental exposures modulate the risk of developing food allergy and some of this may be mediated by the infants' developing microbiome. However, the role of potentially protective environmental exposures, such as pet ownership, is largely uninvestigated with respect to food allergy. METH…	N	X					N	X	X				N
555	Ovid MEDLINE(R)	Update on pathogenesis, diagnosis, and treatment of atopic dermatitis in dogs. [Review]	Journal of the American Veterinary Medical Association. 254(11):1291-1300, 2019 Jun 01.	Journal Article Review	2019	English	Click here for full text options	Improved understanding of the pathogenesis of atopic dermatitis in dogs has led to more effective treatment plans, including skin barrier repair and new targeted treatments for management of allergy-associated itch and inflammation. The intent of this review article is to provide an update on the etiologic rationale behind current recommendations that emphasize a multimodal approach for the manag…	N			X			N			X			N
556	Ovid MEDLINE(R)	Skin and ear health in a group of English bulldogs in Finland - a descriptive study with special reference to owner perceptions.	Veterinary Dermatology. 30(4):307-e85, 2019 Aug.	Journal Article	2019	English	Click here for full text options	BACKGROUND: Dermatological conditions are common in English bulldogs (EBs). HYPOTHESIS/OBJECTIVES: This cross-sectional study describes the dermatological health status of a group of EBs and compares the results with owner perceptions and its possible impact on quality of life (QoL). Computed tomographic (CT) findings of the ear canals were compared between EBs and mesaticephalic dogs. ANIMALS: T…	N	X					N	X					N
557	Ovid MEDLINE(R)	Agreement of serum allergen test results with unblocked and blocked IgE against cross-reactive carbohydrate determinants (CCD) and intradermal test results in atopic dogs.	Veterinary Dermatology. 30(3):195-e61, 2019 Jun.	Comparative Study Journal Article	2019	English	10.1111/vde.12742	BACKGROUND: Tests for allergen-specific immunoglobulin E (IgE) are used to select allergens for immunotherapy in atopic dogs. Antibodies against cross-reactive carbohydrate determinants (anti-CCD IgE) have been identified in serum samples of atopic dogs. Their presence in humans is a known cause of clinically irrelevant polysensitization to plant allergens. OBJECTIVES: To compare the results of a…	Y						Y						Y	Y						Y						Y	Y						N	X						N
558	Ovid MEDLINE(R)	Intralaboratory Reliability and Variability for Allergen-Specific Immunoglobulin Type E Serology Testing.	Journal of the American Animal Hospital Association. 55(3):124-129, 2019 May/Jun.	Journal Article	2019	English	10.5326/JAAHA-MS-6761	Atopic dermatitis is a very common condition affecting dogs and often managed with allergen-specific immunotherapy, which requires accurate identification of causative allergens. Serology testing is used commonly. Serum was collected from 35 atopic dogs and separated into three samples each (1, 2, and 3). Samples 1 and 2 were sent to IDEXX Laboratories the same day; sample 3 was stored at -80degr…	Y						N	X					Y	Y						Y						Y	Y						N	X						Y
559	Ovid MEDLINE(R)	Blepharitis in dogs: a clinical evaluation in 102 dogs.	Veterinary Dermatology. 30(3):222-e69, 2019 Jun.	Journal Article	2019	English	Click here for full text options	BACKGROUND: Blepharitis is a common finding in many dogs with various skin diseases. OBJECTIVES: To establish a definition for canine blepharitis versus periocular dermatitis (POD), to evaluate the clinical findings and underlying skin diseases of blepharitis, and to document the effects of blepharitis on tear production in dogs. ANIMALS: One hundred and two privately owned dogs with clinical sig…	N	X					N	X					N
560	Ovid MEDLINE(R)	Reliability of different sets of criteria in diagnosing canine atopic dermatitis applied to a population of 250 dogs seen in a veterinary teaching hospital.	Veterinary Dermatology. 30(3):188-e59, 2019 Jun.	Journal Article	2019	English	10.1111/vde.12729	BACKGROUND: Different sets of criteria are available in veterinary dermatology for the diagnosis of canine atopic dermatitis (cAD); there are limited data to assess their reliability. HYPOTHESIS/OBJECTIVES: The aim of this study was to assess the discriminative and predictive ability of four sets in diagnosing cAD in a population of dogs with different skin diseases. ANIMALS: Two hundred and fift…	Y						Y						Y	N	X					Y						Y	N						N	X						N
561	Ovid MEDLINE(R)	Testing for food-specific antibodies in saliva and blood of food allergic and healthy dogs.	Veterinary Journal. 245:1-6, 2019 03.	Journal Article	2019	English	Click here for full text options	An elimination diet (ED) followed by re-challenge has been the reference standard to diagnose adverse food reactions (AFR) in dogs, but can be challenging to conduct. This study investigated the accuracy of a saliva-based test for food-specific IgA and IgM and an ELISA serum test for food-specific IgE. Three groups of dogs were tested. Group 1 (n=11) included dogs with previously diagnosed and co…	Y						N	X					Y	N	X					N	X					N
562	Ovid MEDLINE(R)	Development and validation of a new standardised data collection tool to aid in the diagnosis of canine skin allergies.	Scientific Reports. 9(1):3039, 2019 02 28.	Journal Article Research Support, Non-U.S. Gov't Validation Study	2019	English	Click here for full text options	Canine atopic dermatitis (cAD) is a common hereditary clinical syndrome in domestic dogs with no definitive diagnostic tests, which causes marked morbidity and has a high economic impact internationally. We created a novel questionnaire for Labrador (LR) and Golden retriever (GR) owners to evaluate canine skin health with respect to clinical signs of cAD. 4,111 dogs had fully completed questionna…	Y						N	X					Y	N	X					N	X					N
563	Ovid MEDLINE(R)	A double-blind, placebo-controlled evaluation of orally administered heat-killed Enterococcus faecalis FK-23 preparation in atopic dogs.	Veterinary Dermatology. 30(2):127-e36, 2019 Apr.	Clinical Trial, Veterinary Evaluation Study Journal Article Multicenter Study	2019	English	Click here for full text options	BACKGROUND: Gastrointestinal microbiome modulation is reported to be an effective therapy to reduce the clinical signs of canine atopic dermatitis (cAD). The killed strain of Enterococcus faecalis FK-23 has been shown to reduce allergic responses in mice and people. HYPOTHESIS/OBJECTIVE: The aim of this multicentre, double-blinded, placebo-controlled study was to evaluate the safety and efficacy …	N	X					N	X					N
564	Ovid MEDLINE(R)	Could we use the erythema grading of the CADESI4 as a simple instrument for future short-duration clinical trials of dogs with atopic dermatitis?.	Veterinary Dermatology. 30(1):80-81, 2019 02.	Letter	2019	English	https://doi-org.udea.lookproxy.com/10.1111/vde.12709	Letter to Editor	Y						N	X					Y	N	X		X			N	X					N
565	Ovid MEDLINE(R)	Comparison of demographic data, disease severity and response to treatment, between dogs with atopic dermatitis and atopic-like dermatitis: a retrospective study.	Veterinary Dermatology. 30(1):10-e4, 2019 Feb.	Journal Article	2019	English	10.1111/vde.12708	BACKGROUND: Limited information is available describing the features of canine atopic-like dermatitis (ALD) compared with atopic dermatitis (AD). OBJECTIVES: To compare demographic data, disease severity and response to therapy between ALD and AD dogs. ANIMALS: Two hundred and fifty-three atopic dogs with intradermal and serum allergen-specific IgE test results were selected retrospectively. METH…	Y						N	X					Y	Y	X					Y						Y	N						N	X						N
566	Ovid MEDLINE(R)	Allergen-specific IgE in nonatopic dogs.	Veterinary Dermatology. 30(1):78-79, 2019 02.	Letter	2019	English	Click here for full text options	Letter to the Editor	Y						N	X					Y	N	X		X			N	X					N
567	Ovid MEDLINE(R)	Canine Acute Eosinophilic Dermatitis with Edema (Wells-Like Syndrome). [Review]	Veterinary Clinics of North America - Small Animal Practice. 49(1):47-51, 2019 Jan.	Journal Article Review	2019	English	Click here for full text options	Canine acute eosinophilic dermatitis with edema is an uncommon syndromic disorder in dogs with a unique clinical presentation. Most but not all dogs have a history of gastrointestinal upset preceding or concomitant with skin lesion onset. Affected dogs present with macular to generalized erythema that is most evident on the glabrous skin of the abdomen. Although the etiology is not known, an adve…	N			X			N	X		X			N
568	Ovid MEDLINE(R)	Diagnosis and Treatment of Canine Acral Lick Dermatitis. [Review]	Veterinary Clinics of North America - Small Animal Practice. 49(1):105-123, 2019 Jan.	Journal Article Review	2019	English	Click here for full text options	Acral lick dermatitis is a common, frustrating disease. It is characterized by incessant licking behavior resulting in raised, thickened, ulcerative plaques, most commonly affecting the lower extremities of dogs. Underlying primary diseases, such as allergic disorders (atopic dermatitis, food allergy, flea allergy), orthopedic or neurologic disorders, parasitic diseases (eg, demodicosis), infecti…	N			X			N	X		X			N
569	Ovid MEDLINE(R)	Multidose intramuscular allogeneic adipose stem cells decrease the severity of canine atopic dermatitis: A pilot study.	Veterinary World. 12(11):1747-1754, 2019 Nov.	Journal Article	2019	English	Click here for full text options	AIM: The aim of this pilot study was to evaluate the therapeutic and safety performance of an intramuscular treatment protocol of multidose of allogeneic adipose stem cells (ASCs) isolated, characterized, and expanded ex vivo from a healthy canine donor. MATERIALS AND METHODS: Twelve dogs diagnosed with canine atopic dermatitis (CAD) were intramuscularly treated with 0.5x106 of cryopreserved ASCs…	N	X					N	X					N
570	Ovid MEDLINE(R)	Evaluation of Skin Prick-Test Reactions for Allergic Sensitization in Dogs With Clinical Symptoms Compatible With Atopic Dermatitis. A Pilot Study.	Frontiers in Veterinary Science. 6:448, 2019.	Journal Article	2019	English	10.3389/fvets.2019.00448	Skin prick-test is the first choice for the detection of type I hypersensitivity in human atopic dermatitis. Canine atopic dermatitis resembles several symptoms of the disease in the human counterpart. In canine atopic dermatitis, intradermal testing is the test of choice, and there are few reports on the use of skin prick test (SPT) in dogs. The purpose of this study was to evaluate SPT reaction…	Y						Y						Y	Y						Y						Y	Y						Y							Y
571	Ovid MEDLINE(R)	Behavioural Differences in Dogs with Atopic Dermatitis Suggest Stress Could Be a Significant Problem Associated with Chronic Pruritus.	Animals [Electronic Resource]. 9(10), 2019 Oct 16.	Journal Article	2019	English	Click here for full text options	Canine atopic dermatitis (cAD) is a common allergic skin condition in dogs that causes chronic pruritus. The overall quality of life in dogs with cAD is known to be reduced, and human patients with pruritic conditions report significant psychological burdens from pruritus-induced stress, and atopic dermatitis is associated with significant psychopathological morbidities. We tested the hypothesis …	N	X					N	X					N
572	Ovid MEDLINE(R)	Comparing the results of intradermal skin tests for four dust mite allergens in dogs with atopic dermatitis in Thailand.	Veterinary World. 13(11):2381-2387, 2020 Nov.	Journal Article	2020	English	10.14202/vetworld.2020.2381-2387	BACKGROUND AND AIM: Hypersensitivity to house dust mites is a common cause of atopic dermatitis in dogs. The intradermal test (IDT) identifies allergens to be included in allergen-specific immunotherapy. Common mite allergens used for IDT include single source extracts obtained from Dermatophagoides farinae or Dermatophagoides pteronyssinus or multisource extracts from multimite species (mixed mi…	Y						Y						Y	Y						Y						Y	Y						Y							Y
573	Ovid MEDLINE(R)	IgE recognition profile of aeroallergen components in young children sensitized to dogs.	Asia Pacific Allergy. 10(3):e33, 2020 Jul.	Journal Article	2020	English	Click here for full text options	BACKGROUND: Pet ownership is increasing rapidly and as growing numbers of dogs in household, clinicians are facing more allergic patients and so as in young children. OBJECTIVE: This study aims to profile the IgE recognition patterns to aeroallergen components in young children sensitized to dogs. METHODS: Through retrospective chart reviews, we evaluated the clinical, environmental, and laborato…	N		X				N	X	X				N
574	Ovid MEDLINE(R)	Early Life Domestic Pet Ownership, and the Risk of Pet Sensitization and Atopic Dermatitis in Preschool Children: A Prospective Birth Cohort in Shanghai.	Frontiers in Pediatrics. 8:192, 2020.	Journal Article	2020	English	Click here for full text options	Background: Although domestic pet ownership is on the rise, the impact of early life pet ownership on children's pet sensitization and atopic dermatitis (AD) remains controversial. Methods: Shanghai Allergy Cohort is an ongoing prospective study followed up to the age of 5 years. Pregnant mothers were recruited and their offspring were followed up every year by a group of pediatricians. Informati…	N		X				N	X	X				N
575	Ovid MEDLINE(R)	A descriptive study of allergen-specific IgE serological tests for canine atopic dermatitis in Thailand.	BMC Veterinary Research [Electronic Resource]. 16(1):475, 2020 Dec 07.	Journal Article	2020	English	10.1186/s12917-020-02684-x	BACKGROUND: This study describes the usefulness of allergen-specific Immunoglobulin E (IgE) serology (ASIS) for identifying allergens in dogs with atopic dermatitis. ASIS tests were conducted in 23 dogs diagnosed with atopic dermatitis for indoor allergens (yeast and mites), outdoor allergens (grass pollen, weed pollen, and tree pollen), and fleas. The relationship among positive ASIS tests were …	Y						Y						Y	Y						Y						Y	Y						Y							Y
576	Ovid MEDLINE(R)	Serum canine thymus and activation-regulated chemokine (TARC/CCL17) concentrations correlate with disease severity and therapeutic responses in dogs with atopic dermatitis.	Veterinary Dermatology. 31(6):446-455, 2020 Dec.	Journal Article	2020	English	10.1111/vde.12894	BACKGROUND: Thymus and activation-regulated chemokine (TARC/CCL17) has been implicated in the pathogenesis of canine atopic dermatitis (cAD). Serum TARC concentrations are a reliable biomarker for human atopic dermatitis; however, their potential as a biomarker for cAD has not been investigated. HYPOTHESIS/OBJECTIVES: To investigate whether serum TARC concentrations correlate with disease severit…	Y						Y						Y	Y						Y						Y	Y						N	X						N
577	Ovid MEDLINE(R)	Immunoreactive cutaneous sporotrichosis.	Anais Brasileiros de Dermatologia. 95(6):737-739, 2020 Nov - Dec.	Case Reports	2020	English	Click here for full text options	Sporothrix spp. infection can occur through the inoculation of the organism in the skin through direct contact with the soil (sapronotic infection), through contact with animals, such as infected cats and dogs (zoonotic infection), or less frequently via inhalation. With a subacute or chronic evolution, approximately 80% of patients affected by the disease present with the lymphocutaneous form; e…	N	X					N	X					N
578	Ovid MEDLINE(R)	[Effects of a homeopathic medication on clinical signs of canine atopic dermatitis]. [German]	Tierarztliche Praxis. Ausgabe K, Kleintiere/Heimtiere. 48(4):245-248, 2020 Aug.	Journal Article	2020	German	Click here for full text options	OBJECTIVE: A commercially available medication containing homeopathic ingredients showed first signs of success in atopic dermatitis in dogs. The aim of this case series was to evaluate the effect of the preparation in a larger number of dogs with atopic dermatitis. MATERIAL AND METHODS: Ten atopic dogs received the oral homoeopathic combination preparation daily for 3 weeks according to the manu…	N	X					N	X		X			N
579	Ovid MEDLINE(R)	Measurement of serum Interleukin 34 (IL-34) and correlation with severity and pruritus scores in client-owned dogs with atopic dermatitis.	Veterinary Dermatology. 31(5):359-e94, 2020 Oct.	Journal Article	2020	English	10.1111/vde.12873	BACKGROUND: Atopic dermatitis (AD) is a common inflammatory skin disease of dogs. Interleukin (IL)-34 is a monocyte/macrophage growth factor, produced mainly by keratinocytes, that has been implicated in several human inflammatory conditions including human AD. HYPOTHESIS: Canine serum IL-34 concentrations are increased in dogs with AD and correlate with clinical lesion and pruritus scores. ANIMA…	N	X					Y						Y	N	X					N	X					N
580	Ovid MEDLINE(R)	Canine atopic dermatitis: Role of luteolin as new natural treatment.	Veterinary Medicine & Science. 6(4):926-932, 2020 11.	Journal Article	2020	English	Click here for full text options	BACKGROUND: Luteolin has been demonstrated to possess numerous biological effects. However, the effect of luteolin on LPS (Lipopolysaccharides) stimulation in CPEK cells has not been investigated. HYPOTHESIS/OBJECTIVES: An in vitro model of atopic canine dermatitis was used to identify the antioxidant effect of luteolin as a new treatment that is capable of improving the conditions of veterinary …	N	X					N	X					N
581	Ovid MEDLINE(R)	Prevalence and risk factors for asthma, rhinitis, eczema, and atopy among preschool children in an Andean city.	PLoS ONE [Electronic Resource]. 15(7):e0234633, 2020.	Journal Article Research Support, Non-U.S. Gov't	2020	English	Click here for full text options	BACKGROUND: Limited data are available on prevalence and associated risk factors for atopy and allergic diseases from high-altitude urban settings in Latin America. OBJECTIVE: To estimate the prevalence of atopy, asthma, rhinitis, and eczema, and associations with relevant risk factors in preschool children in the Andean city of Cuenca. METHODS: A cross-sectional study was undertaken using a repr…	N		X				N	X	X				N
582	Ovid MEDLINE(R)	IgE sensitivity to Malassezia pachydermatis and mite allergens in dogs with atopic dermatitis.	Veterinary Immunology & Immunopathology. 226:110070, 2020 Aug.	Journal Article	2020	English	10.1016 /j.vetimm.2020.110070	In this study, dogs with atopic dermatitis were separated into non-food-induced atopic dermatitis (NFIAD) group (n = 15) and food-induced atopic dermatitis (FIAD) group (n = 37) based on an elimination diet test. IgE reactivity for crude Malassezia pachydermatis (M. pachydermatis) and house dust mites (HDM) allergen extracts was investigated in the two groups using fluorometric enzyme-linked immu…	Y						Y						Y	Y						Y						Y	N						N	X						N
583	Ovid MEDLINE(R)	Identification of modifiable pre- and postnatal dietary and environmental exposures associated with owner-reported canine atopic dermatitis in Finland using a web-based questionnaire.	PLoS ONE [Electronic Resource]. 15(5):e0225675, 2020.	Journal Article Research Support, Non-U.S. Gov't	2020	English	Click here for full text options	A cross-sectional hypothesis generating study was performed to investigate modifiable exposures such as whether feeding pattern (a non-processed meat based diet, NPMD, or an ultra-processed carbohydrate based diet, UPCD), certain environmental factors and their timing of exposure might be associated with the development of canine atopic dermatitis (CAD). Also, genetic and demographic factors were…	N	X					N	X					N
584	Ovid MEDLINE(R)	Critically appraised topic on adverse food reactions of companion animals (9): time to flare of cutaneous signs after a dietary challenge in dogs and cats with food allergies. [Review]	BMC Veterinary Research [Electronic Resource]. 16(1):158, 2020 May 24.	Journal Article Review	2020	English	Click here for full text options	BACKGROUND: At this time, elimination diets followed by oral food challenges (OFCs) represent the "gold standard" for diagnosing skin-manifesting food allergies (FA) in dogs and cats. Regrettably, there is no clear consensus on how long one should wait for clinical signs to flare after an OFC before diagnosing or ruling-out a FA in a dog or a cat. RESULTS: We searched two databases on October 23,…	N	X					N		X	X			N
585	Ovid MEDLINE(R)	A pilot study to identify perceived barrier and motivating factors of primary veterinarians in the USA for specialty referral and management of atopic dermatitis with allergen-specific immunotherapy.	Veterinary Dermatology. 31(5):371-e98, 2020 Oct.	Journal Article	2020	English	Click here for full text options	BACKGROUND: Allergen-specific immunotherapy (ASIT) may decrease clinical signs and potential neosensitization in dogs with canine atopic dermatitis (cAD). Identification of barriers to referral and specialty level case management may improve clinical outcome and satisfaction for both clients and primary veterinarians. HYPOTHESIS/OBJECTIVES: The objective of this cross-sectional, descriptive, surv…	N	X					N	X					N
586	Ovid MEDLINE(R)	Cytological and microbiological characteristics of middle ear effusions in brachycephalic dogs.	Journal of Veterinary Internal Medicine. 34(4):1454-1463, 2020 Jul.	Journal Article	2020	English	Click here for full text options	BACKGROUND: Middle ear effusion is common in brachycephalic dogs with similarities to otitis media with effusion in children. Association with the cranial and eustachian tube morphology and bacterial infection is suspected in both species. HYPOTHESIS/OBJECTIVES: To determine cytological and bacteriological features of middle ear effusions in dogs, provide information on histological features, and…	N	X					N	X					N
587	Ovid MEDLINE(R)	Rapid response of hyperkeratotic erythema multiforme to oclacitinib in two dogs.	Veterinary Dermatology. 31(4):330-e86, 2020 Aug.	Case Reports Journal Article	2020	English	Click here for full text options	BACKGROUND: Hyperkeratotic erythema multiforme (HKEM) is a clinically distinct dermatosis and poorly characterized syndrome, comprised of hyperkeratotic plaques with variable symmetry and apoptosis similar to "classic" erosive canine EM. Hyperkeratotic EM has a protracted clinical course and, although treatments with glucocorticoids, azathioprine and/or ciclosporin have been tried, rates of remis…	N	X					N	X					N
588	Ovid MEDLINE(R)	Is the presence of a fur animal an exacerbating factor of atopic dermatitis in adults?.	Polski Merkuriusz Lekarski. 48(283):19-22, 2020 Feb 26.	Journal Article	2020	English	Click here for full text options	Atopic dermatitis is one of the most common inflammatory dermatoses in children and adults. To date, no clear relationship between the severity of AD and the exposure to dog and guinea pig-derived allergens has been established. AIM: The aim of the study was to assess the association between the specific serum immunoglobulin E levels (against dog and guinea pig) and the grade of skin symptoms mea…	N		X				N	X	X				N
589	Ovid MEDLINE(R)	Malassezia Yeasts in Veterinary Dermatology: An Updated Overview. [Review]	Frontiers in Cellular & Infection Microbiology. 10:79, 2020.	Journal Article Review	2020	English	Click here for full text options	Lipophilic yeasts of the genus Malassezia are important skin commensals and opportunistic skin pathogens in a variety of animals. The species M. pachydermatis was first isolated from the skin of a captive Indian rhinoceros with an exfoliative dermatitis in 1925, recognized as an important otic pathogen of dogs in the 1950's, and finally accepted, after several years of controversy, as a common ca…	N			X			N	X		X			N
590	Ovid MEDLINE(R)	Atopy patch testing with aeroallergens in a large clinical population of dermatitis patients in Germany and Switzerland, 2000-2015: a retrospective multicentre study.	Journal of the European Academy of Dermatology & Venereology. 34(9):2086-2095, 2020 Sep.	Journal Article Multicenter Study	2020	English	Click here for full text options	BACKGROUND: The diagnostic significance of the atopy patch test for the management of dermatitis possibly triggered by aeroallergens is still controversial. However, sufficiently large studies with routinely tested standardized aeroallergen patch test preparations in dermatitis patients are lacking. OBJECTIVE: To evaluate the reaction frequency and the reaction profiles of 10 until mid-2015 comme…	Y						Y						Y	N	X	X				N		X				N
591	Ovid MEDLINE(R)	Racial disparities in allergic outcomes persist to age 10 years in black and white children.	Annals of Allergy, Asthma, & Immunology. 124(4):342-349, 2020 04.	Journal Article Research Support, N.I.H., Extramural	2020	English	Click here for full text options	BACKGROUND: Previous analyses in the WHEALS birth cohort demonstrated that black children are more likely to experience allergic outcomes than white children by age 2 years. The results could not be explained by a host of variables. OBJECTIVE: Assess whether racial disparities persisted to age 10 years and determine whether any differences could be explained by a panel of variables related to ear…	N		X				N	X	X				N
[truncated: 429 more rows]
